# Supplementary material for: Microcystis pangenome reveals cryptic diversity within and across morphospecies
Source: PubMed Central journal article supplement (PMC9839332; doi:10.1126/sciadv.add3783), 2023-01-13
Supplement: sciadv.add3783_sm.pdf [file sciadv.add3783_sm.pdf]

Supplementary Materials for  
***Microcystis* pangenome reveals cryptic diversity within and  
across morphospecies**

Haiyuan Cai *et al.*

Corresponding author: K. David Hambright, [dhambright@ou.edu](mailto:dhambright@ou.edu)

*Sci. Adv.* **9**, eadd3783 (2023)  
DOI: 10.1126/sciadv.add3783

**This PDF file includes:**

Figs. S1 to S7  
Tables S1 to S7

**A**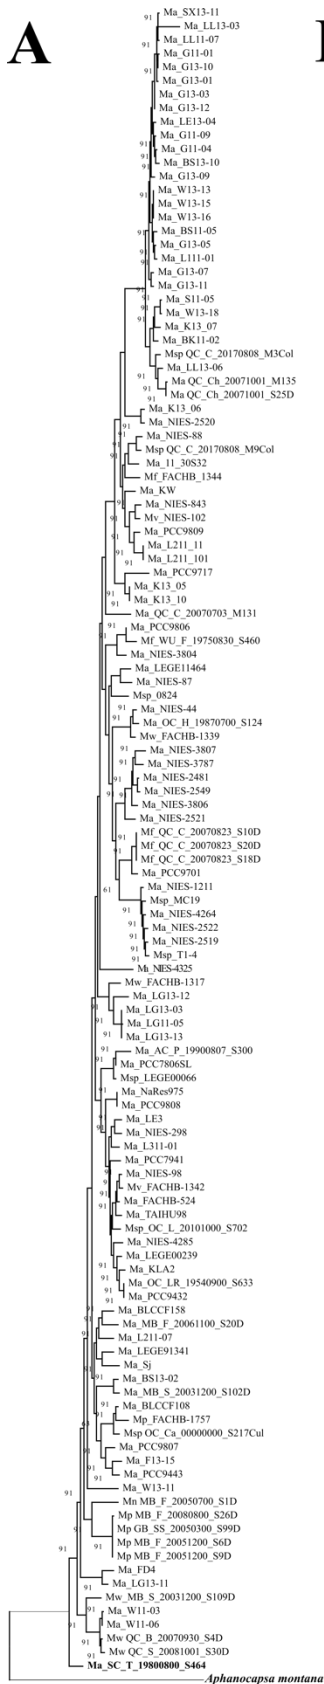*Aphanocapsa montana*

0.20

**B**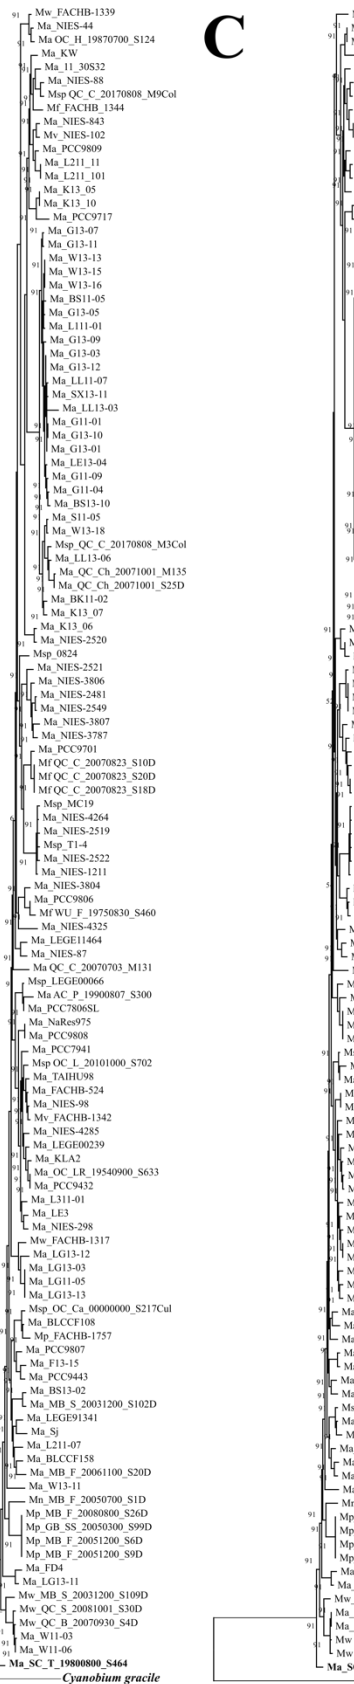*Cyanobium gracile*

0.20

**C**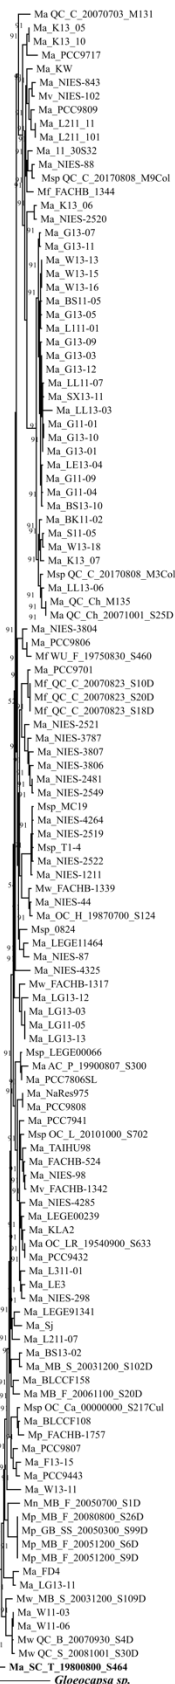*Gloeocapsa sp.*

0.10

**D**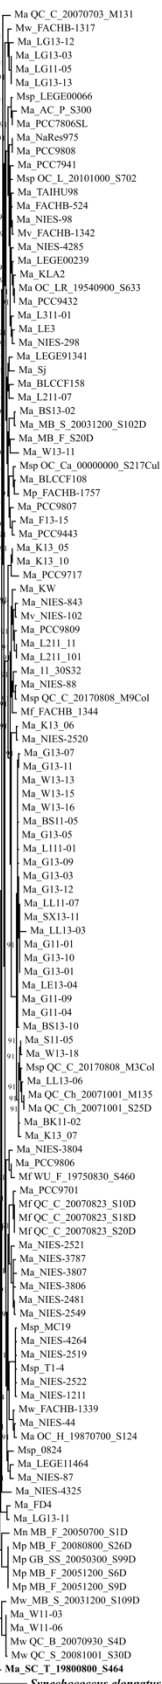*Synechococcus elongatus*

0.10

**Fig. S1.**

**Phylogenomic trees of *Microcystis* and close relatives using the up-to-date bacterial core gene (UBCG) set.** Phylogenetic analyses were performed with 122 *Microcystis* genomes and closely related species to *M. aeruginosa* NIES-843 (based on ANI values) [Harke, 2016 #109], including *Aphanocapsa montana* BDHKU210001 (accession number: NZ\_JTJD00000000.1) (A), *Cyanobium gracile* PCC-6307 (NC\_019675.1) (B), *Gloeocapsa* sp. PCC-7428 (GCA\_000317555.1) (C), and *Synechococcus elongatus* PCC-6301 (AP008231.1) (D). All phylogenetic trees showed *M. aeruginosa* Ma\_SC\_T\_19800800\_S464 (SFBL01) was the root within *Microcystis* clades.

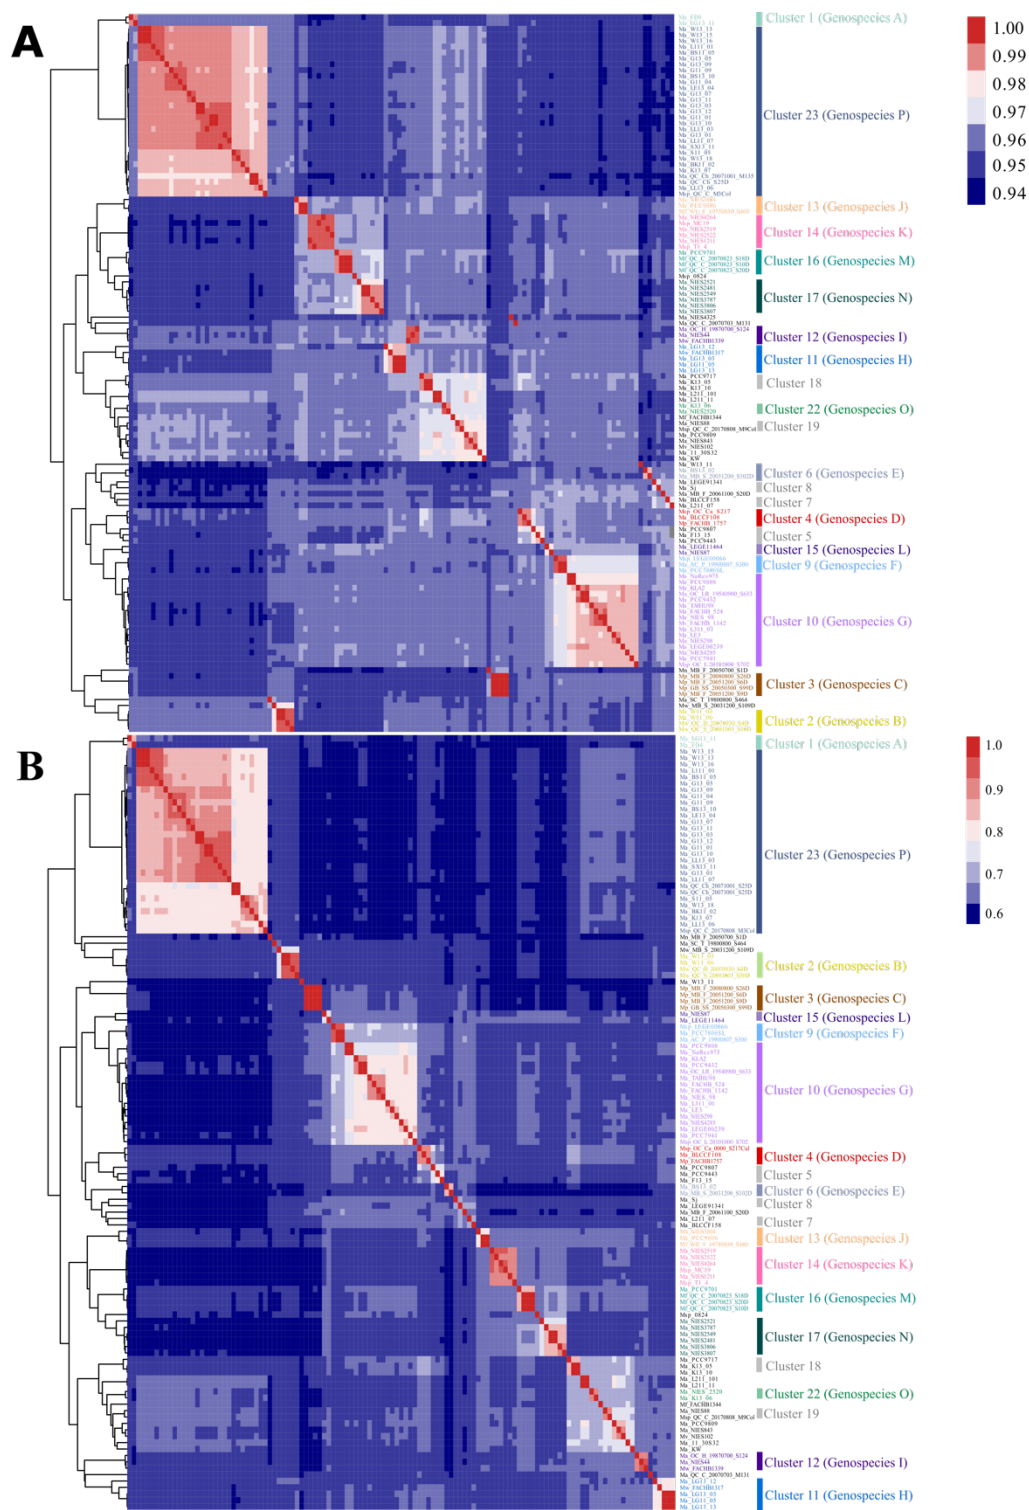

**Fig. S2.**

**Heat map of pairwise ANI (A) and dDDH (B) values for 122 genomes of *Microcystis* strains.** Dendrogram shows the hierarchical clustering. Genome ID is listed in Table S1. Heatmap was visualized with pheatmap v1.0.12 with default parameters. Genomes within clusters 20 or 21 do not form ANI or dDDH clusters.

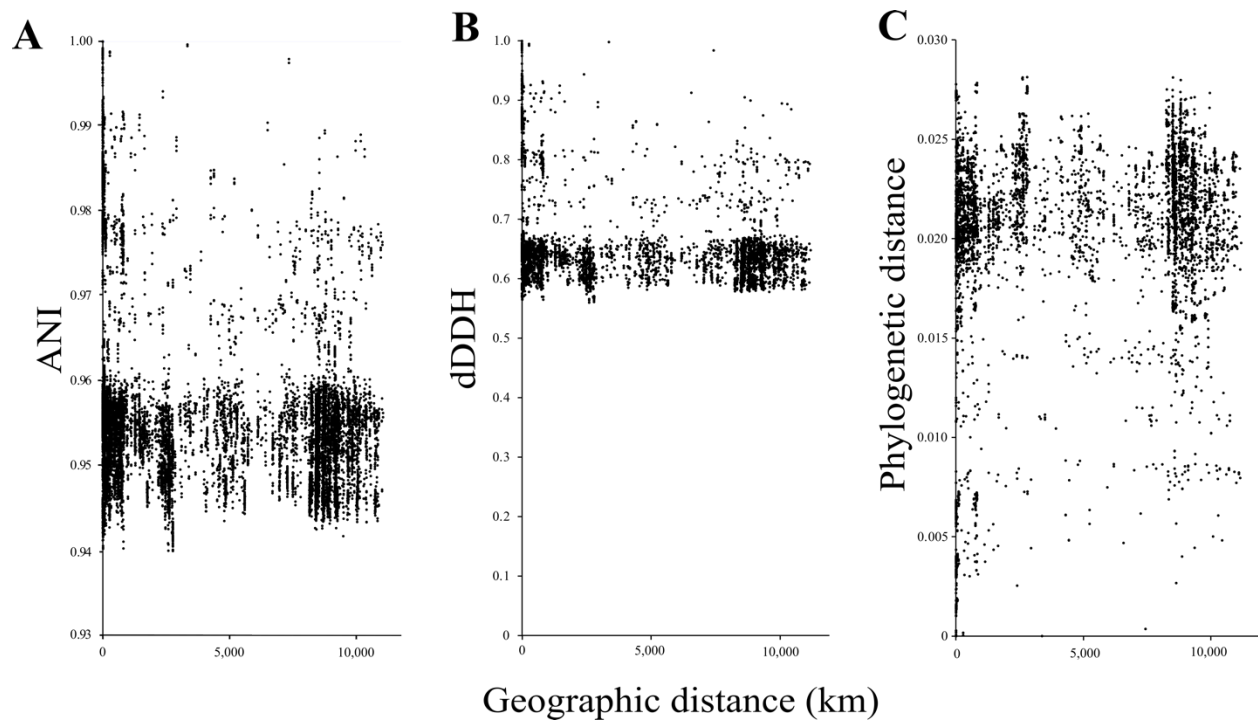

**Fig. S3.**

**Scatter plots of pairwise genome sequence differences and geographic distances between *Microcystis* strains.** Geographic distance between sites was calculated using the “`rdist.earth`” function in the R “`fields`” library. Generalized linear models (GLM) were used to assess the relationships between pairwise genome sequence differences and geographic distances, with 6.9% of the variance in ANI (A), 5.5% of the variance in dDDH (B), and 6.5% of the variance in phylogenetic distance of core genes (C) explained by geographic distance.

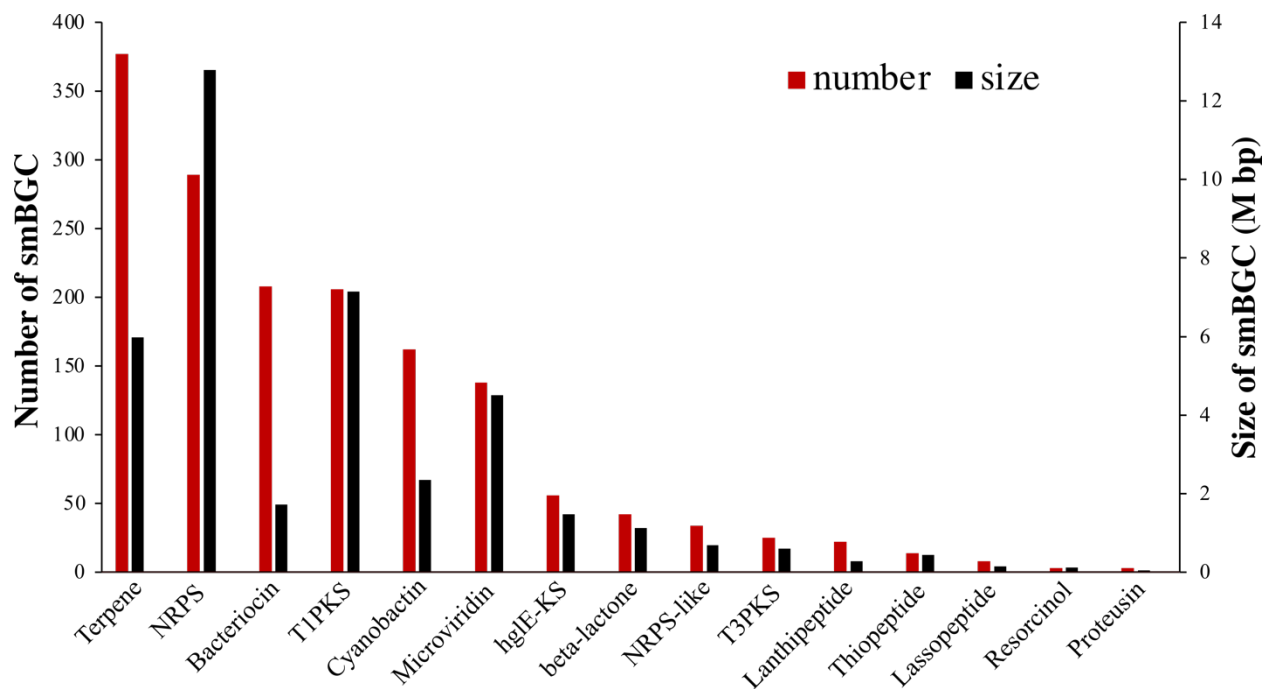

**Fig. S4.**

**Number and size of secondary metabolite biosynthetic gene clusters.** The total number and size of secondary metabolite biosynthetic gene clusters (smBGCs) across 122 *Microcystis* genomes.

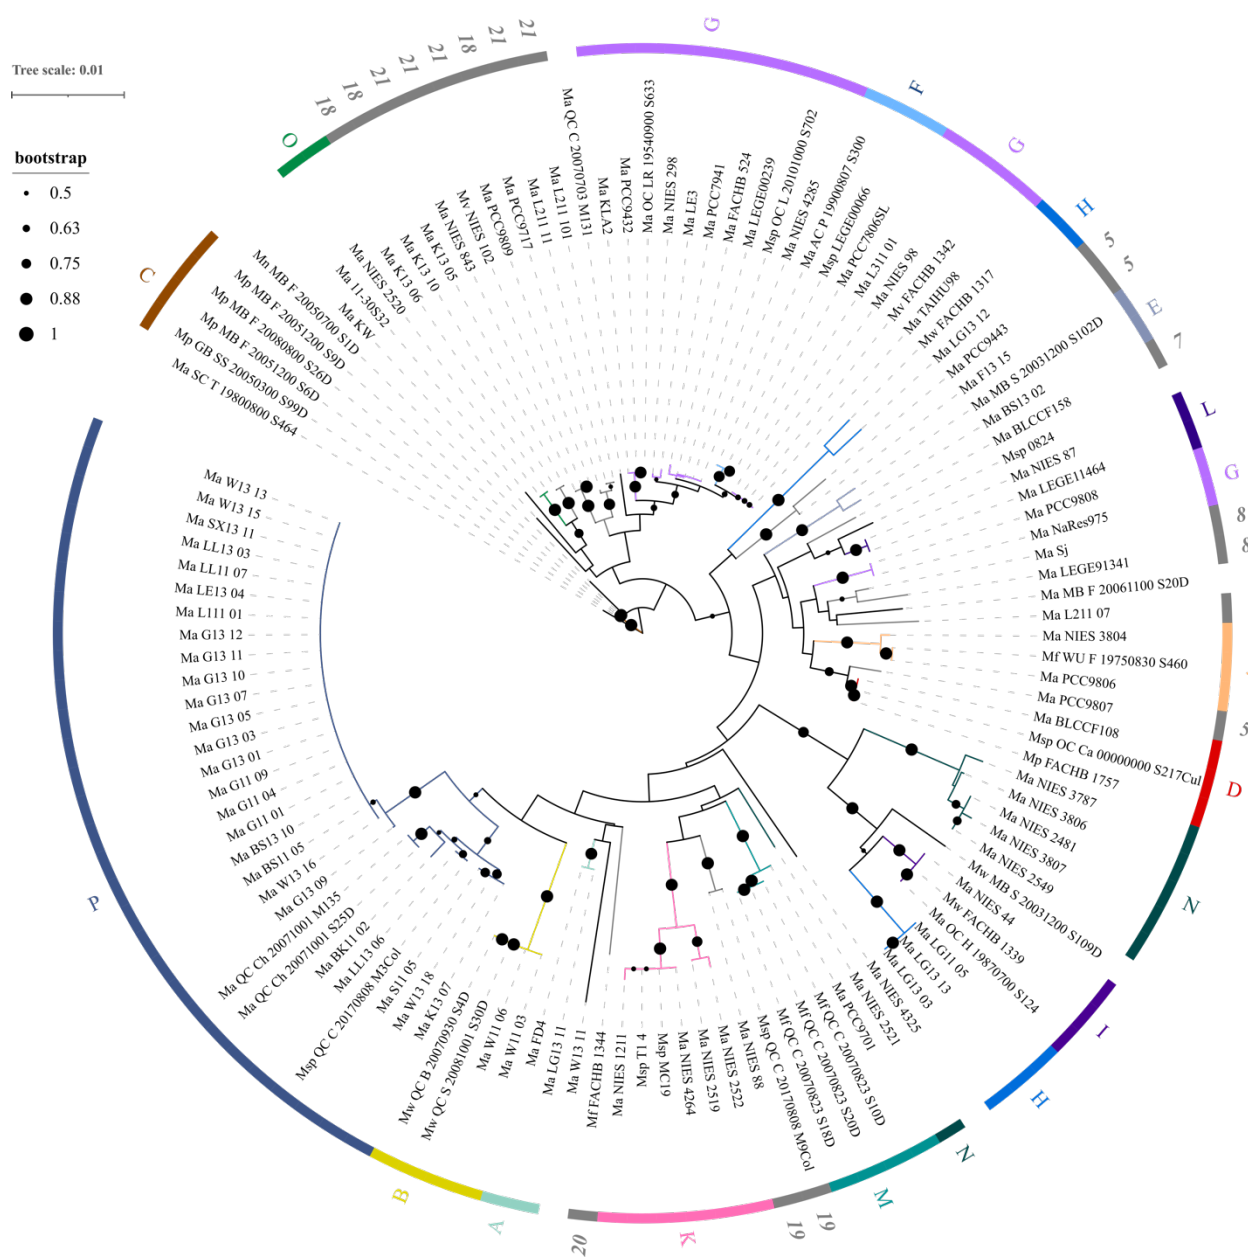

**Fig S5.**

**Maximum Likelihood phylogenetic tree of intergenic spacer of phycocyanin biosynthesis genes (*cpcBA*-IGS) of 122 *Microcystis* genomes.** Bootstrap support values were calculated from 1000 replicates; values above 500 are indicated. *Ma\_SC\_T\_19800800\_S464* was used as the outgroup. The color segments indicate genospecies supported by ANI and dDDH clustering, and grey segments indicate clusters that were not supported by ANI and dDDH clustering.



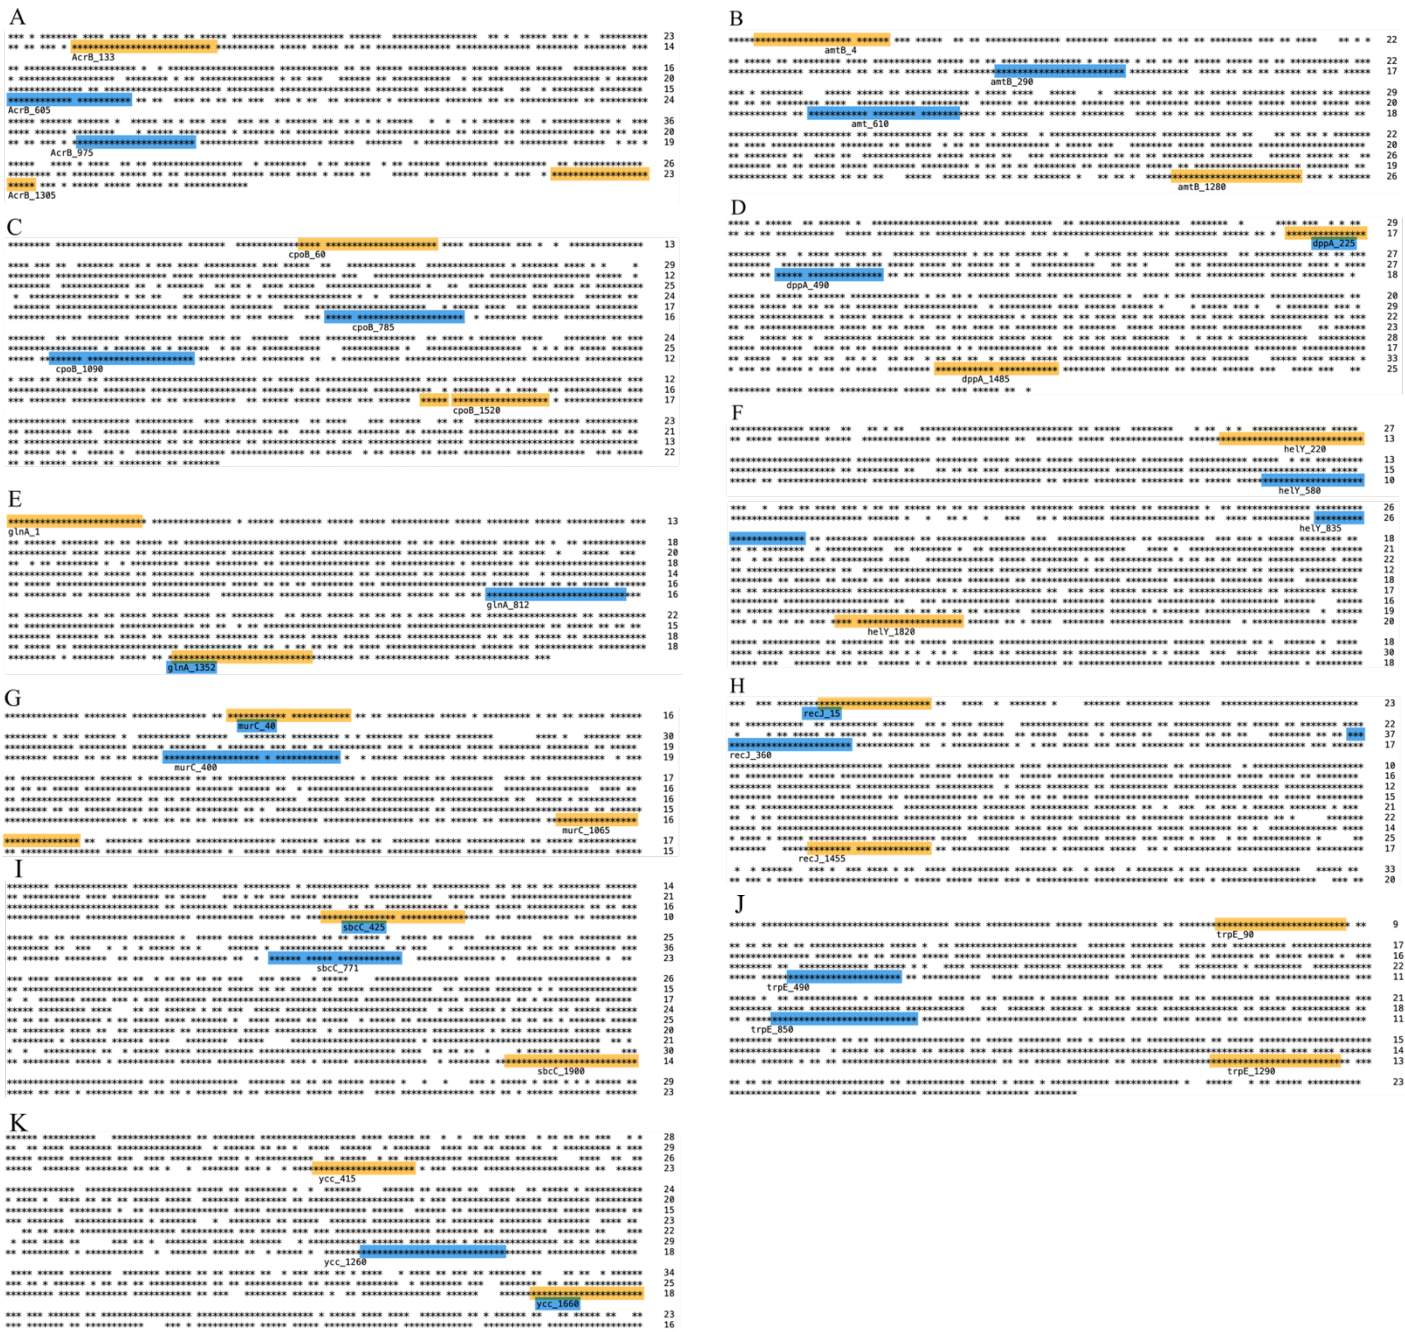

**Fig S6.**

**The distribution of variable and conserved sites of marker genes.** Alignments were constructed using *acrB* (A), *amtB* (B), *cpoB* (C), *dppA* (D), *glnA* (E), *helY* (F), *murC* (G), *recJ* (H), *sbcC* (I), *trpE* (J), *yccS* (K) from our 122 genomes. Asterisks (\*) indicate conserved sites, gaps ( ) indicate variable sites, and the number to the right of each line indicates the number of variable sites (120 total sites each line). The locations of primers for Sanger sequencing and Illumina sequencing are highlighted in yellow and blue, respectively.







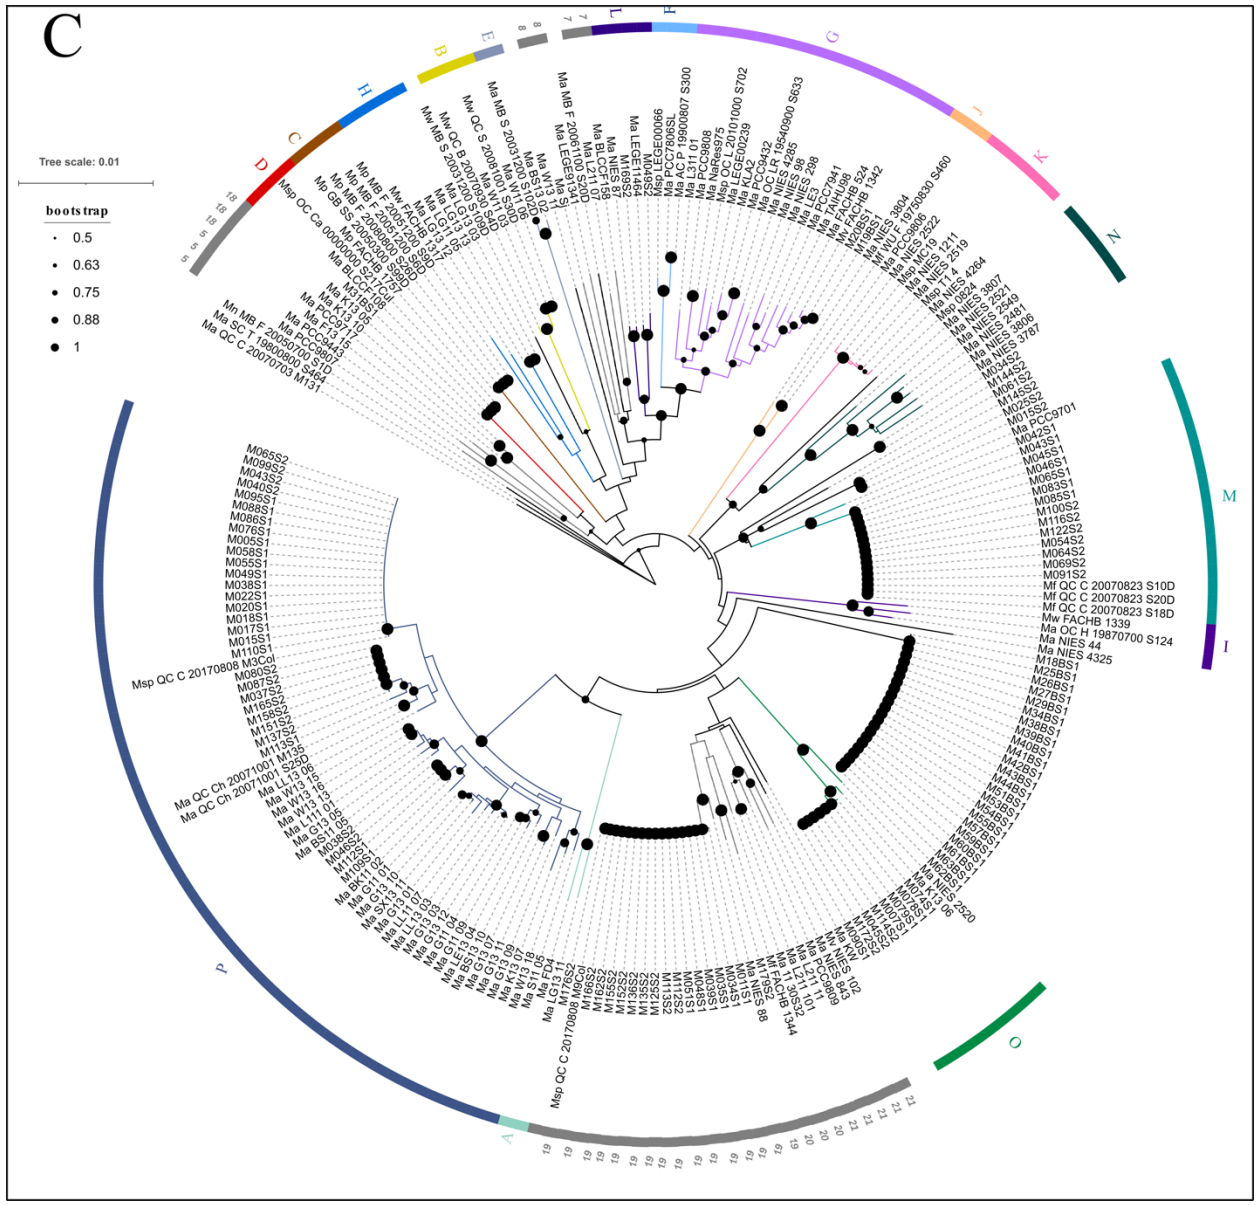

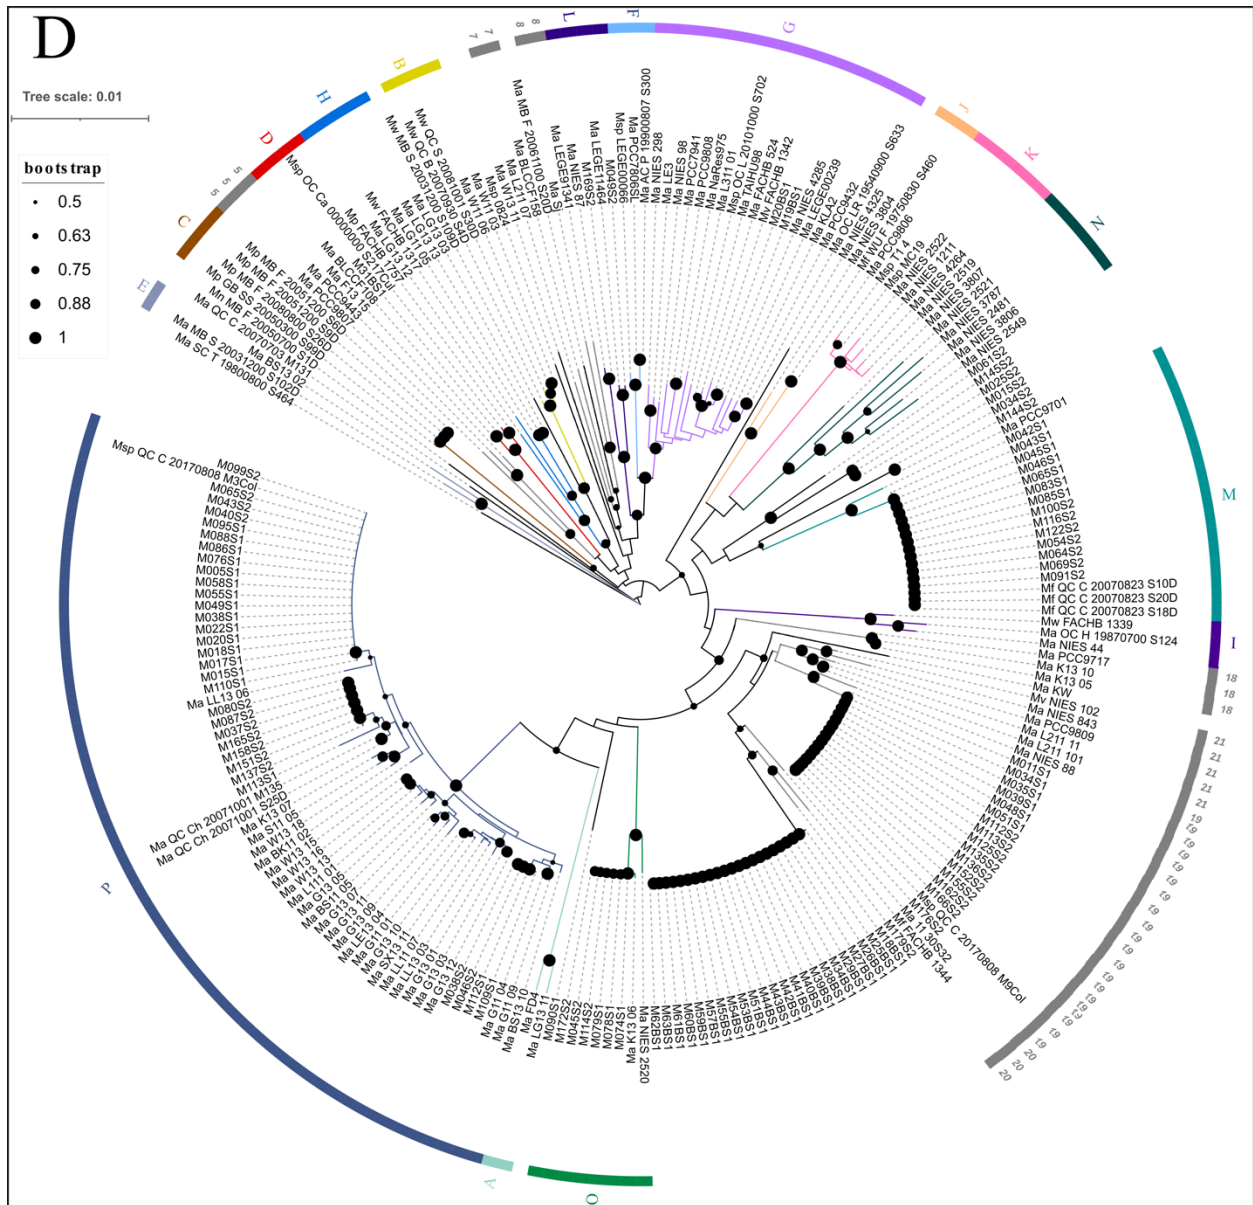

**Fig. S7.**  
**Phylogenetic positions of 106 *Microcystis* MAGs from Lake Champlain and Pampulha Reservoir by the concatenation of four pairs of marker genes.** Phylogenies were constructed using the concatenation of (A) *acrB+glnA*, (B) *amtB+sbC*, (C) *glnA+helyY*, and (D) *helyY+sbC* from our 122 references and extracted from 106 *Microcystis* MAGs from Lake Champlain and Pampulha Reservoir (14). The color segments indicate genospecies supported by ANI and dDDH clustering, and grey segments indicate clusters that were not supported by ANI and dDDH clustering. Ma\_SC\_T\_19800800\_S464 was used as the outgroup.

**Table S1.**

**List of the genome sequences used in this study.** Abbreviation: Ma=*Microcystis aeruginosa*, Mf= *M. flos-aquae*, Mw=*M. wesenbergii*, Mp=*M. panniformis*, Mv=*M. viridis*, Mn=*M. novacekii*. The nine complete genomes are highlighted in **bold print**.

| Strain                 | Status          | Genome size (Mb) | GC%         | Number of contigs | Number of protein-coding sequences <sup>§</sup> | Accession no.        |
|------------------------|-----------------|------------------|-------------|-------------------|-------------------------------------------------|----------------------|
| Ma_11_30S32            | Draft           | 5.357            | 42.7        | 814               | 4930                                            | BHVU01               |
| Ma_AC_P_19900807_S300  | Draft           | 4.512            | 42.5        | 235               | 4174                                            | SFBP01               |
| Ma_BK11_02             | Draft           | 4.924            | 42.6        | 687               | 4619                                            | JAADAC01             |
| Ma_BLCCF108            | Draft           | 5.038            | 42.6        | 487               | 4711                                            | JACEGB01             |
| Ma_BLCCF158            | Draft           | 5.168            | 42.8        | 512               | 4802                                            | JACEGC01             |
| Ma_BS11_05             | Draft           | 4.925            | 42.5        | 586               | 4632                                            | JAADAD01             |
| Ma_BS13_02             | Draft           | 4.624            | 42.3        | 250               | 4333                                            | JAADAE01             |
| Ma_BS13_10             | Draft           | 5.180            | 42.4        | 549               | 4902                                            | JAADAF01             |
| Ma_F13_15              | Draft           | 5.435            | 42.7        | 446               | 5064                                            | JAADAG01             |
| Ma_FACHB_524           | Draft           | 4.846            | 42.6        | 119               | 4625                                            | RJVW01               |
| <b>Ma_FD4</b>          | <b>Complete</b> | <b>5.493</b>     | <b>42.6</b> | <b>2</b>          | <b>5421</b>                                     | <b>NZ_CP046973.1</b> |
| Ma_G11_01              | Draft           | 5.240            | 42.5        | 735               | 4923                                            | JAADAH01             |
| Ma_G11_04              | Draft           | 5.001            | 42.5        | 634               | 4693                                            | JAADAI01             |
| Ma_G11_09              | Draft           | 5.068            | 42.4        | 668               | 4831                                            | JAADAK01             |
| Ma_G13_01              | Draft           | 5.072            | 42.5        | 765               | 4722                                            | JAADAL01             |
| Ma_G13_03              | Draft           | 5.125            | 42.5        | 802               | 4884                                            | JAADAM01             |
| Ma_G13_05              | Draft           | 5.110            | 42.5        | 644               | 4861                                            | JAADAN01             |
| Ma_G13_07              | Draft           | 5.086            | 42.5        | 684               | 4848                                            | JAADAO01             |
| Ma_G13_09              | Draft           | 4.912            | 42.4        | 638               | 4638                                            | JAADAP01             |
| Ma_G13_10              | Draft           | 5.116            | 42.5        | 689               | 4829                                            | JAADAQ01             |
| Ma_G13_11              | Draft           | 5.018            | 42.5        | 674               | 4712                                            | JAADAR01             |
| Ma_G13_12              | Draft           | 5.075            | 42.6        | 774               | 4702                                            | JAADAS01             |
| Ma_K13_05              | Draft           | 5.274            | 42.8        | 456               | 4866                                            | JAADAT01             |
| Ma_K13_06              | Draft           | 4.988            | 42.9        | 353               | 4679                                            | JAADAU01             |
| Ma_K13_07              | Draft           | 4.982            | 42.5        | 615               | 4618                                            | JAADAV01             |
| Ma_K13_10              | Draft           | 5.313            | 42.9        | 481               | 4940                                            | JAADAW01             |
| Ma_KLA2                | Draft           | 5.213            | 42.8        | 251               | 4880                                            | VTRR01               |
| Ma_KW                  | Draft           | 5.889            | 42.8        | 6                 | 5559                                            | MVGR01               |
| Ma_L111_01             | Draft           | 5.012            | 42.6        | 596               | 4723                                            | JAADAX01             |
| Ma_L211_07             | Draft           | 4.934            | 42.7        | 268               | 4557                                            | JAADAY01             |
| Ma_L211_101            | Draft           | 5.105            | 42.7        | 394               | 4829                                            | JAADAZ01             |
| Ma_L211_11             | Draft           | 5.115            | 42.7        | 392               | 4845                                            | JAADBA01             |
| Ma_L311_01             | Draft           | 4.769            | 42.7        | 275               | 4520                                            | JAADBB01             |
| Ma_LE13_04             | Draft           | 5.038            | 42.5        | 631               | 4751                                            | JAADBC01             |
| Ma_LE3                 | Draft           | 4.557            | 42.8        | 163               | 4263                                            | MTBS01               |
| Ma_LEGE00239           | Draft           | 5.072            | 42.5        | 359               | 4836                                            | JADEVY01             |
| Ma_LEGE11464           | Draft           | 4.768            | 42.9        | 500               | 4381                                            | JADEXM01             |
| Ma_LEGE91341           | Draft           | 4.485            | 42.9        | 280               | 4059                                            | JADEXY01             |
| Ma_LG11_05             | Draft           | 5.060            | 42.7        | 326               | 4834                                            | JAADBD01             |
| Ma_LG13_03             | Draft           | 5.041            | 42.7        | 337               | 4803                                            | JAADBE01             |
| Ma_LG13_11             | Draft           | 5.080            | 42.7        | 426               | 4882                                            | JAADBF01             |
| Ma_LG13_12             | Draft           | 4.984            | 42.6        | 396               | 4835                                            | JAADBG01             |
| Ma_LG13_13             | Draft           | 5.049            | 42.7        | 363               | 4827                                            | JAADBH01             |
| Ma_LL11_07             | Draft           | 5.151            | 42.4        | 779               | 4844                                            | JAADBI01             |
| Ma_LL13_03             | Draft           | 5.133            | 42.5        | 801               | 4874                                            | JAADBJ01             |
| Ma_LL13_06             | Draft           | 4.822            | 42.4        | 594               | 4561                                            | JAADBK01             |
| Ma_MB_F_20061100_S20D  | Draft           | 4.505            | 42.7        | 169               | 4201                                            | SFBH01               |
| Ma_MB_S_20031200_S102D | Draft           | 4.636            | 42.5        | 246               | 4291                                            | SFBJ01               |
| Ma_NaRes975            | Draft           | 5.118            | 42.4        | 413               | 4897                                            | MOLN01               |
| Ma_NIES_1211           | Draft           | 4.738            | 42.8        | 264               | 4465                                            | BEIV01               |
| <b>Ma_NIES_2481</b>    | <b>Complete</b> | <b>4.441</b>     | <b>42.8</b> | <b>2</b>          | <b>4155</b>                                     | <b>NZ_CP012375.1</b> |
| Ma_NIES_2519           | Draft           | 4.937            | 42.7        | 412               | 4703                                            | BHVO01               |
| Ma_NIES_2520           | Draft           | 5.272            | 42.8        | 475               | 4837                                            | BHVP01               |
| Ma_NIES_2521           | Draft           | 4.275            | 43.1        | 176               | 4027                                            | BHVQ01               |
| Ma_NIES_2522           | Draft           | 4.895            | 42.7        | 412               | 4627                                            | BHVR01               |
| <b>Ma_NIES_2549</b>    | <b>Complete</b> | <b>4.301</b>     | <b>42.9</b> | <b>2</b>          | <b>3985</b>                                     | <b>NZ_CP011304.1</b> |
| <b>Ma_NIES_298</b>     | <b>Complete</b> | <b>5.015</b>     | <b>42.6</b> | <b>2</b>          | <b>4742</b>                                     | <b>NZ_CP046058.1</b> |



|                            |                 |              |             |          |             |                      |
|----------------------------|-----------------|--------------|-------------|----------|-------------|----------------------|
| Ma_NIES_3787               | Draft           | 4.378        | 43.0        | 214      | 4125        | BJCH01               |
| Ma_NIES_3804               | Draft           | 4.493        | 43.0        | 238      | 4225        | BJCI01               |
| Ma_NIES_3806               | Draft           | 4.523        | 43.0        | 235      | 4179        | BJCJ01               |
| Ma_NIES_3807               | Draft           | 4.370        | 43.0        | 228      | 4065        | BJCK01               |
| Ma_NIES_4264               | Draft           | 4.970        | 42.7        | 468      | 4671        | BHVS01               |
| Ma_NIES_4285               | Draft           | 5.255        | 42.6        | 444      | 4928        | BIFY01               |
| Ma_NIES_4325               | Draft           | 3.884        | 43.2        | 166      | 3614        | BJKP01               |
| Ma_NIES_44                 | Draft           | 4.565        | 43.2        | 79       | 4278        | BBPA01               |
| <b>Ma_NIES_843</b>         | <b>Complete</b> | <b>5.843</b> | <b>42.3</b> | <b>1</b> | <b>5595</b> | <b>NC_010296.1</b>   |
| Ma_NIES_87                 | Draft           | 4.947        | 42.9        | 206      | 4522        | BFAC01               |
| Ma_NIES_88                 | Draft           | 5.263        | 43.0        | 29       | 4991        | JXYX01               |
| Ma_NIES_98                 | Draft           | 4.984        | 42.4        | 497      | 4647        | MDZH01               |
| Ma_OC_H_19870700_S124      | Draft           | 4.358        | 43.3        | 213      | 4084        | SFBR01               |
| Ma_OC_LR_19540900_S633     | Draft           | 4.728        | 42.6        | 231      | 4421        | SFBQ01               |
| <b>Ma_PCC7806SL</b>        | <b>Complete</b> | <b>5.139</b> | <b>42.1</b> | <b>1</b> | <b>4858</b> | <b>NZ_CP020771.1</b> |
| Ma_PCC7941                 | Draft           | 4.802        | 42.6        | 77       | 4432        | CAIK01               |
| Ma_PCC9432                 | Draft           | 4.995        | 42.5        | 132      | 4652        | CAIH01               |
| Ma_PCC9443                 | Draft           | 5.185        | 42.7        | 221      | 4763        | CAIJ01               |
| Ma_PCC9701                 | Draft           | 4.756        | 42.7        | 323      | 4402        | CAIQ01               |
| Ma_PCC9717                 | Draft           | 5.300        | 42.7        | 264      | 4800        | CAII01               |
| Ma_PCC9806                 | Draft           | 4.205        | 43.1        | 93       | 3924        | CAIL01               |
| Ma_PCC9807                 | Draft           | 5.156        | 42.6        | 267      | 4758        | CAIM01               |
| Ma_PCC9808                 | Draft           | 5.051        | 42.4        | 141      | 4738        | CAIN01               |
| Ma_PCC9809                 | Draft           | 5.011        | 42.8        | 303      | 4639        | CAIO01               |
| Ma_QC_C_20070703_M131      | Draft           | 4.882        | 42.9        | 274      | 4619        | SFCA01               |
| Ma_QC_Ch_20071001_M135     | Draft           | 4.744        | 42.7        | 463      | 4495        | SFBC01               |
| Ma_QC_Ch_20071001_S25D     | Draft           | 4.611        | 42.6        | 395      | 4343        | SFBE01               |
| Ma_S11_05                  | Draft           | 4.976        | 42.5        | 622      | 4603        | JAADBM01             |
| Ma_SC_T_19800800_S464      | Draft           | 4.771        | 42.5        | 240      | 4429        | SFBL01               |
| Ma_Sj                      | Draft           | 4.617        | 42.8        | 341      | 4192        | BDSG01               |
| Ma_SX13_11                 | Draft           | 5.089        | 42.5        | 805      | 4759        | JAADBO01             |
| Ma_TAIHU98                 | Draft           | 4.850        | 42.5        | 4        | 4694        | ANKQ01               |
| Ma_W11_03                  | Draft           | 4.479        | 42.8        | 257      | 4242        | JAADBP01             |
| Ma_W11_06                  | Draft           | 4.480        | 42.8        | 245      | 4260        | JAADBQ01             |
| Ma_W13_11                  | Draft           | 4.866        | 42.4        | 279      | 4892        | JAADBR01             |
| Ma_W13_13                  | Draft           | 4.964        | 42.5        | 595      | 4681        | JAADBS01             |
| Ma_W13_15                  | Draft           | 5.065        | 42.4        | 638      | 4786        | JAADBT01             |
| Ma_W13_16                  | Draft           | 5.005        | 42.4        | 617      | 4699        | JAADBU01             |
| Ma_W13_18                  | Draft           | 4.975        | 42.5        | 589      | 4613        | JAADBV01             |
| Mf_FACHB_1344              | Draft           | 5.257        | 42.6        | 243      | 4949        | JACJSW01             |
| Mf_QC_C_20070823_S10D      | Draft           | 4.633        | 42.8        | 226      | 4267        | SFAM01               |
| Mf_QC_C_20070823_S18D      | Draft           | 4.694        | 42.8        | 231      | 4367        | SFBT01               |
| Mf_QC_C_20070823_S20D      | Draft           | 4.650        | 42.8        | 216      | 4288        | SFAJ01               |
| Mf_WU_F_19750830_S460      | Draft           | 4.160        | 43.2        | 193      | 3873        | SFAN01               |
| Mn_MB_F_20050700_S1D       | Draft           | 4.789        | 42.8        | 348      | 4581        | SFAV01               |
| <b>Mp_FACHB_1757</b>       | <b>Complete</b> | <b>5.687</b> | <b>42.4</b> | <b>1</b> | <b>5678</b> | <b>NZ_CP011339.1</b> |
| Mp_GB_SS_20050300_S99D     | Draft           | 4.755        | 42.3        | 319      | 4505        | SFAF01               |
| Mp_MB_F_20080800_S26D      | Draft           | 4.762        | 42.3        | 326      | 4553        | SFAH01               |
| Mp_MB_F_20051200_S6D       | Draft           | 4.779        | 42.3        | 336      | 4516        | SFAB01               |
| Mp_MB_F_20051200_S9D       | Draft           | 4.788        | 42.3        | 326      | 4507        | SFAD01               |
| Msp_0824                   | Draft           | 4.103        | 43.0        | 78       | 3838        | BDSM01               |
| Msp_LEGE00066              | Draft           | 4.810        | 42.3        | 383      | 4512        | JAEVX01              |
| <b>Msp_MC19</b>            | <b>Complete</b> | <b>5.020</b> | <b>42.7</b> | <b>1</b> | <b>4816</b> | <b>NZ_CP020664.1</b> |
| Msp_OC_Ca_00000000_S217Cul | Draft           | 4.819        | 42.7        | 372      | 4464        | SFBW01               |
| Msp_OC_L_20101000_S702     | Draft           | 4.800        | 42.7        | 232      | 4405        | SFBO01               |
| Msp_QC_C_20170808_M3Col    | Draft           | 4.536        | 42.5        | 486      | 4202        | SFBY01               |
| Msp_QC_C_20170808_M9Col    | Draft           | 4.486        | 43.0        | 343      | 4142        | SFBZ01               |
| Msp_T1_4                   | Draft           | 4.694        | 42.8        | 449      | 4359        | CAIP01               |
| Mv_FACHB_1342              | Draft           | 4.697        | 51.4        | 138      | 4454        | JACJSV01             |
| <b>Mv_NIES_102</b>         | <b>Complete</b> | <b>5.874</b> | <b>42.4</b> | <b>1</b> | <b>5747</b> | <b>NZ_AP019314.1</b> |
| Mw_FACHB_1317              | Draft           | 5.042        | 42.5        | 248      | 4841        | JACJQV01             |
| Mw_FACHB_1339              | Draft           | 4.431        | 43.2        | 605      | 4104        | JACJPS01             |
| Mw_MB_S_20031200_S109D     | Draft           | 4.447        | 43.0        | 285      | 4246        | SFAP01               |
| Mw_QC_B_20070930_S4D       | Draft           | 4.592        | 42.9        | 207      | 4309        | SFAR01               |
| Mw_QC_S_20081001_S30D      | Draft           | 4.460        | 42.9        | 208      | 4199        | SFAT01               |

§ The number of protein-coding sequences is predicted by prokka v1.14 (69).

**Table S2.**

**List of single copy core genes of *Microcystis* (begin next page).** Description of core genes identified through pangenome analysis. Each core gene was used in the core gene phylogenetic tree was a complete coding sequence and a single-copy gene. Gene names and protein products were identified via blast against NCBI non-redundant database to identify the gene.



| Representative gene<br>(Mv_NIES-102 as<br>reference) | Used for core<br>genome tree? | %<br>presence | % intact &<br>single-<br>copy | No.<br>BP | Name   | Product                                                                         |
|------------------------------------------------------|-------------------------------|---------------|-------------------------------|-----------|--------|---------------------------------------------------------------------------------|
| Mv_NIES-102_04444                                    | Y                             | 100%          | 100%                          | 989       | accA   | Acetyl-coenzyme A carboxylase carboxyl transferase subunit alpha                |
| Mv_NIES-102_03959                                    | Y                             | 100%          | 100%                          | 1205      | ackA   | Acetate kinase                                                                  |
| Mv_NIES-102_01950                                    | Y                             | 100%          | 100%                          | 1034      | acoA   | Acetoin:2%2C6-dichlorophenolindophenol oxidoreductase subunit alpha             |
| Mv_NIES-102_05075                                    | Y                             | 100%          | 100%                          | 248       | acpP_2 | Acyl carrier protein                                                            |
| Mv_NIES-102_03296                                    | Y                             | 100%          | 100%                          | 1970      | acsA   | Acetyl-coenzyme A synthetase                                                    |
| Mv_NIES-102_02735                                    | Y                             | 100%          | 100%                          | 554       | act    | Methanol dehydrogenase activator                                                |
| Mv_NIES-102_02366                                    | Y                             | 100%          | 100%                          | 2693      | adhE   | Aldehyde-alcohol dehydrogenase                                                  |
| Mv_NIES-102_03088                                    | Y                             | 100%          | 100%                          | 566       | adk    | Adenylate kinase                                                                |
| Mv_NIES-102_02457                                    | Y                             | 100%          | 100%                          | 1277      | ahcY   | Adenosylhomocysteinase                                                          |
| Mv_NIES-102_03877                                    | Y                             | 100%          | 100%                          | 1376      | aldH1  | 4%2C4'-diaponeurosporen-aldehyde dehydrogenase                                  |
| Mv_NIES-102_05469                                    | Y                             | 100%          | 100%                          | 1061      | algA_3 | Alginate biosynthesis protein AlgA                                              |
| Mv_NIES-102_04253                                    | Y                             | 100%          | 100%                          | 1652      | alsS   | Acetolactate synthase                                                           |
| Mv_NIES-102_02065                                    | Y                             | 100%          | 100%                          | 1397      | amiB2  | Putative amidase AmiB2                                                          |
| Mv_NIES-102_04276                                    | Y                             | 100%          | 100%                          | 1316      | amiC   | Aliphatic amidase expression-regulating protein                                 |
| Mv_NIES-102_03978                                    | Y                             | 100%          | 100%                          | 1241      | ampG   | Anhydromuropeptide permease                                                     |
| Mv_NIES-102_01546                                    | Y                             | 100%          | 100%                          | 1436      | amtB_1 | Ammonia channel                                                                 |
| Mv_NIES-102_01959                                    | Y                             | 100%          | 100%                          | 1373      | ankX   | Phosphocholine transferase AnkX                                                 |
| Mv_NIES-102_03188                                    | Y                             | 100%          | 100%                          | 662       | apaH_1 | Bis(5'-nucleosyl)-tetraphosphatase%2C symmetrical                               |
| Mv_NIES-102_04740                                    | Y                             | 100%          | 100%                          | 764       | apaH_2 | Bis(5'-nucleosyl)-tetraphosphatase%2C symmetrical                               |
| Mv_NIES-102_00119                                    | Y                             | 100%          | 100%                          | 1061      | apbC   | Iron-sulfur cluster carrier protein                                             |
| Mv_NIES-102_04644                                    | Y                             | 100%          | 100%                          | 485       | apcA   | Allophycocyanin alpha chain                                                     |
| Mv_NIES-102_04643                                    | Y                             | 100%          | 100%                          | 485       | apcB   | Allophycocyanin beta chain                                                      |
| Mv_NIES-102_04642                                    | Y                             | 100%          | 100%                          | 203       | apcC   | Phycobilisome 7.8 kDa linker polypeptide%2C allophycocyanin-associated%2C core  |
| Mv_NIES-102_05684                                    | Y                             | 100%          | 100%                          | 593       | apcD_2 | Phycobiliprotein beta chain                                                     |
| Mv_NIES-102_02370                                    | Y                             | 100%          | 100%                          | 2705      | apcE   | Phycobiliprotein ApcE                                                           |
| Mv_NIES-102_01346                                    | Y                             | 100%          | 100%                          | 1571      | apnhaP | Na(+)/H(+) antiporter ApNhaP                                                    |
| Mv_NIES-102_00203                                    | Y                             | 100%          | 100%                          | 1733      | appA   | Oligopeptide-binding protein AppA                                               |
| Mv_NIES-102_01607                                    | Y                             | 100%          | 100%                          | 518       | apt    | Adenine phosphoribosyltransferase                                               |
| Mv_NIES-102_05140                                    | Y                             | 100%          | 100%                          | 1283      | argD   | Acetylornithine aminotransferase                                                |
| Mv_NIES-102_02795                                    | Y                             | 100%          | 100%                          | 926       | argF   | Ornithine carbamoyltransferase                                                  |
| Mv_NIES-102_03890                                    | Y                             | 100%          | 100%                          | 1205      | argG   | Argininosuccinate synthase                                                      |
| Mv_NIES-102_00761                                    | Y                             | 100%          | 100%                          | 1757      | argS   | Arginine--tRNA ligase                                                           |
| Mv_NIES-102_01439                                    | Y                             | 100%          | 100%                          | 1625      | armT   | Undecaprenyl phosphate-alpha-4-amino-4-deoxy-L-arabinose arabinosyl transferase |
| Mv_NIES-102_05115                                    | Y                             | 100%          | 100%                          | 1340      | aroA1  | 3-phosphoshikimate 1-carboxyvinyltransferase 1                                  |
| Mv_NIES-102_00298                                    | Y                             | 100%          | 100%                          | 1100      | aroB   | 3-dehydroquinate synthase                                                       |
| Mv_NIES-102_05457                                    | Y                             | 100%          | 100%                          | 1100      | aroC   | Chorismate synthase                                                             |
| Mv_NIES-102_01323                                    | Y                             | 100%          | 100%                          | 860       | aroE   | Shikimate dehydrogenase (NADP(+))                                               |
| Mv_NIES-102_05475                                    | Y                             | 100%          | 100%                          | 401       | aroH   | Chorismate mutase AroH                                                          |
| Mv_NIES-102_05673                                    | Y                             | 100%          | 100%                          | 572       | aroK   | Shikimate kinase                                                                |
| Mv_NIES-102_01268                                    | Y                             | 100%          | 100%                          | 1187      | arsA_1 | Arsenical pump-driving ATPase                                                   |
| Mv_NIES-102_01317                                    | Y                             | 100%          | 100%                          | 1901      | arsA_2 | Arsenical pump-driving ATPase                                                   |
| Mv_NIES-102_03932                                    | Y                             | 100%          | 100%                          | 398       | arsC   | Glutaredoxin arsenate reductase                                                 |
| Mv_NIES-102_03933                                    | Y                             | 100%          | 100%                          | 647       | arsH_1 | NADPH-dependent quinone reductase ArsH                                          |
| Mv_NIES-102_03968                                    | Y                             | 100%          | 100%                          | 542       | arsH_2 | NADPH-dependent quinone reductase ArsH                                          |
| Mv_NIES-102_03935                                    | Y                             | 100%          | 100%                          | 338       | arsR   | Arsenical resistance operon repressor                                           |
| Mv_NIES-102_00657                                    | Y                             | 100%          | 100%                          | 1166      | aspC_1 | Aspartate aminotransferase                                                      |
| Mv_NIES-102_01106                                    | Y                             | 100%          | 100%                          | 1163      | aspC_2 | Aspartate aminotransferase                                                      |
| Mv_NIES-102_01272                                    | Y                             | 100%          | 100%                          | 1787      | aspS   | Aspartate--tRNA ligase                                                          |
| Mv_NIES-102_02451                                    | Y                             | 100%          | 100%                          | 1508      | atpA   | ATP synthase subunit alpha                                                      |

| Representative gene<br>(Mv_NIES-102 as<br>reference) | Used for core<br>genome tree? | %<br>presence | % intact &<br>single-<br>copy | No.<br>BP | Name    | Product                                                                         |
|------------------------------------------------------|-------------------------------|---------------|-------------------------------|-----------|---------|---------------------------------------------------------------------------------|
| Mv_NIES-102_03754                                    | Y                             | 100%          | 100%                          | 416       | atpC    | ATP synthase epsilon chain                                                      |
| Mv_NIES-102_03753                                    | Y                             | 100%          | 100%                          | 1448      | atpD    | ATP synthase subunit beta                                                       |
| Mv_NIES-102_02449                                    | Y                             | 100%          | 100%                          | 542       | atpF    | ATP synthase subunit b                                                          |
| Mv_NIES-102_02452                                    | Y                             | 100%          | 100%                          | 947       | atpG_2  | ATP synthase gamma chain                                                        |
| Mv_NIES-102_02450                                    | Y                             | 100%          | 100%                          | 548       | atpH    | ATP synthase subunit delta                                                      |
| Mv_NIES-102_03594                                    | Y                             | 100%          | 100%                          | 794       | aviRb   | 23S rRNA (uridine(2479)-2'-O)-methyltransferase                                 |
| Mv_NIES-102_01458                                    | Y                             | 100%          | 100%                          | 2075      | bamA_1  | Outer membrane protein assembly factor BamA                                     |
| Mv_NIES-102_02329                                    | Y                             | 100%          | 100%                          | 1073      | bchI    | Magnesium-chelatase 38 kDa subunit                                              |
| Mv_NIES-102_01642                                    | Y                             | 100%          | 100%                          | 455       | bcp_1   | Putative peroxiredoxin bcp                                                      |
| Mv_NIES-102_01989                                    | Y                             | 100%          | 100%                          | 467       | bcp_2   | Putative peroxiredoxin bcp                                                      |
| Mv_NIES-102_02742                                    | Y                             | 100%          | 100%                          | 704       | bcsA    | Cellulose synthase catalytic subunit [UDP-forming]                              |
| Mv_NIES-102_01174                                    | Y                             | 100%          | 100%                          | 3302      | bepE    | Efflux pump membrane transporter BepE                                           |
| Mv_NIES-102_02178                                    | Y                             | 100%          | 100%                          | 1601      | besA    | L-propargylglycine--L-glutamate ligase                                          |
| Mv_NIES-102_04223                                    | Y                             | 100%          | 100%                          | 983       | bfmBAB  | 2-oxoisovalerate dehydrogenase subunit beta                                     |
| Mv_NIES-102_03685                                    | Y                             | 100%          | 100%                          | 1094      | bioB    | Biotin synthase                                                                 |
| Mv_NIES-102_05412                                    | Y                             | 100%          | 100%                          | 1148      | bshA    | N-acetyl-alpha-D-glucosaminyl L-malate synthase                                 |
| Mv_NIES-102_00429                                    | Y                             | 100%          | 100%                          | 893       | btuD_2  | Vitamin B12 import ATP-binding protein BtuD                                     |
| Mv_NIES-102_01770                                    | Y                             | 100%          | 100%                          | 755       | btuD_3  | Vitamin B12 import ATP-binding protein BtuD                                     |
| Mv_NIES-102_03284                                    | Y                             | 100%          | 100%                          | 2015      | btuD_8  | Vitamin B12 import ATP-binding protein BtuD                                     |
| Mv_NIES-102_05020                                    | Y                             | 100%          | 100%                          | 728       | cah     | Carbonic anhydrase                                                              |
| Mv_NIES-102_02476                                    | Y                             | 100%          | 100%                          | 3245      | carB    | Carbamoyl-phosphate synthase large chain                                        |
| Mv_NIES-102_00463                                    | Y                             | 100%          | 100%                          | 914       | carC_1  | 2-hydroxy-6-oxo-6-(2'-aminophenyl)hexa-2%2C4-dienoic acid hydrolase             |
| Mv_NIES-102_05476                                    | Y                             | 100%          | 100%                          | 893       | carC_2  | 2-hydroxy-6-oxo-6-(2'-aminophenyl)hexa-2%2C4-dienoic acid hydrolase             |
| Mv_NIES-102_02233                                    | Y                             | 100%          | 100%                          | 1415      | cbbL    | Ribulose biphosphate carboxylase large chain                                    |
| Mv_NIES-102_02231                                    | Y                             | 100%          | 100%                          | 335       | cbbS    | Ribulose biphosphate carboxylase small chain                                    |
| Mv_NIES-102_04263                                    | Y                             | 100%          | 100%                          | 1376      | cbiA    | Cobyrinate a%2Cc-diamide synthase                                               |
| Mv_NIES-102_03429                                    | Y                             | 100%          | 100%                          | 782       | cbiO    | Cobalt import ATP-binding protein CbiO                                          |
| Mv_NIES-102_04204                                    | Y                             | 100%          | 100%                          | 710       | cbiX    | Sirohydrochlorin cobaltochelatae                                                |
| Mv_NIES-102_05161                                    | Y                             | 100%          | 100%                          | 875       | cbpA    | Curved DNA-binding protein                                                      |
| Mv_NIES-102_02237                                    | Y                             | 100%          | 100%                          | 341       | ccmK1   | Carbon dioxide-concentrating mechanism protein CcmK                             |
| Mv_NIES-102_02238                                    | Y                             | 100%          | 100%                          | 311       | ccmK2   | Carbon dioxide-concentrating mechanism protein CcmK                             |
| Mv_NIES-102_02236                                    | Y                             | 100%          | 100%                          | 311       | ccmL    | Carbon dioxide concentrating mechanism protein CcmL                             |
| Mv_NIES-102_03870                                    | Y                             | 100%          | 100%                          | 986       | ccsA    | Cytochrome c biogenesis protein CcsA                                            |
| Mv_NIES-102_00226                                    | Y                             | 100%          | 100%                          | 920       | cdaA    | Cyclic di-AMP synthase CdaA                                                     |
| Mv_NIES-102_02442                                    | Y                             | 100%          | 100%                          | 1133      | cdr     | Coenzyme A disulfide reductase                                                  |
| Mv_NIES-102_02270                                    | Y                             | 100%          | 100%                          | 1214      | cefD_1  | Isopenicillin N epimerase                                                       |
| Mv_NIES-102_02777                                    | Y                             | 100%          | 100%                          | 1526      | chlB    | Light-independent protochlorophyllide reductase subunit B                       |
| Mv_NIES-102_05183                                    | Y                             | 100%          | 100%                          | 869       | chlL    | Light-independent protochlorophyllide reductase iron-sulfur ATP-binding protein |
| Mv_NIES-102_02919                                    | Y                             | 100%          | 100%                          | 692       | chlM    | Magnesium-protoporphyrin O-methyltransferase                                    |
| Mv_NIES-102_05185                                    | Y                             | 100%          | 100%                          | 1400      | chlN    | Light-independent protochlorophyllide reductase subunit N                       |
| Mv_NIES-102_03673                                    | Y                             | 100%          | 100%                          | 1640      | cimA    | (R)-citramalate synthase                                                        |
| Mv_NIES-102_05244                                    | Y                             | 100%          | 100%                          | 1253      | cinA    | Putative competence-damage inducible protein                                    |
| Mv_NIES-102_01408                                    | Y                             | 100%          | 100%                          | 2591      | clcA    | H(+)/Cl(-) exchange transporter ClcA                                            |
| Mv_NIES-102_01463                                    | Y                             | 100%          | 100%                          | 2723      | clpB1_1 | Chaperone protein ClpB 1                                                        |
| Mv_NIES-102_00282                                    | Y                             | 100%          | 100%                          | 2387      | clpC_1  | ATP-dependent Clp protease ATP-binding subunit ClpC                             |
| Mv_NIES-102_03634                                    | Y                             | 100%          | 100%                          | 701       | clpP_3  | ATP-dependent Clp protease proteolytic subunit                                  |
| Mv_NIES-102_02639                                    | Y                             | 100%          | 100%                          | 287       | clpS_1  | ATP-dependent Clp protease adapter protein ClpS                                 |
| Mv_NIES-102_04352                                    | Y                             | 100%          | 100%                          | 293       | clpS_2  | ATP-dependent Clp protease adapter protein ClpS                                 |
| Mv_NIES-102_03635                                    | Y                             | 100%          | 100%                          | 1334      | clpX    | ATP-dependent Clp protease ATP-binding subunit ClpX                             |

| Representative gene<br>(Mv_NIES-102 as<br>reference) | Used for core<br>genome tree? | %<br>presence | % intact &<br>single-<br>copy | No.<br>BP | Name    | Product                                                                      |
|------------------------------------------------------|-------------------------------|---------------|-------------------------------|-----------|---------|------------------------------------------------------------------------------|
| Mv_NIES-102_05063                                    | Y                             | 100%          | 100%                          | 827       | cmpB_2  | Bicarbonate transport system permease protein CmpB                           |
| Mv_NIES-102_05062                                    | Y                             | 100%          | 100%                          | 2006      | cmpC_1  | Bicarbonate transport ATP-binding protein CmpC                               |
| Mv_NIES-102_05542                                    | Y                             | 100%          | 100%                          | 2018      | cmpC_2  | Bicarbonate transport ATP-binding protein CmpC                               |
| Mv_NIES-102_05061                                    | Y                             | 100%          | 100%                          | 998       | cmpD_2  | Bicarbonate transport ATP-binding protein CmpD                               |
| Mv_NIES-102_05543                                    | Y                             | 100%          | 100%                          | 839       | cmpD_3  | Bicarbonate transport ATP-binding protein CmpD                               |
| Mv_NIES-102_05090                                    | Y                             | 100%          | 100%                          | 944       | cmpR_2  | HTH-type transcriptional activator CmpR                                      |
| Mv_NIES-102_05482                                    | Y                             | 100%          | 100%                          | 995       | cmpR_3  | HTH-type transcriptional activator CmpR                                      |
| Mv_NIES-102_04326                                    | Y                             | 100%          | 100%                          | 473       | coaD    | Phosphopantetheine adenyllyltransferase                                      |
| Mv_NIES-102_01092                                    | Y                             | 100%          | 100%                          | 980       | cobD_1  | Cobalamin biosynthesis protein CobD                                          |
| Mv_NIES-102_01684                                    | Y                             | 100%          | 100%                          | 1115      | cobD_2  | Threonine-phosphate decarboxylase                                            |
| Mv_NIES-102_01885                                    | Y                             | 100%          | 100%                          | 3641      | cobN_1  | Aerobic cobaltochelatase subunit CobN                                        |
| Mv_NIES-102_04817                                    | Y                             | 100%          | 100%                          | 3986      | cobN_2  | Aerobic cobaltochelatase subunit CobN                                        |
| Mv_NIES-102_03078                                    | Y                             | 100%          | 100%                          | 1475      | cobQ    | Cobyric acid synthase                                                        |
| Mv_NIES-102_01644                                    | Y                             | 100%          | 100%                          | 1643      | cocE    | Cocaine esterase                                                             |
| Mv_NIES-102_05165                                    | Y                             | 100%          | 100%                          | 725       | comB    | putative 2-phosphosulfolactate phosphatase                                   |
| Mv_NIES-102_05298                                    | Y                             | 100%          | 100%                          | 1526      | comM    | Competence protein ComM                                                      |
| Mv_NIES-102_00219                                    | Y                             | 100%          | 100%                          | 1157      | corA_1  | Cobalt/magnesium transport protein CorA                                      |
| Mv_NIES-102_02087                                    | Y                             | 100%          | 100%                          | 1160      | corA_2  | Cobalt/magnesium transport protein CorA                                      |
| Mv_NIES-102_00150                                    | Y                             | 100%          | 100%                          | 488       | cpcA    | C-phycoerythrin alpha chain                                                  |
| Mv_NIES-102_00149                                    | Y                             | 100%          | 100%                          | 518       | cpcB    | C-phycoerythrin beta chain                                                   |
| Mv_NIES-102_00152                                    | Y                             | 100%          | 100%                          | 878       | cpcC1   | Phycobilisome 32.1 kDa linker polypeptide%2C phycocyanin-associated%2C rod 1 |
| Mv_NIES-102_00442                                    | Y                             | 100%          | 100%                          | 812       | cpcE    | Phycocyanobilin lyase subunit alpha                                          |
| Mv_NIES-102_00433                                    | Y                             | 100%          | 100%                          | 647       | cpcF    | Phycocyanobilin lyase subunit beta                                           |
| Mv_NIES-102_02278                                    | Y                             | 100%          | 100%                          | 752       | cpcG    | Phycobilisome rod-core linker polypeptide CpcG                               |
| Mv_NIES-102_03986                                    | Y                             | 100%          | 100%                          | 554       | cpcS_2  | Chromophore lyase CpcS/CpeS                                                  |
| Mv_NIES-102_04378                                    | Y                             | 100%          | 100%                          | 584       | cpcT1   | Phycocyanobilin lyase CpcT                                                   |
| Mv_NIES-102_04652                                    | Y                             | 100%          | 100%                          | 602       | cpcT2_1 | Phycocyanobilin lyase CpcT                                                   |
| Mv_NIES-102_02100                                    | Y                             | 100%          | 100%                          | 1136      | cpdA_2  | 3%2C5'-cyclic adenosine monophosphate phosphodiesterase CpdA                 |
| Mv_NIES-102_01859                                    | Y                             | 100%          | 100%                          | 539       | cpeS2   | Putative phycocyanobilin lyase CpcS 2                                        |
| Mv_NIES-102_00413                                    | Y                             | 100%          | 100%                          | 980       | cphB_1  | Cyanophycinase                                                               |
| Mv_NIES-102_00712                                    | Y                             | 100%          | 100%                          | 2168      | cpoB_1  | Cell division coordinator CpoB                                               |
| Mv_NIES-102_04133                                    | Y                             | 100%          | 100%                          | 389       | crcB_1  | Putative fluoride ion transporter CrcB                                       |
| Mv_NIES-102_04134                                    | Y                             | 100%          | 100%                          | 404       | crcB_2  | Putative fluoride ion transporter CrcB                                       |
| Mv_NIES-102_03035                                    | Y                             | 100%          | 100%                          | 806       | crnA    | Creatinine amidohydrolase                                                    |
| Mv_NIES-102_04900                                    | Y                             | 100%          | 100%                          | 932       | crtB    | 15-cis-phytoene synthase                                                     |
| Mv_NIES-102_04249                                    | Y                             | 100%          | 100%                          | 1505      | crtN    | 4%2C4'-diapophytoene desaturase (4%2C4'-diapolycopene-forming)               |
| Mv_NIES-102_04834                                    | Y                             | 100%          | 100%                          | 1511      | crtNb   | 4%2C4'-diapolycopene oxygenase                                               |
| Mv_NIES-102_00015                                    | Y                             | 100%          | 100%                          | 1262      | csd     | putative cysteine desulfurase                                                |
| Mv_NIES-102_00003                                    | Y                             | 100%          | 100%                          | 920       | ctaA    | Heme A synthase                                                              |
| Mv_NIES-102_00004                                    | Y                             | 100%          | 100%                          | 965       | ctaC    | Cytochrome c oxidase subunit 2                                               |
| Mv_NIES-102_00005                                    | Y                             | 100%          | 100%                          | 1676      | ctaD    | Cytochrome c oxidase subunit 1                                               |
| Mv_NIES-102_00006                                    | Y                             | 100%          | 100%                          | 623       | ctaE    | putative cytochrome c oxidase subunit 3                                      |
| Mv_NIES-102_00812                                    | Y                             | 100%          | 100%                          | 1238      | ctpA    | Carboxy-terminal processing protease CtpA                                    |
| Mv_NIES-102_01571                                    | Y                             | 100%          | 100%                          | 2525      | cugP_1  | UTP--glucose-1-phosphate uridylyltransferase                                 |
| Mv_NIES-102_03688                                    | Y                             | 100%          | 100%                          | 1073      | cugP_3  | UTP--glucose-1-phosphate uridylyltransferase                                 |
| Mv_NIES-102_02371                                    | Y                             | 100%          | 100%                          | 338       | cutA    | Divalent-cation tolerance protein CutA                                       |
| Mv_NIES-102_04656                                    | Y                             | 100%          | 100%                          | 437       | cynS    | Cyanate hydratase                                                            |
| Mv_NIES-102_00711                                    | Y                             | 100%          | 100%                          | 554       | cysC    | putative adenyllyl-sulfate kinase                                            |
| Mv_NIES-102_00966                                    | Y                             | 100%          | 100%                          | 773       | cysE    | Serine acetyltransferase                                                     |

| Representative gene<br>(Mv_NIES-102 as<br>reference) | Used for core<br>genome tree? | %<br>presence | % intact &<br>single-<br>copy | No.<br>BP | Name    | Product                                                       |
|------------------------------------------------------|-------------------------------|---------------|-------------------------------|-----------|---------|---------------------------------------------------------------|
| Mv_NIES-102_04870                                    | Y                             | 100%          | 100%                          | 821       | cysH    | Phosphoadenosine phosphosulfate reductase                     |
| Mv_NIES-102_03387                                    | Y                             | 100%          | 100%                          | 959       | cysK1_2 | O-acetylserine sulfhydrylase                                  |
| Mv_NIES-102_05266                                    | Y                             | 100%          | 100%                          | 275       | cysO    | Sulfur carrier protein CysO                                   |
| Mv_NIES-102_04297                                    | Y                             | 100%          | 100%                          | 812       | cysQ_1  | 3'(2')%2C5'-bisphosphate nucleotidase CysQ                    |
| Mv_NIES-102_04861                                    | Y                             | 100%          | 100%                          | 875       | cysQ_2  | 3'(2')%2C5'-bisphosphate nucleotidase CysQ                    |
| Mv_NIES-102_00479                                    | Y                             | 100%          | 100%                          | 1442      | cysS    | Cysteine--tRNA ligase                                         |
| Mv_NIES-102_00726                                    | Y                             | 100%          | 100%                          | 842       | cysT    | Sulfate transport system permease protein CysT                |
| Mv_NIES-102_00725                                    | Y                             | 100%          | 100%                          | 842       | cysW    | Sulfate transport system permease protein CysW                |
| Mv_NIES-102_02095                                    | Y                             | 100%          | 100%                          | 1424      | dac     | D-alanyl-D-alanine carboxypeptidase                           |
| Mv_NIES-102_05044                                    | Y                             | 100%          | 100%                          | 830       | dapB    | 4-hydroxy-tetrahydrodipicolinate reductase                    |
| Mv_NIES-102_03316                                    | Y                             | 100%          | 100%                          | 905       | dapF    | Diaminopimelate epimerase                                     |
| Mv_NIES-102_01935                                    | Y                             | 100%          | 100%                          | 1187      | dapL_1  | LL-diaminopimelate aminotransferase                           |
| Mv_NIES-102_02111                                    | Y                             | 100%          | 100%                          | 1235      | dapL_2  | LL-diaminopimelate aminotransferase                           |
| Mv_NIES-102_03357                                    | Y                             | 100%          | 100%                          | 692       | ddpX    | D-alanyl-D-alanine dipeptidase                                |
| Mv_NIES-102_03743                                    | Y                             | 100%          | 100%                          | 1358      | der_2   | GTPase Der                                                    |
| Mv_NIES-102_04206                                    | Y                             | 100%          | 100%                          | 1364      | der_3   | GTPase Der                                                    |
| Mv_NIES-102_01034                                    | Y                             | 100%          | 100%                          | 1037      | desA_1  | Delta(12)-fatty-acid desaturase                               |
| Mv_NIES-102_02752                                    | Y                             | 100%          | 100%                          | 1040      | desA_2  | Delta(12)-fatty-acid desaturase                               |
| Mv_NIES-102_05477                                    | Y                             | 100%          | 100%                          | 842       | dhaA    | Haloalkane dehalogenase                                       |
| Mv_NIES-102_02822                                    | Y                             | 100%          | 100%                          | 1508      | dinG    | 3'-5' exonuclease DinG                                        |
| Mv_NIES-102_03356                                    | Y                             | 100%          | 100%                          | 404       | divK    | Polar-differentiation response regulator DivK                 |
| Mv_NIES-102_01453                                    | Y                             | 100%          | 100%                          | 2624      | dnaE    | DNA polymerase III subunit alpha                              |
| Mv_NIES-102_01302                                    | Y                             | 100%          | 100%                          | 1337      | dnaE2   | Error-prone DNA polymerase                                    |
| Mv_NIES-102_01981                                    | Y                             | 100%          | 100%                          | 1880      | dnaG    | DNA primase                                                   |
| Mv_NIES-102_01257                                    | Y                             | 100%          | 100%                          | 1265      | dnaJ_2  | Chaperone protein DnaJ                                        |
| Mv_NIES-102_02377                                    | Y                             | 100%          | 100%                          | 1124      | dnaJ_3  | Chaperone protein DnaJ                                        |
| Mv_NIES-102_04028                                    | Y                             | 100%          | 100%                          | 689       | dnaJ_4  | Chaperone protein DnaJ                                        |
| Mv_NIES-102_04062                                    | Y                             | 100%          | 100%                          | 770       | dnaJ_5  | Chaperone protein DnaJ                                        |
| Mv_NIES-102_04630                                    | Y                             | 100%          | 100%                          | 494       | dnaJ_6  | Chaperone protein DnaJ                                        |
| Mv_NIES-102_05510                                    | Y                             | 100%          | 100%                          | 1007      | dnaJ_7  | Chaperone protein DnaJ                                        |
| Mv_NIES-102_05242                                    | Y                             | 100%          | 100%                          | 1595      | dnaK_2  | Chaperone protein DnaK                                        |
| Mv_NIES-102_04964                                    | Y                             | 100%          | 100%                          | 1904      | dnaK2_1 | Chaperone protein dnaK2                                       |
| Mv_NIES-102_05160                                    | Y                             | 100%          | 100%                          | 2162      | dnaK2_2 | Chaperone protein dnaK2                                       |
| Mv_NIES-102_05440                                    | Y                             | 100%          | 100%                          | 914       | dpmM_4  | Modification methylase DpmIIA                                 |
| Mv_NIES-102_02062                                    | Y                             | 100%          | 100%                          | 1616      | dppA    | Periplasmic dipeptide transport protein                       |
| Mv_NIES-102_01608                                    | Y                             | 100%          | 100%                          | 1061      | dppB_1  | Dipeptide transport system permease protein DppB              |
| Mv_NIES-102_00206                                    | Y                             | 100%          | 100%                          | 728       | dsbD    | Thiol:disulfide interchange protein DsbD                      |
| Mv_NIES-102_02828                                    | Y                             | 100%          | 100%                          | 779       | dtd3    | D-aminoacyl-tRNA deacylase                                    |
| Mv_NIES-102_00451                                    | Y                             | 100%          | 100%                          | 1070      | dusA    | tRNA-dihydrouridine(20/20a) synthase                          |
| Mv_NIES-102_02462                                    | Y                             | 100%          | 100%                          | 1172      | dxr     | 1-deoxy-D-xylulose 5-phosphate reductoisomerase               |
| Mv_NIES-102_03551                                    | Y                             | 100%          | 100%                          | 1901      | dxs_1   | 1-deoxy-D-xylulose-5-phosphate synthase                       |
| Mv_NIES-102_05460                                    | Y                             | 100%          | 100%                          | 668       | ecfA1   | Energy-coupling factor transporter ATP-binding protein EcfA1  |
| Mv_NIES-102_03428                                    | Y                             | 100%          | 100%                          | 773       | ecfT_1  | Energy-coupling factor transporter transmembrane protein EcfT |
| Mv_NIES-102_03744                                    | Y                             | 100%          | 100%                          | 875       | ecfT_2  | Energy-coupling factor transporter transmembrane protein EcfT |
| Mv_NIES-102_00506                                    | Y                             | 100%          | 100%                          | 920       | efeU    | Ferrous iron permease EfeU                                    |
| Mv_NIES-102_01753                                    | Y                             | 100%          | 100%                          | 1355      | egtB_6  | Hercynine oxygenase                                           |
| Mv_NIES-102_01752                                    | Y                             | 100%          | 100%                          | 1010      | egtD    | Histidine N-alpha-methyltransferase                           |
| Mv_NIES-102_01085                                    | Y                             | 100%          | 100%                          | 1298      | eno     | Enolase                                                       |
| Mv_NIES-102_02632                                    | Y                             | 100%          | 100%                          | 551       | estB_1  | Carboxylesterase 2                                            |

| Representative gene<br>(Mv_NIES-102 as<br>reference) | Used for core<br>genome tree? | %<br>presence | % intact &<br>single-<br>copy | No.<br>BP | Name    | Product                                                             |
|------------------------------------------------------|-------------------------------|---------------|-------------------------------|-----------|---------|---------------------------------------------------------------------|
| Mv_NIES-102_04435                                    | Y                             | 100%          | 100%                          | 578       | estB_2  | Extracellular esterase EstB                                         |
| Mv_NIES-102_04016                                    | Y                             | 100%          | 100%                          | 1889      | ettA    | Energy-dependent translational throttle protein EttA                |
| Mv_NIES-102_04379                                    | Y                             | 100%          | 100%                          | 800       | exoA    | Exodeoxyribonuclease                                                |
| Mv_NIES-102_05492                                    | Y                             | 100%          | 100%                          | 926       | fabD    | Malonyl CoA-acyl carrier protein transacylase                       |
| Mv_NIES-102_01978                                    | Y                             | 100%          | 100%                          | 1124      | fabF_1  | 3-oxoacyl-[acyl-carrier-protein] synthase 2                         |
| Mv_NIES-102_05076                                    | Y                             | 100%          | 100%                          | 1250      | fabF_2  | 3-oxoacyl-[acyl-carrier-protein] synthase 2                         |
| Mv_NIES-102_00958                                    | Y                             | 100%          | 100%                          | 764       | fabG_1  | 3-oxoacyl-[acyl-carrier-protein] reductase                          |
| Mv_NIES-102_05493                                    | Y                             | 100%          | 100%                          | 1001      | fabH    | 3-oxoacyl-[acyl-carrier-protein] synthase 3                         |
| Mv_NIES-102_03862                                    | Y                             | 100%          | 100%                          | 776       | fabI    | Enoyl-[acyl-carrier-protein] reductase [NADH] FabI                  |
| Mv_NIES-102_03181                                    | Y                             | 100%          | 100%                          | 479       | fabZ    | 3-hydroxyacyl-[acyl-carrier-protein] dehydratase FabZ               |
| Mv_NIES-102_01943                                    | Y                             | 100%          | 100%                          | 1136      | fbtC_1  | FO synthase                                                         |
| Mv_NIES-102_04199                                    | Y                             | 100%          | 100%                          | 887       | fbtC_2  | FO synthase                                                         |
| Mv_NIES-102_00093                                    | Y                             | 100%          | 100%                          | 1046      | fbp     | Fructose-1%2C6-bisphosphatase class 1                               |
| Mv_NIES-102_00612                                    | Y                             | 100%          | 100%                          | 938       | fcl     | GDP-L-fucose synthase                                               |
| Mv_NIES-102_00811                                    | Y                             | 100%          | 100%                          | 1079      | fda     | Fructose-bisphosphate aldolase                                      |
| Mv_NIES-102_00191                                    | Y                             | 100%          | 100%                          | 776       | fetB    | putative iron export permease protein FetB                          |
| Mv_NIES-102_02761                                    | Y                             | 100%          | 100%                          | 1436      | ffh     | Signal recognition particle protein                                 |
| Mv_NIES-102_05647                                    | Y                             | 100%          | 100%                          | 1109      | flhA    | S-(hydroxymethyl)glutathione dehydrogenase                          |
| Mv_NIES-102_02687                                    | Y                             | 100%          | 100%                          | 977       | fnt     | Methionyl-tRNA formyltransferase                                    |
| Mv_NIES-102_03969                                    | Y                             | 100%          | 100%                          | 356       | folB    | Dihydroneopterin aldolase                                           |
| Mv_NIES-102_02134                                    | Y                             | 100%          | 100%                          | 896       | folD    | Bifunctional protein FolD protein                                   |
| Mv_NIES-102_01164                                    | Y                             | 100%          | 100%                          | 698       | folE_1  | GTP cyclohydrolase 1                                                |
| Mv_NIES-102_04205                                    | Y                             | 100%          | 100%                          | 464       | folK    | 2-amino-4-hydroxy-6-hydroxymethyldihydropteridine pyrophosphokinase |
| Mv_NIES-102_04323                                    | Y                             | 100%          | 100%                          | 842       | folP    | Dihydropteroate synthase                                            |
| Mv_NIES-102_03183                                    | Y                             | 100%          | 100%                          | 476       | fosB    | Metallothiol transferase FosB                                       |
| Mv_NIES-102_05164                                    | Y                             | 100%          | 100%                          | 1346      | fpgS    | Folylpolylglutamate synthase                                        |
| Mv_NIES-102_03782                                    | Y                             | 100%          | 100%                          | 224       | fprB    | putative ferredoxin/ferredoxin--NADP reductase                      |
| Mv_NIES-102_02995                                    | Y                             | 100%          | 100%                          | 1727      | frdA    | Fumarate reductase flavoprotein subunit                             |
| Mv_NIES-102_05438                                    | Y                             | 100%          | 100%                          | 389       | frp     | Fluorescence recovery protein                                       |
| Mv_NIES-102_00661                                    | Y                             | 100%          | 100%                          | 548       | frr     | Ribosome-recycling factor                                           |
| Mv_NIES-102_02546                                    | Y                             | 100%          | 100%                          | 359       | ftrC    | Ferredoxin-thioredoxin reductase%2C catalytic chain                 |
| Mv_NIES-102_03786                                    | Y                             | 100%          | 100%                          | 236       | ftrV    | Ferredoxin-thioredoxin reductase%2C variable chain                  |
| Mv_NIES-102_00346                                    | Y                             | 100%          | 100%                          | 1511      | ftsH_1  | ATP-dependent zinc metalloprotease FtsH                             |
| Mv_NIES-102_01318                                    | Y                             | 100%          | 100%                          | 1844      | ftsH_3  | ATP-dependent zinc metalloprotease FtsH                             |
| Mv_NIES-102_05026                                    | Y                             | 100%          | 100%                          | 1895      | ftsH1   | ATP-dependent zinc metalloprotease FtsH 1                           |
| Mv_NIES-102_02553                                    | Y                             | 100%          | 100%                          | 1886      | ftsH2   | ATP-dependent zinc metalloprotease FtsH 2                           |
| Mv_NIES-102_04057                                    | Y                             | 100%          | 100%                          | 1853      | ftsH3   | ATP-dependent zinc metalloprotease FtsH 3                           |
| Mv_NIES-102_03575                                    | Y                             | 100%          | 100%                          | 1877      | ftsH4_1 | ATP-dependent zinc metalloprotease FtsH 4                           |
| Mv_NIES-102_03871                                    | Y                             | 100%          | 100%                          | 1964      | ftsH4_2 | ATP-dependent zinc metalloprotease FtsH 4                           |
| Mv_NIES-102_05253                                    | Y                             | 100%          | 100%                          | 1187      | ftsW    | putative peptidoglycan glycosyltransferase FtsW                     |
| Mv_NIES-102_04144                                    | Y                             | 100%          | 100%                          | 1334      | ftsY    | Signal recognition particle receptor FtsY                           |
| Mv_NIES-102_04334                                    | Y                             | 100%          | 100%                          | 1403      | fumC    | Fumarate hydratase class II                                         |
| Mv_NIES-102_01801                                    | Y                             | 100%          | 100%                          | 2075      | fusA_1  | Elongation factor G                                                 |
| Mv_NIES-102_02965                                    | Y                             | 100%          | 100%                          | 2033      | fusA_2  | Elongation factor G                                                 |
| Mv_NIES-102_03611                                    | Y                             | 100%          | 100%                          | 998       | galE    | UDP-glucose 4-epimerase                                             |
| Mv_NIES-102_01065                                    | Y                             | 100%          | 100%                          | 1034      | gap1    | Glyceraldehyde-3-phosphate dehydrogenase 1                          |
| Mv_NIES-102_02093                                    | Y                             | 100%          | 100%                          | 1352      | garB    | Glutathione amide reductase                                         |
| Mv_NIES-102_04293                                    | Y                             | 100%          | 100%                          | 869       | garR_2  | 2-hydroxy-3-oxopropionate reductase                                 |
| Mv_NIES-102_04065                                    | Y                             | 100%          | 100%                          | 1472      | gatB    | Aspartyl/glutamyl-tRNA(Asn/Gln) amidotransferase subunit B          |

| Representative gene<br>(Mv_NIES-102 as<br>reference) | Used for core<br>genome tree? | %<br>presence | % intact &<br>single-<br>copy | No.<br>BP | Name    | Product                                                              |
|------------------------------------------------------|-------------------------------|---------------|-------------------------------|-----------|---------|----------------------------------------------------------------------|
| Mv_NIES-102_03005                                    | Y                             | 100%          | 100%                          | 803       | gatD    | Lipid II isoglutaminyl synthase (glutamine-hydrolyzing) subunit GatD |
| Mv_NIES-102_04462                                    | Y                             | 100%          | 100%                          | 1322      | gdhA    | Glutamate dehydrogenase                                              |
| Mv_NIES-102_00262                                    | Y                             | 100%          | 100%                          | 1109      | gldA    | Glycerol dehydrogenase                                               |
| Mv_NIES-102_02096                                    | Y                             | 100%          | 100%                          | 1478      | glgA_1  | Glycogen synthase                                                    |
| Mv_NIES-102_04280                                    | Y                             | 100%          | 100%                          | 1427      | glgA_2  | Glycogen synthase                                                    |
| Mv_NIES-102_02790                                    | Y                             | 100%          | 100%                          | 2279      | glgB    | 1%2C4-alpha-glucan branching enzyme GlgB                             |
| Mv_NIES-102_00449                                    | Y                             | 100%          | 100%                          | 1289      | glgC    | Glucose-1-phosphate adenylyltransferase                              |
| Mv_NIES-102_01083                                    | Y                             | 100%          | 100%                          | 2078      | glgX_1  | Glycogen operon protein GlgX                                         |
| Mv_NIES-102_00383                                    | Y                             | 100%          | 100%                          | 1046      | glk     | Glucokinase                                                          |
| Mv_NIES-102_02350                                    | Y                             | 100%          | 100%                          | 1439      | glmM    | Phosphoglucosamine mutase                                            |
| Mv_NIES-102_00375                                    | Y                             | 100%          | 100%                          | 1901      | glmS    | Glutamine--fructose-6-phosphate aminotransferase [isomerizing]       |
| Mv_NIES-102_03338                                    | Y                             | 100%          | 100%                          | 1358      | glmU    | Bifunctional protein GlmU                                            |
| Mv_NIES-102_04539                                    | Y                             | 100%          | 100%                          | 2171      | glnA_1  | Glutamine synthetase                                                 |
| Mv_NIES-102_05472                                    | Y                             | 100%          | 100%                          | 1421      | glnA_2  | Glutamine synthetase                                                 |
| Mv_NIES-102_03108                                    | Y                             | 100%          | 100%                          | 338       | glnB    | Nitrogen regulatory protein P-II                                     |
| Mv_NIES-102_00339                                    | Y                             | 100%          | 100%                          | 755       | glnQ_1  | Glutamine transport ATP-binding protein GlnQ                         |
| Mv_NIES-102_01177                                    | Y                             | 100%          | 100%                          | 749       | glnQ_2  | Glutamine transport ATP-binding protein GlnQ                         |
| Mv_NIES-102_03303                                    | Y                             | 100%          | 100%                          | 728       | glnQ_3  | Glutamine transport ATP-binding protein GlnQ                         |
| Mv_NIES-102_04186                                    | Y                             | 100%          | 100%                          | 1139      | gltA    | Citrate synthase                                                     |
| Mv_NIES-102_05072                                    | Y                             | 100%          | 100%                          | 1484      | gltB_2  | Glutamate synthase [NADPH] small chain                               |
| Mv_NIES-102_01186                                    | Y                             | 100%          | 100%                          | 899       | gltI_1  | Glutamate/aspartate import solute-binding protein                    |
| Mv_NIES-102_04060                                    | Y                             | 100%          | 100%                          | 857       | gltI_4  | Glutamate/aspartate import solute-binding protein                    |
| Mv_NIES-102_00538                                    | Y                             | 100%          | 100%                          | 4604      | gltS_1  | Ferredoxin-dependent glutamate synthase 2                            |
| Mv_NIES-102_02664                                    | Y                             | 100%          | 100%                          | 1442      | gltX    | Glutamate--tRNA ligase                                               |
| Mv_NIES-102_01421                                    | Y                             | 100%          | 100%                          | 1283      | glyA    | Serine hydroxymethyltransferase                                      |
| Mv_NIES-102_01797                                    | Y                             | 100%          | 100%                          | 875       | glyQ    | Glycine--tRNA ligase alpha subunit                                   |
| Mv_NIES-102_02331                                    | Y                             | 100%          | 100%                          | 2132      | glyS    | Glycine--tRNA ligase beta subunit                                    |
| Mv_NIES-102_03993                                    | Y                             | 100%          | 100%                          | 953       | gmd_2   | GDP-mannose 4%2C6-dehydratase                                        |
| Mv_NIES-102_04785                                    | Y                             | 100%          | 100%                          | 554       | gmK     | Guanylate kinase                                                     |
| Mv_NIES-102_03490                                    | Y                             | 100%          | 100%                          | 749       | gph_3   | Phosphoglycolate phosphatase                                         |
| Mv_NIES-102_04077                                    | Y                             | 100%          | 100%                          | 722       | gph_4   | Phosphoglycolate phosphatase                                         |
| Mv_NIES-102_04251                                    | Y                             | 100%          | 100%                          | 1337      | gpmA    | 2%2C3-bisphosphoglycerate-dependent phosphoglycerate mutase          |
| Mv_NIES-102_00803                                    | Y                             | 100%          | 100%                          | 1598      | gpmI    | 2%2C3-bisphosphoglycerate-independent phosphoglycerate mutase        |
| Mv_NIES-102_00695                                    | Y                             | 100%          | 100%                          | 929       | gpsA    | Glycerol-3-phosphate dehydrogenase [NAD(P)+]                         |
| Mv_NIES-102_02876                                    | Y                             | 100%          | 100%                          | 494       | gpt     | Xanthine phosphoribosyltransferase                                   |
| Mv_NIES-102_02077                                    | Y                             | 100%          | 100%                          | 1625      | groL1   | 60 kDa chaperonin 1                                                  |
| Mv_NIES-102_04015                                    | Y                             | 100%          | 100%                          | 1682      | groL2   | 60 kDa chaperonin 2                                                  |
| Mv_NIES-102_02076                                    | Y                             | 100%          | 100%                          | 311       | groS    | 10 kDa chaperonin                                                    |
| Mv_NIES-102_04078                                    | Y                             | 100%          | 100%                          | 722       | grpE    | Protein GrpE                                                         |
| Mv_NIES-102_02781                                    | Y                             | 100%          | 100%                          | 323       | grxD    | Glutaredoxin 4                                                       |
| Mv_NIES-102_02718                                    | Y                             | 100%          | 100%                          | 1625      | gsiA_2  | Glutathione import ATP-binding protein GsiA                          |
| Mv_NIES-102_00204                                    | Y                             | 100%          | 100%                          | 956       | gsiC    | Glutathione transport system permease protein GsiC                   |
| Mv_NIES-102_05275                                    | Y                             | 100%          | 100%                          | 1625      | guaA    | GMP synthase [glutamine-hydrolyzing]                                 |
| Mv_NIES-102_03354                                    | Y                             | 100%          | 100%                          | 872       | gyrA_1  | DNA gyrase subunit A                                                 |
| Mv_NIES-102_03355                                    | Y                             | 100%          | 100%                          | 1772      | gyrA_2  | DNA gyrase subunit A                                                 |
| Mv_NIES-102_04125                                    | Y                             | 100%          | 100%                          | 2552      | gyrA_3  | DNA gyrase subunit A                                                 |
| Mv_NIES-102_05278                                    | Y                             | 100%          | 100%                          | 1262      | haeIIIM | Modification methylase HaeIII                                        |
| Mv_NIES-102_04333                                    | Y                             | 100%          | 100%                          | 2327      | hcf136  | Ycf48-like protein                                                   |
| Mv_NIES-102_04568                                    | Y                             | 100%          | 100%                          | 971       | hdfR_2  | HTH-type transcriptional regulator HdfR                              |

| Representative gene<br>(Mv_NIES-102 as<br>reference) | Used for core<br>genome tree? | %<br>presence | % intact &<br>single-<br>copy | No.<br>BP | Name    | Product                                                                                            |
|------------------------------------------------------|-------------------------------|---------------|-------------------------------|-----------|---------|----------------------------------------------------------------------------------------------------|
| Mv_NIES-102_04907                                    | Y                             | 100%          | 100%                          | 2927      | helY    | putative helicase HelY                                                                             |
| Mv_NIES-102_00622                                    | Y                             | 100%          | 100%                          | 1286      | hemA    | Glutamyl-tRNA reductase                                                                            |
| Mv_NIES-102_01525                                    | Y                             | 100%          | 100%                          | 986       | hemB_1  | Delta-aminolevulinic acid dehydratase                                                              |
| Mv_NIES-102_00708                                    | Y                             | 100%          | 100%                          | 1052      | hemE    | Uroporphyrinogen decarboxylase                                                                     |
| Mv_NIES-102_04316                                    | Y                             | 100%          | 100%                          | 1022      | hemF    | Oxygen-dependent coproporphyrinogen-III oxidase                                                    |
| Mv_NIES-102_01014                                    | Y                             | 100%          | 100%                          | 1139      | hemH_1  | Ferrochelatase                                                                                     |
| Mv_NIES-102_04590                                    | Y                             | 100%          | 100%                          | 1163      | hemH_2  | Ferrochelatase                                                                                     |
| Mv_NIES-102_01405                                    | Y                             | 100%          | 100%                          | 1235      | hemL_2  | Glutamate-1-semialdehyde 2%2C1-aminomutase                                                         |
| Mv_NIES-102_03670                                    | Y                             | 100%          | 100%                          | 971       | hepT    | Heptaprenyl diphosphate synthase component 2                                                       |
| Mv_NIES-102_03009                                    | Y                             | 100%          | 100%                          | 995       | hhoB    | Putative serine protease HhoB                                                                      |
| Mv_NIES-102_02837                                    | Y                             | 100%          | 100%                          | 761       | hisA    | 1-(5-phosphoribosyl)-5-[(5-phosphoribosylamino)methylideneamino] imidazole-4-carboxamide isomerase |
| Mv_NIES-102_00461                                    | Y                             | 100%          | 100%                          | 1046      | hisC    | Histidinol-phosphate aminotransferase                                                              |
| Mv_NIES-102_05235                                    | Y                             | 100%          | 100%                          | 1256      | hisD_1  | Histidinol dehydrogenase                                                                           |
| Mv_NIES-102_05665                                    | Y                             | 100%          | 100%                          | 1304      | hisD_2  | Histidinol dehydrogenase                                                                           |
| Mv_NIES-102_02696                                    | Y                             | 100%          | 100%                          | 764       | hisF    | Imidazole glycerol phosphate synthase subunit HisF                                                 |
| Mv_NIES-102_03489                                    | Y                             | 100%          | 100%                          | 650       | hisG    | ATP phosphoribosyltransferase                                                                      |
| Mv_NIES-102_03700                                    | Y                             | 100%          | 100%                          | 638       | hisH    | Imidazole glycerol phosphate synthase subunit HisH                                                 |
| Mv_NIES-102_02002                                    | Y                             | 100%          | 100%                          | 1298      | hom     | Homoserine dehydrogenase                                                                           |
| Mv_NIES-102_03161                                    | Y                             | 100%          | 100%                          | 716       | hoxU    | NAD-reducing hydrogenase HoxS subunit gamma                                                        |
| Mv_NIES-102_03158                                    | Y                             | 100%          | 100%                          | 548       | hoxY    | NAD-reducing hydrogenase HoxS subunit delta                                                        |
| Mv_NIES-102_04752                                    | Y                             | 100%          | 100%                          | 599       | hpf     | Ribosome hibernation promotion factor                                                              |
| Mv_NIES-102_02763                                    | Y                             | 100%          | 100%                          | 914       | hslO    | 33 kDa chaperonin                                                                                  |
| Mv_NIES-102_02043                                    | Y                             | 100%          | 100%                          | 461       | hspA    | Spore protein SP21                                                                                 |
| Mv_NIES-102_01544                                    | Y                             | 100%          | 100%                          | 2042      | htpG    | Chaperone protein HtpG                                                                             |
| Mv_NIES-102_01988                                    | Y                             | 100%          | 100%                          | 848       | htpX_1  | Protease HtpX                                                                                      |
| Mv_NIES-102_02722                                    | Y                             | 100%          | 100%                          | 965       | htpX_3  | Protease HtpX                                                                                      |
| Mv_NIES-102_01685                                    | Y                             | 100%          | 100%                          | 284       | hup     | DNA-binding protein HU                                                                             |
| Mv_NIES-102_03535                                    | Y                             | 100%          | 100%                          | 2264      | hypF    | Carbamoyltransferase HypF                                                                          |
| Mv_NIES-102_03618                                    | Y                             | 100%          | 100%                          | 1436      | icd     | Isocitrate dehydrogenase [NADP]                                                                    |
| Mv_NIES-102_04729                                    | Y                             | 100%          | 100%                          | 2858      | ileS    | Isoleucine--tRNA ligase                                                                            |
| Mv_NIES-102_00653                                    | Y                             | 100%          | 100%                          | 1511      | ilvA    | L-threonine dehydratase biosynthetic IlvA                                                          |
| Mv_NIES-102_02499                                    | Y                             | 100%          | 100%                          | 1853      | ilvB1   | Acetolactate synthase large subunit IlvB1                                                          |
| Mv_NIES-102_00503                                    | Y                             | 100%          | 100%                          | 1685      | ilvD    | Dihydroxy-acid dehydratase                                                                         |
| Mv_NIES-102_01440                                    | Y                             | 100%          | 100%                          | 812       | ilvE_1  | Branched-chain-amino-acid aminotransferase                                                         |
| Mv_NIES-102_05400                                    | Y                             | 100%          | 100%                          | 512       | IMPDH_2 | Inosine-5'-monophosphate dehydrogenase                                                             |
| Mv_NIES-102_05022                                    | Y                             | 100%          | 100%                          | 3032      | infB    | Translation initiation factor IF-2                                                                 |
| Mv_NIES-102_03557                                    | Y                             | 100%          | 100%                          | 989       | iolG_1  | Inositol 2-dehydrogenase/D-chiro-inositol 3-dehydrogenase                                          |
| Mv_NIES-102_02609                                    | Y                             | 100%          | 100%                          | 356       | iscA    | Iron-binding protein IscA                                                                          |
| Mv_NIES-102_01090                                    | Y                             | 100%          | 100%                          | 443       | iscR    | HTH-type transcriptional regulator IscR                                                            |
| Mv_NIES-102_04131                                    | Y                             | 100%          | 100%                          | 941       | ispE    | 4-diphosphocytidyl-2-C-methyl-D-erythritol kinase                                                  |
| Mv_NIES-102_00764                                    | Y                             | 100%          | 100%                          | 479       | ispF    | 2-C-methyl-D-erythritol 2%2C4-cyclodiphosphate synthase                                            |
| Mv_NIES-102_00462                                    | Y                             | 100%          | 100%                          | 1220      | ispG    | 4-hydroxy-3-methylbut-2-en-1-yl diphosphate synthase (ferredoxin)                                  |
| Mv_NIES-102_05180                                    | Y                             | 100%          | 100%                          | 1208      | ispH    | 4-hydroxy-3-methylbut-2-enyl diphosphate reductase                                                 |
| Mv_NIES-102_00746                                    | Y                             | 100%          | 100%                          | 929       | kaiA    | Circadian clock protein KaiA                                                                       |
| Mv_NIES-102_00747                                    | Y                             | 100%          | 100%                          | 314       | kaiB_1  | Circadian clock protein KaiB                                                                       |
| Mv_NIES-102_05149                                    | Y                             | 100%          | 100%                          | 746       | kaiB_3  | Circadian clock protein KaiB                                                                       |
| Mv_NIES-102_00748                                    | Y                             | 100%          | 100%                          | 1562      | kaiC_1  | Circadian clock protein kinase KaiC                                                                |
| Mv_NIES-102_01451                                    | Y                             | 100%          | 100%                          | 1520      | kaiC_2  | Circadian clock protein kinase KaiC                                                                |
| Mv_NIES-102_01229                                    | Y                             | 100%          | 100%                          | 1643      | kdc     | Alpha-keto-acid decarboxylase                                                                      |



| Representative gene<br>(Mv_NIES-102 as<br>reference) | Used for core<br>genome tree? | %<br>presence | % intact &<br>single-<br>copy | No.<br>BP | Name   | Product                                                                        |
|------------------------------------------------------|-------------------------------|---------------|-------------------------------|-----------|--------|--------------------------------------------------------------------------------|
| Mv_NIES-102_05410                                    | Y                             | 100%          | 100%                          | 689       | ktrA   | Ktr system potassium uptake protein A                                          |
| Mv_NIES-102_05411                                    | Y                             | 100%          | 100%                          | 1334      | ktrB   | Ktr system potassium uptake protein B                                          |
| Mv_NIES-102_00699                                    | Y                             | 100%          | 100%                          | 881       | lapB_1 | Lipopolysaccharide assembly protein B                                          |
| Mv_NIES-102_03271                                    | Y                             | 100%          | 100%                          | 1688      | lapB_2 | Lipopolysaccharide assembly protein B                                          |
| Mv_NIES-102_04755                                    | Y                             | 100%          | 100%                          | 1181      | larC   | Pyridinium-3%2C5-bithiocarboxylic acid mononucleotide nickel insertion protein |
| Mv_NIES-102_03881                                    | Y                             | 100%          | 100%                          | 809       | larE   | Pyridinium-3%2C5-bithiocarboxylic acid mononucleotide synthase                 |
| Mv_NIES-102_03426                                    | Y                             | 100%          | 100%                          | 743       | larMN  | putative fused nickel transport protein LarMN                                  |
| Mv_NIES-102_04196                                    | Y                             | 100%          | 100%                          | 995       | ldh    | L-lactate dehydrogenase                                                        |
| Mv_NIES-102_01531                                    | Y                             | 100%          | 100%                          | 1811      | lepA   | Elongation factor 4                                                            |
| Mv_NIES-102_03689                                    | Y                             | 100%          | 100%                          | 1085      | leuB   | 3-isopropylmalate dehydrogenase                                                |
| Mv_NIES-102_02714                                    | Y                             | 100%          | 100%                          | 1433      | leuC   | 3-isopropylmalate dehydratase large subunit                                    |
| Mv_NIES-102_01244                                    | Y                             | 100%          | 100%                          | 590       | leuD1  | 3-isopropylmalate dehydratase small subunit 1                                  |
| Mv_NIES-102_02036                                    | Y                             | 100%          | 100%                          | 2552      | leuS   | Leucine--tRNA ligase                                                           |
| Mv_NIES-102_01358                                    | Y                             | 100%          | 100%                          | 614       | lexA   | Transcription regulator LexA                                                   |
| Mv_NIES-102_03555                                    | Y                             | 100%          | 100%                          | 851       | lgt    | Phosphatidylglycerol--prolipoprotein diacylglycerol transferase                |
| Mv_NIES-102_05515                                    | Y                             | 100%          | 100%                          | 632       | liaR   | Transcriptional regulatory protein LiaR                                        |
| Mv_NIES-102_02779                                    | Y                             | 100%          | 100%                          | 884       | lipA2  | Lipoyl synthase 2                                                              |
| Mv_NIES-102_01742                                    | Y                             | 100%          | 100%                          | 701       | livF_1 | High-affinity branched-chain amino acid transport ATP-binding protein LivF     |
| Mv_NIES-102_04272                                    | Y                             | 100%          | 100%                          | 698       | livF_3 | High-affinity branched-chain amino acid transport ATP-binding protein LivF     |
| Mv_NIES-102_03556                                    | Y                             | 100%          | 100%                          | 950       | livH_1 | High-affinity branched-chain amino acid transport system permease protein LivH |
| Mv_NIES-102_03898                                    | Y                             | 100%          | 100%                          | 863       | livH_2 | High-affinity branched-chain amino acid transport system permease protein LivH |
| Mv_NIES-102_01768                                    | Y                             | 100%          | 100%                          | 875       | lnrL_1 | Linearmycin resistance ATP-binding protein LnrL                                |
| Mv_NIES-102_05591                                    | Y                             | 100%          | 100%                          | 941       | lnrL_3 | Linearmycin resistance ATP-binding protein LnrL                                |
| Mv_NIES-102_00284                                    | Y                             | 100%          | 100%                          | 1526      | lnt    | Apolipoprotein N-acyltransferase                                               |
| Mv_NIES-102_05391                                    | Y                             | 100%          | 100%                          | 638       | lon2   | Lon protease 2                                                                 |
| Mv_NIES-102_02543                                    | Y                             | 100%          | 100%                          | 728       | lptB_1 | Lipopolysaccharide export system ATP-binding protein LptB                      |
| Mv_NIES-102_03699                                    | Y                             | 100%          | 100%                          | 752       | lptB_2 | Lipopolysaccharide export system ATP-binding protein LptB                      |
| Mv_NIES-102_04273                                    | Y                             | 100%          | 100%                          | 746       | lptB_3 | Lipopolysaccharide export system ATP-binding protein LptB                      |
| Mv_NIES-102_02539                                    | Y                             | 100%          | 100%                          | 2393      | lptD_1 | LPS-assembly protein LptD                                                      |
| Mv_NIES-102_01436                                    | Y                             | 100%          | 100%                          | 836       | lpxA   | Acyl-[acyl-carrier-protein]--UDP-N-acetylglucosamine O-acyltransferase         |
| Mv_NIES-102_01437                                    | Y                             | 100%          | 100%                          | 1229      | lpxB_1 | Lipid-A-disaccharide synthase                                                  |
| Mv_NIES-102_01982                                    | Y                             | 100%          | 100%                          | 1238      | lpxB_2 | Lipid-A-disaccharide synthase                                                  |
| Mv_NIES-102_01459                                    | Y                             | 100%          | 100%                          | 812       | lpxC   | UDP-3-O-acyl-N-acetylglucosamine deacetylase                                   |
| Mv_NIES-102_01708                                    | Y                             | 100%          | 100%                          | 590       | lpxD_2 | UDP-3-O-(3-hydroxymyristoyl)glucosamine N-acyltransferase                      |
| Mv_NIES-102_05053                                    | Y                             | 100%          | 100%                          | 1031      | lpxD_3 | UDP-3-O-acylglucosamine N-acyltransferase                                      |
| Mv_NIES-102_02110                                    | Y                             | 100%          | 100%                          | 833       | lpxG   | UDP-2%2C3-diacetylglucosamine pyrophosphatase LpxG                             |
| Mv_NIES-102_03683                                    | Y                             | 100%          | 100%                          | 467       | lspA   | Lipoprotein signal peptidase                                                   |
| Mv_NIES-102_00227                                    | Y                             | 100%          | 100%                          | 1403      | lysA   | Diaminopimelate decarboxylase                                                  |
| Mv_NIES-102_00145                                    | Y                             | 100%          | 100%                          | 1220      | macA   | Macrolide export protein MacA                                                  |
| Mv_NIES-102_05207                                    | Y                             | 100%          | 100%                          | 1214      | macB_2 | Macrolide export ATP-binding/permease protein MacB                             |
| Mv_NIES-102_05376                                    | Y                             | 100%          | 100%                          | 764       | map_2  | Methionine aminopeptidase                                                      |
| Mv_NIES-102_04581                                    | Y                             | 100%          | 100%                          | 977       | mdh    | Malate dehydrogenase                                                           |
| Mv_NIES-102_00698                                    | Y                             | 100%          | 100%                          | 1478      | mdtA_1 | Multidrug resistance protein MdtA                                              |
| Mv_NIES-102_01276                                    | Y                             | 100%          | 100%                          | 1460      | mdtA_2 | Multidrug resistance protein MdtA                                              |
| Mv_NIES-102_01613                                    | Y                             | 100%          | 100%                          | 1457      | mdtA_3 | Multidrug resistance protein MdtA                                              |
| Mv_NIES-102_00044                                    | Y                             | 100%          | 100%                          | 3047      | mdtC_1 | Multidrug resistance protein MdtC                                              |
| Mv_NIES-102_01278                                    | Y                             | 100%          | 100%                          | 3065      | mdtC_2 | Multidrug resistance protein MdtC                                              |
| Mv_NIES-102_01130                                    | Y                             | 100%          | 100%                          | 911       | menA_1 | 1%2C4-dihydroxy-2-naphthoate octaprenyltransferase                             |
| Mv_NIES-102_05714                                    | Y                             | 100%          | 100%                          | 980       | menA_2 | 1%2C4-dihydroxy-2-naphthoate octaprenyltransferase                             |

| Representative gene<br>(Mv_NIES-102 as<br>reference) | Used for core<br>genome tree? | %<br>presence | % intact &<br>single-<br>copy | No.<br>BP | Name    | Product                                                           |
|------------------------------------------------------|-------------------------------|---------------|-------------------------------|-----------|---------|-------------------------------------------------------------------|
| Mv_NIES-102_02058                                    | Y                             | 100%          | 100%                          | 833       | menB    | 1%2C4-dihydroxy-2-naphthoyl-CoA synthase                          |
| Mv_NIES-102_03204                                    | Y                             | 100%          | 100%                          | 1373      | menE_3  | 2-succinylbenzoate--CoA ligase                                    |
| Mv_NIES-102_01328                                    | Y                             | 100%          | 100%                          | 698       | menG    | Demethylmenaquinone methyltransferase                             |
| Mv_NIES-102_03445                                    | Y                             | 100%          | 100%                          | 827       | menH_1  | 2-succinyl-6-hydroxy-2%2C4-cyclohexadiene-1-carboxylate synthase  |
| Mv_NIES-102_01774                                    | Y                             | 100%          | 100%                          | 1385      | merA_1  | Mercuric reductase                                                |
| Mv_NIES-102_05777                                    | Y                             | 100%          | 100%                          | 1547      | merA_2  | Mercuric reductase                                                |
| Mv_NIES-102_01808                                    | Y                             | 100%          | 100%                          | 1613      | metG    | Methionine--tRNA ligase                                           |
| Mv_NIES-102_05663                                    | Y                             | 100%          | 100%                          | 3563      | metH    | Methionine synthase                                               |
| Mv_NIES-102_02067                                    | Y                             | 100%          | 100%                          | 1430      | metK    | S-adenosylmethionine synthase                                     |
| Mv_NIES-102_05610                                    | Y                             | 100%          | 100%                          | 3482      | mfd     | Transcription-repair-coupling factor                              |
| Mv_NIES-102_03231                                    | Y                             | 100%          | 100%                          | 1235      | MgdE    | Monoglucosyldiacylglycerol epimerase                              |
| Mv_NIES-102_04353                                    | Y                             | 100%          | 100%                          | 1133      | mgtA    | GDP-mannose-dependent alpha-mannosyltransferase                   |
| Mv_NIES-102_04058                                    | Y                             | 100%          | 100%                          | 947       | miaA    | tRNA dimethylallyltransferase                                     |
| Mv_NIES-102_02240                                    | Y                             | 100%          | 100%                          | 1340      | miaB_1  | tRNA-2-methylthio-N(6)-dimethylallyl-adenosine synthase           |
| Mv_NIES-102_01426                                    | Y                             | 100%          | 100%                          | 833       | minC    | septum site-determining protein MinC                              |
| Mv_NIES-102_01425                                    | Y                             | 100%          | 100%                          | 800       | minD    | Septum site-determining protein MinD                              |
| Mv_NIES-102_01424                                    | Y                             | 100%          | 100%                          | 287       | minE    | Cell division topological specificity factor                      |
| Mv_NIES-102_01120                                    | Y                             | 100%          | 100%                          | 779       | mkl     | putative ribonucleotide transport ATP-binding protein mkl         |
| Mv_NIES-102_04803                                    | Y                             | 100%          | 100%                          | 794       | mlaE_2  | Intermembrane phospholipid transport system permease protein MlaE |
| Mv_NIES-102_03964                                    | Y                             | 100%          | 100%                          | 1091      | mmpA    | Metalloprotease MmpA                                              |
| Mv_NIES-102_04242                                    | Y                             | 100%          | 100%                          | 1118      | mnaA    | UDP-N-acetylglucosamine 2-epimerase                               |
| Mv_NIES-102_02313                                    | Y                             | 100%          | 100%                          | 1373      | mnmE_1  | tRNA modification GTPase MnmE                                     |
| Mv_NIES-102_04222                                    | Y                             | 100%          | 100%                          | 1568      | mnmE_2  | tRNA modification GTPase MnmE                                     |
| Mv_NIES-102_04145                                    | Y                             | 100%          | 100%                          | 800       | mntB_1  | Manganese transport system ATP-binding protein MntB               |
| Mv_NIES-102_00268                                    | Y                             | 100%          | 100%                          | 572       | mntP    | putative manganese efflux pump MntP                               |
| Mv_NIES-102_03038                                    | Y                             | 100%          | 100%                          | 1016      | moaA_1  | GTP 3%2C8-cyclase                                                 |
| Mv_NIES-102_04632                                    | Y                             | 100%          | 100%                          | 977       | moaA_3  | GTP 3%2C8-cyclase                                                 |
| Mv_NIES-102_01704                                    | Y                             | 100%          | 100%                          | 503       | moaB    | Molybdenum cofactor biosynthesis protein B                        |
| Mv_NIES-102_04458                                    | Y                             | 100%          | 100%                          | 443       | moaE    | Molybdopterin synthase catalytic subunit                          |
| Mv_NIES-102_01258                                    | Y                             | 100%          | 100%                          | 614       | mobA    | putative molybdenum cofactor guanylyltransferase                  |
| Mv_NIES-102_00473                                    | Y                             | 100%          | 100%                          | 800       | mprA_2  | Response regulator MprA                                           |
| Mv_NIES-102_03697                                    | Y                             | 100%          | 100%                          | 656       | mprA_3  | Response regulator MprA                                           |
| Mv_NIES-102_03758                                    | Y                             | 100%          | 100%                          | 1067      | mraY    | Phospho-N-acetylmuramoyl-pentapeptide-transferase                 |
| Mv_NIES-102_04959                                    | Y                             | 100%          | 100%                          | 1931      | mrcA    | Penicillin-binding protein 1A                                     |
| Mv_NIES-102_05646                                    | Y                             | 100%          | 100%                          | 1874      | mrda    | Peptidoglycan D%2CD-transpeptidase MrdA                           |
| Mv_NIES-102_00118                                    | Y                             | 100%          | 100%                          | 1280      | mrdb    | Peptidoglycan glycosyltransferase MrdB                            |
| Mv_NIES-102_01442                                    | Y                             | 100%          | 100%                          | 1037      | mreB    | Cell shape-determining protein MreB                               |
| Mv_NIES-102_01529                                    | Y                             | 100%          | 100%                          | 1814      | msbA    | Lipid A export ATP-binding/permease protein MsbA                  |
| Mv_NIES-102_05456                                    | Y                             | 100%          | 100%                          | 1202      | mshA_11 | D-inositol-3-phosphate glycosyltransferase                        |
| Mv_NIES-102_05612                                    | Y                             | 100%          | 100%                          | 1097      | mshA_12 | D-inositol-3-phosphate glycosyltransferase                        |
| Mv_NIES-102_05106                                    | Y                             | 100%          | 100%                          | 1070      | mshA_8  | D-inositol-3-phosphate glycosyltransferase                        |
| Mv_NIES-102_05288                                    | Y                             | 100%          | 100%                          | 662       | msrA_2  | Peptide methionine sulfoxide reductase MsrA                       |
| Mv_NIES-102_05774                                    | Y                             | 100%          | 100%                          | 983       | msrP_2  | Protein-methionine-sulfoxide reductase catalytic subunit MsrP     |
| Mv_NIES-102_01445                                    | Y                             | 100%          | 100%                          | 2609      | mtgA_1  | Biosynthetic peptidoglycan transglycosylase                       |
| Mv_NIES-102_02102                                    | Y                             | 100%          | 100%                          | 551       | mtnD    | Acireductone dioxygenase                                          |
| Mv_NIES-102_04913                                    | Y                             | 100%          | 100%                          | 1160      | mtnW    | 2%2C3-diketo-5-methylthiopentyl-1-phosphate enolase               |
| Mv_NIES-102_02534                                    | Y                             | 100%          | 100%                          | 632       | mtnX    | 2-hydroxy-3-keto-5-methylthiopentyl-1-phosphate phosphatase       |
| Mv_NIES-102_03592                                    | Y                             | 100%          | 100%                          | 1325      | murAA   | UDP-N-acetylglucosamine 1-carboxyvinyltransferase 1               |
| Mv_NIES-102_00194                                    | Y                             | 100%          | 100%                          | 878       | murB    | UDP-N-acetylenolpyruvoylglucosamine reductase                     |

| Representative gene<br>(Mv_NIES-102 as<br>reference) | Used for core<br>genome tree? | %<br>presence | % intact &<br>single-<br>copy | No.<br>BP | Name    | Product                                                                                                             |
|------------------------------------------------------|-------------------------------|---------------|-------------------------------|-----------|---------|---------------------------------------------------------------------------------------------------------------------|
| Mv_NIES-102_00193                                    | Y                             | 100%          | 100%                          | 1427      | murC    | UDP-N-acetylmuramate--L-alanine ligase                                                                              |
| Mv_NIES-102_04584                                    | Y                             | 100%          | 100%                          | 1349      | murD    | UDP-N-acetylmuramoylalanine--D-glutamate ligase                                                                     |
| Mv_NIES-102_02747                                    | Y                             | 100%          | 100%                          | 1490      | murE    | UDP-N-acetylmuramoyl-L-alanyl-D-glutamate--2%2C6-diaminopimelate ligase                                             |
| Mv_NIES-102_00026                                    | Y                             | 100%          | 100%                          | 1352      | murF    | UDP-N-acetylmuramoyl-tripeptide--D-alanyl-D-alanine ligase                                                          |
| Mv_NIES-102_05694                                    | Y                             | 100%          | 100%                          | 1073      | murG    | UDP-N-acetylglucosamine--N-acetylmuramyl-(pentapeptide) pyrophosphoryl-undecaprenol N-acetylglucosamine transferase |
| Mv_NIES-102_02926                                    | Y                             | 100%          | 100%                          | 851       | murI    | Glutamate racemase                                                                                                  |
| Mv_NIES-102_04438                                    | Y                             | 100%          | 100%                          | 920       | murQ    | N-acetylmuramic acid 6-phosphate etherase                                                                           |
| Mv_NIES-102_03006                                    | Y                             | 100%          | 100%                          | 1337      | murT    | Lipid II isoglutaminyl synthase (glutamine-hydrolyzing) subunit MurT                                                |
| Mv_NIES-102_00208                                    | Y                             | 100%          | 100%                          | 857       | mutM    | Formamidopyrimidine-DNA glycosylase                                                                                 |
| Mv_NIES-102_00050                                    | Y                             | 100%          | 100%                          | 2369      | mutS2   | Endonuclease MutS2                                                                                                  |
| Mv_NIES-102_00881                                    | Y                             | 100%          | 100%                          | 959       | nadA    | Quinolinate synthase A                                                                                              |
| Mv_NIES-102_01202                                    | Y                             | 100%          | 100%                          | 1667      | nadB    | L-aspartate oxidase                                                                                                 |
| Mv_NIES-102_05402                                    | Y                             | 100%          | 100%                          | 848       | nadC    | putative nicotinate-nucleotide pyrophosphorylase [carboxylating]                                                    |
| Mv_NIES-102_01070                                    | Y                             | 100%          | 100%                          | 566       | nadD    | putative nicotinate-nucleotide adenyltransferase                                                                    |
| Mv_NIES-102_01068                                    | Y                             | 100%          | 100%                          | 1658      | nadE    | Glutamine-dependent NAD(+) synthetase                                                                               |
| Mv_NIES-102_04318                                    | Y                             | 100%          | 100%                          | 917       | nadK_2  | NAD kinase                                                                                                          |
| Mv_NIES-102_02784                                    | Y                             | 100%          | 100%                          | 2192      | narB    | Nitrate reductase                                                                                                   |
| Mv_NIES-102_02174                                    | Y                             | 100%          | 100%                          | 800       | nasF    | Uroporphyrinogen-III C-methyltransferase                                                                            |
| Mv_NIES-102_03014                                    | Y                             | 100%          | 100%                          | 1118      | ndhA    | NAD(P)H-quinone oxidoreductase subunit 1                                                                            |
| Mv_NIES-102_02960                                    | Y                             | 100%          | 100%                          | 1541      | ndhB_2  | NAD(P)H-quinone oxidoreductase subunit 2                                                                            |
| Mv_NIES-102_05091                                    | Y                             | 100%          | 100%                          | 1853      | ndhB_3  | NAD(P)H-quinone oxidoreductase subunit 2%2C chloroplastic                                                           |
| Mv_NIES-102_04776                                    | Y                             | 100%          | 100%                          | 362       | ndhC    | NAD(P)H-quinone oxidoreductase subunit 3                                                                            |
| Mv_NIES-102_01743                                    | Y                             | 100%          | 100%                          | 1661      | ndhD1_1 | NAD(P)H-quinone oxidoreductase chain 4 1                                                                            |
| Mv_NIES-102_03203                                    | Y                             | 100%          | 100%                          | 1472      | ndhD1_2 | NAD(P)H-quinone oxidoreductase chain 4 1                                                                            |
| Mv_NIES-102_05093                                    | Y                             | 100%          | 100%                          | 1550      | ndhD1_4 | NAD(P)H-quinone oxidoreductase chain 4 1                                                                            |
| Mv_NIES-102_03013                                    | Y                             | 100%          | 100%                          | 572       | ndhI    | NAD(P)H-quinone oxidoreductase subunit I                                                                            |
| Mv_NIES-102_04778                                    | Y                             | 100%          | 100%                          | 503       | ndhJ    | NAD(P)H-quinone oxidoreductase subunit J                                                                            |
| Mv_NIES-102_04777                                    | Y                             | 100%          | 100%                          | 743       | ndhK1   | NAD(P)H-quinone oxidoreductase subunit K 1                                                                          |
| Mv_NIES-102_02663                                    | Y                             | 100%          | 100%                          | 476       | ndhN    | NAD(P)H-quinone oxidoreductase subunit N                                                                            |
| Mv_NIES-102_04582                                    | Y                             | 100%          | 100%                          | 215       | ndhO    | NAD(P)H-quinone oxidoreductase subunit O                                                                            |
| Mv_NIES-102_03458                                    | Y                             | 100%          | 100%                          | 1868      | nhaP2   | K(+)/H(+) antiporter NhaP2                                                                                          |
| Mv_NIES-102_01176                                    | Y                             | 100%          | 100%                          | 1565      | nhaS1   | Low-affinity Na(+)/H(+) antiporter NhaS1                                                                            |
| Mv_NIES-102_03235                                    | Y                             | 100%          | 100%                          | 530       | nhaX_1  | Stress response protein NhaX                                                                                        |
| Mv_NIES-102_02535                                    | Y                             | 100%          | 100%                          | 818       | nit1    | Deaminated glutathione amidase                                                                                      |
| Mv_NIES-102_01869                                    | Y                             | 100%          | 100%                          | 2312      | nrdA    | Ribonucleoside-diphosphate reductase 1 subunit alpha                                                                |
| Mv_NIES-102_01896                                    | Y                             | 100%          | 100%                          | 515       | nrdR    | Transcriptional repressor NrdR                                                                                      |
| Mv_NIES-102_01547                                    | Y                             | 100%          | 100%                          | 1424      | nrgA    | Ammonium transporter                                                                                                |
| Mv_NIES-102_03863                                    | Y                             | 100%          | 100%                          | 677       | ntcA_1  | Global nitrogen regulator                                                                                           |
| Mv_NIES-102_05392                                    | Y                             | 100%          | 100%                          | 602       | ntcA_2  | Global nitrogen regulator                                                                                           |
| Mv_NIES-102_03965                                    | Y                             | 100%          | 100%                          | 656       | nth     | Endonuclease III                                                                                                    |
| Mv_NIES-102_03012                                    | Y                             | 100%          | 100%                          | 596       | nuoJ    | NADH-quinone oxidoreductase subunit J                                                                               |
| Mv_NIES-102_00798                                    | Y                             | 100%          | 100%                          | 2051      | nuoL_2  | NADH-quinone oxidoreductase subunit L                                                                               |
| Mv_NIES-102_05024                                    | Y                             | 100%          | 100%                          | 1193      | nusA    | Transcription termination/antitermination protein NusA                                                              |
| Mv_NIES-102_00030                                    | Y                             | 100%          | 100%                          | 653       | nusB    | Transcription antitermination protein NusB                                                                          |
| Mv_NIES-102_01214                                    | Y                             | 100%          | 100%                          | 617       | nusG    | Transcription termination/antitermination protein NusG                                                              |
| Mv_NIES-102_03122                                    | Y                             | 100%          | 100%                          | 1028      | obg     | GTPase Obg                                                                                                          |
| Mv_NIES-102_05426                                    | Y                             | 100%          | 100%                          | 1337      | pabB    | Aminodeoxychorismate synthase component 1                                                                           |
| Mv_NIES-102_04902                                    | Y                             | 100%          | 100%                          | 2780      | pacL_2  | Calcium-transporting ATPase                                                                                         |
| Mv_NIES-102_02557                                    | Y                             | 100%          | 100%                          | 2330      | pacS_2  | putative copper-transporting ATPase PacS                                                                            |

| Representative gene<br>(Mv_NIES-102 as<br>reference) | Used for core<br>genome tree? | %<br>presence | % intact &<br>single-<br>copy | No.<br>BP | Name     | Product                                                                                  |
|------------------------------------------------------|-------------------------------|---------------|-------------------------------|-----------|----------|------------------------------------------------------------------------------------------|
| Mv_NIES-102_02918                                    | Y                             | 100%          | 100%                          | 767       | panB     | 3-methyl-2-oxobutanoate hydroxymethyltransferase                                         |
| Mv_NIES-102_02816                                    | Y                             | 100%          | 100%                          | 1541      | panC/cmK | Bifunctional pantoate ligase/cytidylate kinase                                           |
| Mv_NIES-102_05074                                    | Y                             | 100%          | 100%                          | 719       | pbsA1    | Heme oxygenase 1                                                                         |
| Mv_NIES-102_03876                                    | Y                             | 100%          | 100%                          | 1409      | pchA     | Salicylate biosynthesis isochorismate synthase                                           |
| Mv_NIES-102_02068                                    | Y                             | 100%          | 100%                          | 2321      | pcrA     | ATP-dependent DNA helicase PcrA                                                          |
| Mv_NIES-102_03149                                    | Y                             | 100%          | 100%                          | 1337      | pcxA_2   | Proton extrusion protein PcxA                                                            |
| Mv_NIES-102_03335                                    | Y                             | 100%          | 100%                          | 1259      | pdhC     | Dihydrolipoylysine-residue acetyltransferase component of pyruvate dehydrogenase complex |
| Mv_NIES-102_02712                                    | Y                             | 100%          | 100%                          | 1460      | pds_1    | 15-cis-phytoene desaturase                                                               |
| Mv_NIES-102_04901                                    | Y                             | 100%          | 100%                          | 1430      | pds_2    | 15-cis-phytoene desaturase                                                               |
| Mv_NIES-102_00220                                    | Y                             | 100%          | 100%                          | 1028      | pdxA2    | D-threonate 4-phosphate dehydrogenase                                                    |
| Mv_NIES-102_00099                                    | Y                             | 100%          | 100%                          | 758       | pdxJ     | Pyridoxine 5'-phosphate synthase                                                         |
| Mv_NIES-102_04905                                    | Y                             | 100%          | 100%                          | 782       | peb1A    | Major cell-binding factor                                                                |
| Mv_NIES-102_03569                                    | Y                             | 100%          | 100%                          | 1472      | pepA     | Cytosol aminopeptidase                                                                   |
| Mv_NIES-102_04931                                    | Y                             | 100%          | 100%                          | 1319      | pepP     | Xaa-Pro aminopeptidase                                                                   |
| Mv_NIES-102_05468                                    | Y                             | 100%          | 100%                          | 986       | petA     | Cytochrome f                                                                             |
| Mv_NIES-102_05467                                    | Y                             | 100%          | 100%                          | 539       | petC_2   | Cytochrome b6-f complex iron-sulfur subunit                                              |
| Mv_NIES-102_04859                                    | Y                             | 100%          | 100%                          | 1199      | petH_2   | Ferredoxin--NADP reductase                                                               |
| Mv_NIES-102_01361                                    | Y                             | 100%          | 100%                          | 1208      | pfkA     | ATP-dependent 6-phosphofructokinase                                                      |
| Mv_NIES-102_02665                                    | Y                             | 100%          | 100%                          | 1082      | pfp      | Pyrophosphate--fructose 6-phosphate 1-phosphotransferase                                 |
| Mv_NIES-102_01932                                    | Y                             | 100%          | 100%                          | 1433      | pgeA     | Phosphoglucomutase                                                                       |
| Mv_NIES-102_04737                                    | Y                             | 100%          | 100%                          | 722       | pgl      | 6-phosphogluconolactonase                                                                |
| Mv_NIES-102_02259                                    | Y                             | 100%          | 100%                          | 533       | pgsA     | CDP-diacylglycerol--glycerol-3-phosphate 3-phosphatidyltransferase                       |
| Mv_NIES-102_02440                                    | Y                             | 100%          | 100%                          | 716       | phaB     | Acetoacetyl-CoA reductase                                                                |
| Mv_NIES-102_02438                                    | Y                             | 100%          | 100%                          | 1094      | phaC     | Poly(3-hydroxyalkanoate) polymerase subunit PhaC                                         |
| Mv_NIES-102_02439                                    | Y                             | 100%          | 100%                          | 995       | phaE     | Poly(3-hydroxyalkanoate) polymerase subunit PhaE                                         |
| Mv_NIES-102_02336                                    | Y                             | 100%          | 100%                          | 854       | pheA     | Bifunctional chorismate mutase/prephenate dehydratase                                    |
| Mv_NIES-102_00256                                    | Y                             | 100%          | 100%                          | 1523      | phrB     | (6-4) photolyase                                                                         |
| Mv_NIES-102_04080                                    | Y                             | 100%          | 100%                          | 1100      | pilT     | Twitching mobility protein                                                               |
| Mv_NIES-102_02061                                    | Y                             | 100%          | 100%                          | 539       | pipB2_1  | Secreted effector protein PipB2                                                          |
| Mv_NIES-102_04791                                    | Y                             | 100%          | 100%                          | 662       | pipB2_3  | Secreted effector protein PipB2                                                          |
| Mv_NIES-102_00294                                    | Y                             | 100%          | 100%                          | 1445      | pknD_1   | Serine/threonine-protein kinase PknD                                                     |
| Mv_NIES-102_00667                                    | Y                             | 100%          | 100%                          | 2123      | pknD_3   | Serine/threonine-protein kinase PknD                                                     |
| Mv_NIES-102_03868                                    | Y                             | 100%          | 100%                          | 1322      | pknD_5   | Serine/threonine-protein kinase PknD                                                     |
| Mv_NIES-102_01128                                    | Y                             | 100%          | 100%                          | 1013      | pkwA_1   | putative serine/threonine-protein kinase PkwA                                            |
| Mv_NIES-102_01094                                    | Y                             | 100%          | 100%                          | 668       | plsC_1   | 1-acyl-sn-glycerol-3-phosphate acyltransferase                                           |
| Mv_NIES-102_03248                                    | Y                             | 100%          | 100%                          | 710       | plsC_2   | 1-acyl-sn-glycerol-3-phosphate acyltransferase                                           |
| Mv_NIES-102_05494                                    | Y                             | 100%          | 100%                          | 1055      | plsX     | Phosphate acyltransferase                                                                |
| Mv_NIES-102_05049                                    | Y                             | 100%          | 100%                          | 656       | plsY     | Glycerol-3-phosphate acyltransferase                                                     |
| Mv_NIES-102_00136                                    | Y                             | 100%          | 100%                          | 1313      | pmt      | putative dolichyl-phosphate-mannose--protein mannosyltransferase                         |
| Mv_NIES-102_02737                                    | Y                             | 100%          | 100%                          | 2153      | pnp      | Polyribonucleotide nucleotidyltransferase                                                |
| Mv_NIES-102_03566                                    | Y                             | 100%          | 100%                          | 296       | pntA     | NAD(P) transhydrogenase subunit alpha                                                    |
| Mv_NIES-102_03565                                    | Y                             | 100%          | 100%                          | 1148      | pntAA    | NAD(P) transhydrogenase subunit alpha part 1                                             |
| Mv_NIES-102_03567                                    | Y                             | 100%          | 100%                          | 1409      | pntB     | NAD(P) transhydrogenase subunit beta                                                     |
| Mv_NIES-102_02150                                    | Y                             | 100%          | 100%                          | 509       | ppa      | Inorganic pyrophosphatase                                                                |
| Mv_NIES-102_03668                                    | Y                             | 100%          | 100%                          | 695       | ppaX     | Pyrophosphatase PpaX                                                                     |
| Mv_NIES-102_01422                                    | Y                             | 100%          | 100%                          | 3056      | ppc      | Phosphoenolpyruvate carboxylase                                                          |
| Mv_NIES-102_03940                                    | Y                             | 100%          | 100%                          | 2441      | ppsA_1   | Phosphoenolpyruvate synthase                                                             |
| Mv_NIES-102_02738                                    | Y                             | 100%          | 100%                          | 1100      | prfA     | Peptide chain release factor 1                                                           |
| Mv_NIES-102_04586                                    | Y                             | 100%          | 100%                          | 992       | prfB     | Peptide chain release factor 2                                                           |

| Representative gene<br>(Mv_NIES-102 as<br>reference) | Used for core<br>genome tree? | %<br>presence | % intact &<br>single-<br>copy | No.<br>BP | Name    | Product                                                 |
|------------------------------------------------------|-------------------------------|---------------|-------------------------------|-----------|---------|---------------------------------------------------------|
| Mv_NIES-102_03247                                    | Y                             | 100%          | 100%                          | 1634      | prfC    | Peptide chain release factor 3                          |
| Mv_NIES-102_04828                                    | Y                             | 100%          | 100%                          | 2051      | prlC    | Oligopeptidase A                                        |
| Mv_NIES-102_02496                                    | Y                             | 100%          | 100%                          | 896       | prmA    | Ribosomal protein L11 methyltransferase                 |
| Mv_NIES-102_02461                                    | Y                             | 100%          | 100%                          | 1295      | proA_2  | Gamma-glutamyl phosphate reductase                      |
| Mv_NIES-102_05685                                    | Y                             | 100%          | 100%                          | 1139      | proB    | Glutamate 5-kinase                                      |
| Mv_NIES-102_02956                                    | Y                             | 100%          | 100%                          | 875       | proC    | Pyrroline-5-carboxylate reductase                       |
| Mv_NIES-102_01923                                    | Y                             | 100%          | 100%                          | 1811      | proS    | Proline--tRNA ligase                                    |
| Mv_NIES-102_01960                                    | Y                             | 100%          | 100%                          | 722       | prpC    | Protein phosphatase PrpC                                |
| Mv_NIES-102_00069                                    | Y                             | 100%          | 100%                          | 959       | prs     | Ribose-phosphate pyrophosphokinase                      |
| Mv_NIES-102_01148                                    | Y                             | 100%          | 100%                          | 599       | prxU    | Selenocysteine-containing peroxiredoxin PrxU            |
| Mv_NIES-102_00718                                    | Y                             | 100%          | 100%                          | 911       | psaA_1  | Manganese ABC transporter substrate-binding lipoprotein |
| Mv_NIES-102_02198                                    | Y                             | 100%          | 100%                          | 2249      | psaA_2  | Photosystem I P700 chlorophyll a apoprotein A1          |
| Mv_NIES-102_02199                                    | Y                             | 100%          | 100%                          | 2213      | psaB    | Photosystem I P700 chlorophyll a apoprotein A2          |
| Mv_NIES-102_03297                                    | Y                             | 100%          | 100%                          | 245       | psaC    | Photosystem I iron-sulfur center                        |
| Mv_NIES-102_02176                                    | Y                             | 100%          | 100%                          | 494       | psaF    | Photosystem I reaction center subunit III               |
| Mv_NIES-102_02177                                    | Y                             | 100%          | 100%                          | 128       | psaJ    | Photosystem I reaction center subunit IX                |
| Mv_NIES-102_00771                                    | Y                             | 100%          | 100%                          | 266       | psaK1   | Photosystem I reaction center subunit PsaK 1            |
| Mv_NIES-102_01162                                    | Y                             | 100%          | 100%                          | 266       | psaK2   | Photosystem I reaction center subunit PsaK 2            |
| Mv_NIES-102_00230                                    | Y                             | 100%          | 100%                          | 359       | psb28   | Photosystem II reaction center Psb28 protein            |
| Mv_NIES-102_01683                                    | Y                             | 100%          | 100%                          | 1382      | psbC    | Photosystem II CP43 reaction center protein             |
| Mv_NIES-102_00888                                    | Y                             | 100%          | 100%                          | 245       | psbE    | Cytochrome b559 subunit alpha                           |
| Mv_NIES-102_00887                                    | Y                             | 100%          | 100%                          | 134       | psbF    | Cytochrome b559 subunit beta                            |
| Mv_NIES-102_00885                                    | Y                             | 100%          | 100%                          | 119       | psbJ    | Photosystem II reaction center protein J                |
| Mv_NIES-102_04790                                    | Y                             | 100%          | 100%                          | 137       | psbK    | Photosystem II reaction center protein K                |
| Mv_NIES-102_00886                                    | Y                             | 100%          | 100%                          | 119       | psbL    | Photosystem II reaction center protein L                |
| Mv_NIES-102_01930                                    | Y                             | 100%          | 100%                          | 833       | psbO    | Photosystem II manganese-stabilizing polypeptide        |
| Mv_NIES-102_01203                                    | Y                             | 100%          | 100%                          | 407       | psbU    | Photosystem II 12 kDa extrinsic protein                 |
| Mv_NIES-102_04782                                    | Y                             | 100%          | 100%                          | 485       | psbV    | Cytochrome c-550                                        |
| Mv_NIES-102_05386                                    | Y                             | 100%          | 100%                          | 893       | pstA_3  | Phosphate transport system permease protein PstA        |
| Mv_NIES-102_05384                                    | Y                             | 100%          | 100%                          | 797       | pstB    | Phosphate import ATP-binding protein PstB               |
| Mv_NIES-102_05385                                    | Y                             | 100%          | 100%                          | 803       | pstB3_3 | Phosphate import ATP-binding protein PstB 3             |
| Mv_NIES-102_05387                                    | Y                             | 100%          | 100%                          | 959       | pstC_2  | Phosphate transport system permease protein PstC        |
| Mv_NIES-102_05388                                    | Y                             | 100%          | 100%                          | 1121      | pstS_2  | Phosphate-binding protein PstS                          |
| Mv_NIES-102_04332                                    | Y                             | 100%          | 100%                          | 626       | pth     | Peptidyl-tRNA hydrolase                                 |
| Mv_NIES-102_00023                                    | Y                             | 100%          | 100%                          | 1265      | purD    | Phosphoribosylamine--glycine ligase                     |
| Mv_NIES-102_03894                                    | Y                             | 100%          | 100%                          | 1127      | purK    | N5-carboxyaminoimidazole ribonucleotide synthase        |
| Mv_NIES-102_05118                                    | Y                             | 100%          | 100%                          | 2270      | purL    | Phosphoribosylformylglycinamide synthase subunit PurL   |
| Mv_NIES-102_03614                                    | Y                             | 100%          | 100%                          | 638       | purN    | Phosphoribosylglycinamide formyltransferase             |
| Mv_NIES-102_03117                                    | Y                             | 100%          | 100%                          | 716       | purQ    | Phosphoribosylformylglycinamide synthase subunit PurQ   |
| Mv_NIES-102_03116                                    | Y                             | 100%          | 100%                          | 275       | purS    | Phosphoribosylformylglycinamide synthase subunit PurS   |
| Mv_NIES-102_00443                                    | Y                             | 100%          | 100%                          | 1775      | pyk_1   | Pyruvate kinase                                         |
| Mv_NIES-102_02920                                    | Y                             | 100%          | 100%                          | 1421      | pyk_2   | Pyruvate kinase                                         |
| Mv_NIES-102_05009                                    | Y                             | 100%          | 100%                          | 1271      | pyrC_2  | Dihydroorotase                                          |
| Mv_NIES-102_01360                                    | Y                             | 100%          | 100%                          | 1025      | pyrD_1  | Dihydroorotate dehydrogenase                            |
| Mv_NIES-102_05162                                    | Y                             | 100%          | 100%                          | 1148      | pyrD_2  | Dihydroorotate dehydrogenase (quinone)                  |
| Mv_NIES-102_02548                                    | Y                             | 100%          | 100%                          | 647       | pyrE_1  | Orotate phosphoribosyltransferase                       |
| Mv_NIES-102_00662                                    | Y                             | 100%          | 100%                          | 677       | pyrH    | Uridylate kinase                                        |
| Mv_NIES-102_02064                                    | Y                             | 100%          | 100%                          | 533       | pyrR    | Bifunctional protein PyrR                               |
| Mv_NIES-102_03272                                    | Y                             | 100%          | 100%                          | 1097      | queA    | S-adenosylmethionine:tRNA ribosyltransferase-isomerase  |

| Representative gene<br>(Mv_NIES-102 as<br>reference) | Used for core<br>genome tree? | %<br>presence | % intact &<br>single-<br>copy | No.<br>BP | Name    | Product                                                                |
|------------------------------------------------------|-------------------------------|---------------|-------------------------------|-----------|---------|------------------------------------------------------------------------|
| Mv_NIES-102_00267                                    | Y                             | 100%          | 100%                          | 692       | queC    | 7-cyano-7-deazaguanine synthase                                        |
| Mv_NIES-102_00264                                    | Y                             | 100%          | 100%                          | 416       | queE    | 7-carboxy-7-deazaguanine synthase                                      |
| Mv_NIES-102_02481                                    | Y                             | 100%          | 100%                          | 947       | queG    | Epoxyqueuosine reductase                                               |
| Mv_NIES-102_05727                                    | Y                             | 100%          | 100%                          | 1526      | radA    | DNA repair protein RadA                                                |
| Mv_NIES-102_03909                                    | Y                             | 100%          | 100%                          | 3062      | rapA    | RNA polymerase-associated protein RapA                                 |
| Mv_NIES-102_05070                                    | Y                             | 100%          | 100%                          | 839       | rbgA    | Ribosome biogenesis GTPase A                                           |
| Mv_NIES-102_00421                                    | Y                             | 100%          | 100%                          | 998       | RBKS    | Ribokinase                                                             |
| Mv_NIES-102_01884                                    | Y                             | 100%          | 100%                          | 2195      | rcsC_4  | Sensor histidine kinase RcsC                                           |
| Mv_NIES-102_05689                                    | Y                             | 100%          | 100%                          | 2009      | rcsC_7  | Sensor histidine kinase RcsC                                           |
| Mv_NIES-102_05172                                    | Y                             | 100%          | 100%                          | 1067      | recA    | Protein RecA                                                           |
| Mv_NIES-102_03157                                    | Y                             | 100%          | 100%                          | 2468      | recG    | ATP-dependent DNA helicase RecG                                        |
| Mv_NIES-102_00474                                    | Y                             | 100%          | 100%                          | 1727      | recN    | DNA repair protein RecN                                                |
| Mv_NIES-102_00496                                    | Y                             | 100%          | 100%                          | 782       | recO    | DNA repair protein RecO                                                |
| Mv_NIES-102_03751                                    | Y                             | 100%          | 100%                          | 2111      | recQ    | ATP-dependent DNA helicase RecQ                                        |
| Mv_NIES-102_02139                                    | Y                             | 100%          | 100%                          | 566       | recR    | Recombination protein RecR                                             |
| Mv_NIES-102_02716                                    | Y                             | 100%          | 100%                          | 2297      | relA    | GTP pyrophosphokinase                                                  |
| Mv_NIES-102_04784                                    | Y                             | 100%          | 100%                          | 269       | remA    | Extracellular matrix regulatory protein A                              |
| Mv_NIES-102_04314                                    | Y                             | 100%          | 100%                          | 2300      | rep     | ATP-dependent DNA helicase Rep                                         |
| Mv_NIES-102_03687                                    | Y                             | 100%          | 100%                          | 875       | rfbD    | dTDP-4-dehydrorhamnose reductase                                       |
| Mv_NIES-102_04536                                    | Y                             | 100%          | 100%                          | 1019      | rgtE    | Dodecaprenyl-phosphate galacturonate synthase                          |
| Mv_NIES-102_00153                                    | Y                             | 100%          | 100%                          | 1676      | ribBA_1 | Riboflavin biosynthesis protein RibBA                                  |
| Mv_NIES-102_01545                                    | Y                             | 100%          | 100%                          | 1097      | ribD    | Riboflavin biosynthesis protein RibD                                   |
| Mv_NIES-102_02334                                    | Y                             | 100%          | 100%                          | 680       | ribD2   | 2%2C5-diamino-6-ribosylamino-4(3H)-pyrimidinone 5'-phosphate reductase |
| Mv_NIES-102_02460                                    | Y                             | 100%          | 100%                          | 671       | ribE    | Riboflavin synthase                                                    |
| Mv_NIES-102_01221                                    | Y                             | 100%          | 100%                          | 923       | ribF    | Bifunctional riboflavin kinase/FMN adenylyltransferase                 |
| Mv_NIES-102_00790                                    | Y                             | 100%          | 100%                          | 545       | ribH    | 6%2C7-dimethyl-8-ribityllumazine synthase                              |
| Mv_NIES-102_04842                                    | Y                             | 100%          | 100%                          | 905       | rimK    | Ribosomal protein S6--L-glutamate ligase                               |
| Mv_NIES-102_00521                                    | Y                             | 100%          | 100%                          | 1313      | rimO    | Ribosomal protein S12 methylthiotransferase RimO                       |
| Mv_NIES-102_05025                                    | Y                             | 100%          | 100%                          | 470       | rimP    | Ribosome maturation factor RimP                                        |
| Mv_NIES-102_04646                                    | Y                             | 100%          | 100%                          | 1208      | rip3_1  | Putative zinc metalloprotease Rip3                                     |
| Mv_NIES-102_04739                                    | Y                             | 100%          | 100%                          | 1247      | rip3_2  | Putative zinc metalloprotease Rip3                                     |
| Mv_NIES-102_01133                                    | Y                             | 100%          | 100%                          | 1367      | rlmCD   | 23S rRNA (uracil-C(5))-methyltransferase RlmCD                         |
| Mv_NIES-102_04804                                    | Y                             | 100%          | 100%                          | 1184      | rlmI    | Ribosomal RNA large subunit methyltransferase I                        |
| Mv_NIES-102_04580                                    | Y                             | 100%          | 100%                          | 1127      | rlmL    | Ribosomal RNA large subunit methyltransferase K/L                      |
| Mv_NIES-102_01741                                    | Y                             | 100%          | 100%                          | 749       | rlpA    | Endolytic peptidoglycan transglycosylase RlpA                          |
| Mv_NIES-102_01282                                    | Y                             | 100%          | 100%                          | 746       | rluB    | Ribosomal large subunit pseudouridine synthase B                       |
| Mv_NIES-102_02614                                    | Y                             | 100%          | 100%                          | 926       | rluD_1  | Ribosomal large subunit pseudouridine synthase D                       |
| Mv_NIES-102_05303                                    | Y                             | 100%          | 100%                          | 584       | rluE    | Ribosomal large subunit pseudouridine synthase E                       |
| Mv_NIES-102_03686                                    | Y                             | 100%          | 100%                          | 545       | rmlC    | dTDP-4-dehydrorhamnose 3%2C5-epimerase                                 |
| Mv_NIES-102_01610                                    | Y                             | 100%          | 100%                          | 878       | rmlD    | dTDP-4-dehydrorhamnose reductase                                       |
| Mv_NIES-102_00290                                    | Y                             | 100%          | 100%                          | 629       | rnd     | Ribonuclease D                                                         |
| Mv_NIES-102_05101                                    | Y                             | 100%          | 100%                          | 2159      | rne     | Ribonuclease E                                                         |
| Mv_NIES-102_04075                                    | Y                             | 100%          | 100%                          | 362       | rnpA    | Ribonuclease P protein component                                       |
| Mv_NIES-102_00095                                    | Y                             | 100%          | 100%                          | 2252      | mr_1    | Ribonuclease R                                                         |
| Mv_NIES-102_02793                                    | Y                             | 100%          | 100%                          | 956       | rmz     | Ribonuclease Z                                                         |
| Mv_NIES-102_02628                                    | Y                             | 100%          | 100%                          | 2969      | rocA    | 1-pyrroline-5-carboxylate dehydrogenase                                |
| Mv_NIES-102_03927                                    | Y                             | 100%          | 100%                          | 707       | rpiA    | Ribose-5-phosphate isomerase A                                         |
| Mv_NIES-102_01216                                    | Y                             | 100%          | 100%                          | 713       | rplA    | 50S ribosomal protein L1                                               |
| Mv_NIES-102_03104                                    | Y                             | 100%          | 100%                          | 833       | rplB    | 50S ribosomal protein L2                                               |

| Representative gene<br>(Mv_NIES-102 as<br>reference) | Used for core<br>genome tree? | %<br>presence | % intact &<br>single-<br>copy | No.<br>BP | Name    | Product                                            |
|------------------------------------------------------|-------------------------------|---------------|-------------------------------|-----------|---------|----------------------------------------------------|
| Mv_NIES-102_03107                                    | Y                             | 100%          | 100%                          | 638       | rplC    | 50S ribosomal protein L3                           |
| Mv_NIES-102_03106                                    | Y                             | 100%          | 100%                          | 632       | rplD    | 50S ribosomal protein L4                           |
| Mv_NIES-102_03095                                    | Y                             | 100%          | 100%                          | 539       | rplE    | 50S ribosomal protein L5                           |
| Mv_NIES-102_03093                                    | Y                             | 100%          | 100%                          | 569       | rplF    | 50S ribosomal protein L6                           |
| Mv_NIES-102_04377                                    | Y                             | 100%          | 100%                          | 458       | rplI    | 50S ribosomal protein L9                           |
| Mv_NIES-102_01893                                    | Y                             | 100%          | 100%                          | 548       | rplJ    | 50S ribosomal protein L10                          |
| Mv_NIES-102_01215                                    | Y                             | 100%          | 100%                          | 425       | rplK    | 50S ribosomal protein L11                          |
| Mv_NIES-102_01894                                    | Y                             | 100%          | 100%                          | 392       | rplL    | 50S ribosomal protein L7/L12                       |
| Mv_NIES-102_03097                                    | Y                             | 100%          | 100%                          | 368       | rplN    | 50S ribosomal protein L14                          |
| Mv_NIES-102_03090                                    | Y                             | 100%          | 100%                          | 443       | rplO    | 50S ribosomal protein L15                          |
| Mv_NIES-102_03100                                    | Y                             | 100%          | 100%                          | 419       | rplP    | 50S ribosomal protein L16                          |
| Mv_NIES-102_03092                                    | Y                             | 100%          | 100%                          | 362       | rplR    | 50S ribosomal protein L18                          |
| Mv_NIES-102_01211                                    | Y                             | 100%          | 100%                          | 362       | rplS    | 50S ribosomal protein L19                          |
| Mv_NIES-102_01854                                    | Y                             | 100%          | 100%                          | 347       | rplT    | 50S ribosomal protein L20                          |
| Mv_NIES-102_03102                                    | Y                             | 100%          | 100%                          | 359       | rplV    | 50S ribosomal protein L22                          |
| Mv_NIES-102_03105                                    | Y                             | 100%          | 100%                          | 305       | rplW    | 50S ribosomal protein L23                          |
| Mv_NIES-102_03096                                    | Y                             | 100%          | 100%                          | 353       | rplX    | 50S ribosomal protein L24                          |
| Mv_NIES-102_04440                                    | Y                             | 100%          | 100%                          | 269       | rpmA    | 50S ribosomal protein L27                          |
| Mv_NIES-102_00770                                    | Y                             | 100%          | 100%                          | 236       | rpmB    | 50S ribosomal protein L28                          |
| Mv_NIES-102_01855                                    | Y                             | 100%          | 100%                          | 203       | rpmI    | 50S ribosomal protein L35                          |
| Mv_NIES-102_02829                                    | Y                             | 100%          | 100%                          | 3470      | rpoB    | DNA-directed RNA polymerase subunit beta           |
| Mv_NIES-102_04724                                    | Y                             | 100%          | 100%                          | 1880      | rpoC    | DNA-directed RNA polymerase subunit beta'          |
| Mv_NIES-102_04290                                    | Y                             | 100%          | 100%                          | 857       | rpsA_2  | 30S ribosomal protein S1                           |
| Mv_NIES-102_01990                                    | Y                             | 100%          | 100%                          | 797       | rpsB    | 30S ribosomal protein S2                           |
| Mv_NIES-102_03101                                    | Y                             | 100%          | 100%                          | 728       | rpsC    | 30S ribosomal protein S3                           |
| Mv_NIES-102_03091                                    | Y                             | 100%          | 100%                          | 521       | rpsE    | 30S ribosomal protein S5                           |
| Mv_NIES-102_01802                                    | Y                             | 100%          | 100%                          | 470       | rpsG    | 30S ribosomal protein S7                           |
| Mv_NIES-102_03094                                    | Y                             | 100%          | 100%                          | 401       | rpsH    | 30S ribosomal protein S8                           |
| Mv_NIES-102_02736                                    | Y                             | 100%          | 100%                          | 302       | rpsN    | 30S ribosomal protein S14                          |
| Mv_NIES-102_03120                                    | Y                             | 100%          | 100%                          | 248       | rpsP    | 30S ribosomal protein S16                          |
| Mv_NIES-102_03098                                    | Y                             | 100%          | 100%                          | 242       | rpsQ    | 30S ribosomal protein S17                          |
| Mv_NIES-102_03103                                    | Y                             | 100%          | 100%                          | 281       | rpsS    | 30S ribosomal protein S19                          |
| Mv_NIES-102_04220                                    | Y                             | 100%          | 100%                          | 404       | rsfS    | Ribosomal silencing factor RsfS                    |
| Mv_NIES-102_02375                                    | Y                             | 100%          | 100%                          | 1076      | rsgA    | Small ribosomal subunit biogenesis GTPase RsgA     |
| Mv_NIES-102_04132                                    | Y                             | 100%          | 100%                          | 806       | rsmA    | Ribosomal RNA small subunit methyltransferase A    |
| Mv_NIES-102_02631                                    | Y                             | 100%          | 100%                          | 1352      | rsmB    | Ribosomal RNA small subunit methyltransferase B    |
| Mv_NIES-102_05268                                    | Y                             | 100%          | 100%                          | 545       | rsmD    | Ribosomal RNA small subunit methyltransferase D    |
| Mv_NIES-102_02755                                    | Y                             | 100%          | 100%                          | 677       | rsmG    | Ribosomal RNA small subunit methyltransferase G    |
| Mv_NIES-102_00654                                    | Y                             | 100%          | 100%                          | 881       | rsmH    | Ribosomal RNA small subunit methyltransferase H    |
| Mv_NIES-102_02541                                    | Y                             | 100%          | 100%                          | 839       | rsmI    | Ribosomal RNA small subunit methyltransferase I    |
| Mv_NIES-102_03875                                    | Y                             | 100%          | 100%                          | 404       | rsxB    | Ion-translocating oxidoreductase complex subunit B |
| Mv_NIES-102_03774                                    | Y                             | 100%          | 100%                          | 1607      | rsxC    | Ion-translocating oxidoreductase complex subunit C |
| Mv_NIES-102_04645                                    | Y                             | 100%          | 100%                          | 629       | ruvA    | Holliday junction ATP-dependent DNA helicase RuvA  |
| Mv_NIES-102_02695                                    | Y                             | 100%          | 100%                          | 1076      | ruvB    | Holliday junction ATP-dependent DNA helicase RuvB  |
| Mv_NIES-102_04241                                    | Y                             | 100%          | 100%                          | 485       | ruvC    | Crossover junction endodeoxyribonuclease RuvC      |
| Mv_NIES-102_05029                                    | Y                             | 100%          | 100%                          | 1256      | sasA_10 | Adaptive-response sensory-kinase SasA              |
| Mv_NIES-102_01169                                    | Y                             | 100%          | 100%                          | 1997      | sasA_2  | Adaptive-response sensory-kinase SasA              |
| Mv_NIES-102_01746                                    | Y                             | 100%          | 100%                          | 1106      | sasA_3  | Adaptive-response sensory-kinase SasA              |
| Mv_NIES-102_02422                                    | Y                             | 100%          | 100%                          | 1349      | sasA_5  | Adaptive-response sensory-kinase SasA              |



| Representative gene<br>(Mv_NIES-102 as<br>reference) | Used for core<br>genome tree? | %<br>presence | % intact &<br>single-<br>copy | No.<br>BP | Name    | Product                                                                           |
|------------------------------------------------------|-------------------------------|---------------|-------------------------------|-----------|---------|-----------------------------------------------------------------------------------|
| Mv_NIES-102_03446                                    | Y                             | 100%          | 100%                          | 1154      | sasA_6  | Adaptive-response sensory-kinase SasA                                             |
| Mv_NIES-102_03998                                    | Y                             | 100%          | 100%                          | 1442      | sasA_8  | Adaptive-response sensory-kinase SasA                                             |
| Mv_NIES-102_00728                                    | Y                             | 100%          | 100%                          | 1043      | sbpA_1  | Sulfate-binding protein                                                           |
| Mv_NIES-102_04296                                    | Y                             | 100%          | 100%                          | 518       | scpB    | Segregation and condensation protein B                                            |
| Mv_NIES-102_00768                                    | Y                             | 100%          | 100%                          | 2816      | secA    | Protein translocase subunit SecA                                                  |
| Mv_NIES-102_04224                                    | Y                             | 100%          | 100%                          | 1406      | secDF   | Protein translocase subunit SecDF                                                 |
| Mv_NIES-102_01213                                    | Y                             | 100%          | 100%                          | 236       | secE    | Protein translocase subunit SecE                                                  |
| Mv_NIES-102_03089                                    | Y                             | 100%          | 100%                          | 1319      | secY    | Protein translocase subunit SecY                                                  |
| Mv_NIES-102_02957                                    | Y                             | 100%          | 100%                          | 572       | sepF    | Cell division protein SepF                                                        |
| Mv_NIES-102_02497                                    | Y                             | 100%          | 100%                          | 1577      | serA    | D-3-phosphoglycerate dehydrogenase                                                |
| Mv_NIES-102_04912                                    | Y                             | 100%          | 100%                          | 1283      | serS    | Serine--tRNA ligase                                                               |
| Mv_NIES-102_04354                                    | Y                             | 100%          | 100%                          | 662       | sfp     | 4'-phosphopantetheinyl transferase Sfp                                            |
| Mv_NIES-102_05458                                    | Y                             | 100%          | 100%                          | 719       | sfsA    | Sugar fermentation stimulation protein A                                          |
| Mv_NIES-102_01992                                    | Y                             | 100%          | 100%                          | 1955      | shc     | Squalene--hopene cyclase                                                          |
| Mv_NIES-102_02691                                    | Y                             | 100%          | 100%                          | 1133      | sigA2_2 | RNA polymerase sigma factor SigA2                                                 |
| Mv_NIES-102_00073                                    | Y                             | 100%          | 100%                          | 602       | sipT_1  | Signal peptidase I T                                                              |
| Mv_NIES-102_02339                                    | Y                             | 100%          | 100%                          | 575       | sipT_2  | Signal peptidase I T                                                              |
| Mv_NIES-102_05286                                    | Y                             | 100%          | 100%                          | 1937      | sir_2   | Sulfite reductase [ferredoxin]                                                    |
| Mv_NIES-102_05390                                    | Y                             | 100%          | 100%                          | 1541      | sir_3   | Sulfite reductase [ferredoxin]                                                    |
| Mv_NIES-102_03864                                    | Y                             | 100%          | 100%                          | 1487      | smc_5   | Chromosome partition protein Smc                                                  |
| Mv_NIES-102_04448                                    | Y                             | 100%          | 100%                          | 3023      | smc_6   | Chromosome partition protein Smc                                                  |
| Mv_NIES-102_04721                                    | Y                             | 100%          | 100%                          | 3530      | smc_7   | Chromosome partition protein Smc                                                  |
| Mv_NIES-102_01945                                    | Y                             | 100%          | 100%                          | 464       | smpB    | SsrA-binding protein                                                              |
| Mv_NIES-102_02141                                    | Y                             | 100%          | 100%                          | 2039      | speA_1  | Biosynthetic arginine decarboxylase                                               |
| Mv_NIES-102_05033                                    | Y                             | 100%          | 100%                          | 1439      | speA_2  | Arginine decarboxylase                                                            |
| Mv_NIES-102_04445                                    | Y                             | 100%          | 100%                          | 947       | speE    | Polyamine aminopropyltransferase                                                  |
| Mv_NIES-102_01602                                    | Y                             | 100%          | 100%                          | 407       | speH    | S-adenosylmethionine decarboxylase proenzyme                                      |
| Mv_NIES-102_02657                                    | Y                             | 100%          | 100%                          | 752       | sphR    | Alkaline phosphatase synthesis transcriptional regulatory protein SphR            |
| Mv_NIES-102_02658                                    | Y                             | 100%          | 100%                          | 1301      | sphS    | Sensor protein SphS                                                               |
| Mv_NIES-102_03449                                    | Y                             | 100%          | 100%                          | 1700      | spkA    | Serine/threonine-protein kinase A                                                 |
| Mv_NIES-102_02749                                    | Y                             | 100%          | 100%                          | 1586      | spkB    | Serine/threonine-protein kinase B                                                 |
| Mv_NIES-102_03237                                    | Y                             | 100%          | 100%                          | 1814      | sppA    | Protease 4                                                                        |
| Mv_NIES-102_01441                                    | Y                             | 100%          | 100%                          | 350       | ssb     | Single-stranded DNA-binding protein                                               |
| Mv_NIES-102_03278                                    | Y                             | 100%          | 100%                          | 824       | sseA    | 3-mercaptopyruvate sulfurtransferase                                              |
| Mv_NIES-102_00539                                    | Y                             | 100%          | 100%                          | 887       | sucD    | Succinate--CoA ligase [ADP-forming] subunit alpha                                 |
| Mv_NIES-102_00018                                    | Y                             | 100%          | 100%                          | 1442      | sufB    | FeS cluster assembly protein SufB                                                 |
| Mv_NIES-102_00016                                    | Y                             | 100%          | 100%                          | 1325      | sufD    | FeS cluster assembly protein SufD                                                 |
| Mv_NIES-102_01255                                    | Y                             | 100%          | 100%                          | 422       | sufE    | Cysteine desulfuration protein SufE                                               |
| Mv_NIES-102_02834                                    | Y                             | 100%          | 100%                          | 785       | surA_2  | Chaperone SurA                                                                    |
| Mv_NIES-102_00127                                    | Y                             | 100%          | 100%                          | 725       | tagA    | N-acetylglucosaminyldiphosphoundecaprenol N-acetyl-beta-D-mannosaminyltransferase |
| Mv_NIES-102_01420                                    | Y                             | 100%          | 100%                          | 1064      | tagO_1  | putative undecaprenyl-phosphate N-acetylglucosaminyl 1-phosphate transferase      |
| Mv_NIES-102_00042                                    | Y                             | 100%          | 100%                          | 1388      | tagU_1  | Polyisoprenyl-teichoic acid--peptidoglycan teichoic acid transferase TagU         |
| Mv_NIES-102_03976                                    | Y                             | 100%          | 100%                          | 1412      | tagU_2  | Polyisoprenyl-teichoic acid--peptidoglycan teichoic acid transferase TagU         |
| Mv_NIES-102_01856                                    | Y                             | 100%          | 100%                          | 1175      | tal     | Transaldolase                                                                     |
| Mv_NIES-102_05316                                    | Y                             | 100%          | 100%                          | 926       | tam     | Trans-aconitate 2-methyltransferase                                               |
| Mv_NIES-102_04244                                    | Y                             | 100%          | 100%                          | 785       | tcyN    | L-cystine import ATP-binding protein TcyN                                         |
| Mv_NIES-102_04789                                    | Y                             | 100%          | 100%                          | 1124      | tgt     | Queuine tRNA-ribosyltransferase                                                   |
| Mv_NIES-102_01944                                    | Y                             | 100%          | 100%                          | 701       | thfI    | Protein ThfI                                                                      |
| Mv_NIES-102_01858                                    | Y                             | 100%          | 100%                          | 1382      | thiC    | Phosphomethylpyrimidine synthase                                                  |

| Representative gene<br>(Mv_NIES-102 as<br>reference) | Used for core<br>genome tree? | %<br>presence | % intact &<br>single-<br>copy | No.<br>BP | Name   | Product                                                                                       |
|------------------------------------------------------|-------------------------------|---------------|-------------------------------|-----------|--------|-----------------------------------------------------------------------------------------------|
| Mv_NIES-102_01779                                    | Y                             | 100%          | 100%                          | 1016      | thiE   | Thiamine-phosphate synthase                                                                   |
| Mv_NIES-102_05059                                    | Y                             | 100%          | 100%                          | 1976      | thiG   | Thiazole synthase                                                                             |
| Mv_NIES-102_02760                                    | Y                             | 100%          | 100%                          | 968       | thiL   | Thiamine-monophosphate kinase                                                                 |
| Mv_NIES-102_05263                                    | Y                             | 100%          | 100%                          | 917       | thrB_1 | Homoserine kinase                                                                             |
| Mv_NIES-102_00717                                    | Y                             | 100%          | 100%                          | 1799      | thrS_1 | Threonine--tRNA ligase                                                                        |
| Mv_NIES-102_01772                                    | Y                             | 100%          | 100%                          | 1493      | thyA   | Thymidylate synthase                                                                          |
| Mv_NIES-102_04315                                    | Y                             | 100%          | 100%                          | 974       | tilS   | tRNA(Ile)-lysine synthase                                                                     |
| Mv_NIES-102_05077                                    | Y                             | 100%          | 100%                          | 2006      | tkt    | Transketolase                                                                                 |
| Mv_NIES-102_00946                                    | Y                             | 100%          | 100%                          | 1469      | tldD_1 | Metalloprotease TldD                                                                          |
| Mv_NIES-102_02684                                    | Y                             | 100%          | 100%                          | 806       | tlyA   | 16S/23S rRNA (cytidine-2'-O)-methyltransferase TlyA                                           |
| Mv_NIES-102_01773                                    | Y                             | 100%          | 100%                          | 623       | tmk    | Thymidylate kinase                                                                            |
| Mv_NIES-102_03582                                    | Y                             | 100%          | 100%                          | 887       | todF   | 2-hydroxy-6-oxo-2%2C4-heptadienoate hydrolase                                                 |
| Mv_NIES-102_00446                                    | Y                             | 100%          | 100%                          | 536       | tolB_1 | Tol-Pal system protein TolB                                                                   |
| Mv_NIES-102_00447                                    | Y                             | 100%          | 100%                          | 521       | tolB_2 | Tol-Pal system protein TolB                                                                   |
| Mv_NIES-102_02839                                    | Y                             | 100%          | 100%                          | 551       | tolB_3 | Tol-Pal system protein TolB                                                                   |
| Mv_NIES-102_04138                                    | Y                             | 100%          | 100%                          | 512       | tolB_6 | Tol-Pal system protein TolB                                                                   |
| Mv_NIES-102_04741                                    | Y                             | 100%          | 100%                          | 692       | tpiA   | Triosephosphate isomerase                                                                     |
| Mv_NIES-102_00412                                    | Y                             | 100%          | 100%                          | 695       | trmD   | tRNA (guanine-N(1)-)-methyltransferase                                                        |
| Mv_NIES-102_05681                                    | Y                             | 100%          | 100%                          | 1337      | trmFO  | Methylenetetrahydrofolate--tRNA-(uracil-5-)-methyltransferase TrmFO                           |
| Mv_NIES-102_05413                                    | Y                             | 100%          | 100%                          | 800       | trmJ   | tRNA (cytidine/uridine-2'-O-)-methyltransferase TrmJ                                          |
| Mv_NIES-102_05267                                    | Y                             | 100%          | 100%                          | 1304      | trpB_1 | Tryptophan synthase beta chain                                                                |
| Mv_NIES-102_05328                                    | Y                             | 100%          | 100%                          | 1247      | trpB_2 | Tryptophan synthase beta chain                                                                |
| Mv_NIES-102_04567                                    | Y                             | 100%          | 100%                          | 1061      | trpD   | Anthranilate phosphoribosyltransferase                                                        |
| Mv_NIES-102_00036                                    | Y                             | 100%          | 100%                          | 1520      | trpE   | Anthranilate synthase component 1                                                             |
| Mv_NIES-102_01163                                    | Y                             | 100%          | 100%                          | 638       | trpF   | N-(5'-phosphoribosyl)anthranilate isomerase                                                   |
| Mv_NIES-102_00040                                    | Y                             | 100%          | 100%                          | 587       | trpG   | Anthranilate synthase component 2                                                             |
| Mv_NIES-102_00135                                    | Y                             | 100%          | 100%                          | 1010      | trpS   | Tryptophan--tRNA ligase                                                                       |
| Mv_NIES-102_00459                                    | Y                             | 100%          | 100%                          | 881       | truB   | tRNA pseudouridine synthase B                                                                 |
| Mv_NIES-102_00458                                    | Y                             | 100%          | 100%                          | 1034      | tsaD   | tRNA N6-adenosine threonylcarbamoyltransferase                                                |
| Mv_NIES-102_01991                                    | Y                             | 100%          | 100%                          | 755       | tsf    | Elongation factor Ts                                                                          |
| Mv_NIES-102_01800                                    | Y                             | 100%          | 100%                          | 1229      | tuf    | Elongation factor Tu                                                                          |
| Mv_NIES-102_00068                                    | Y                             | 100%          | 100%                          | 1793      | typA   | GTP-binding protein TypA/BipA                                                                 |
| Mv_NIES-102_03785                                    | Y                             | 100%          | 100%                          | 1217      | tyrS   | Tyrosine--tRNA ligase                                                                         |
| Mv_NIES-102_01961                                    | Y                             | 100%          | 100%                          | 1688      | ubiB_1 | protein kinase UbiB                                                                           |
| Mv_NIES-102_02322                                    | Y                             | 100%          | 100%                          | 1991      | ubiB_2 | protein kinase UbiB                                                                           |
| Mv_NIES-102_04835                                    | Y                             | 100%          | 100%                          | 1679      | ubiB_3 | putative protein kinase UbiB                                                                  |
| Mv_NIES-102_05424                                    | Y                             | 100%          | 100%                          | 1718      | ubiB_4 | protein kinase UbiB                                                                           |
| Mv_NIES-102_05470                                    | Y                             | 100%          | 100%                          | 1649      | ubiB_5 | putative protein kinase UbiB                                                                  |
| Mv_NIES-102_04779                                    | Y                             | 100%          | 100%                          | 1505      | ubiD   | 3-octaprenyl-4-hydroxybenzoate carboxy-lyase                                                  |
| Mv_NIES-102_05188                                    | Y                             | 100%          | 100%                          | 803       | udp    | Uridine phosphorylase                                                                         |
| Mv_NIES-102_00225                                    | Y                             | 100%          | 100%                          | 749       | uppS   | Ditrans%2Cpolycis-undecaprenyl-diphosphate synthase ((2E%2C6E)-farnesyl-diphosphate specific) |
| Mv_NIES-102_04130                                    | Y                             | 100%          | 100%                          | 812       | ureD   | Urease accessory protein UreD                                                                 |
| Mv_NIES-102_01687                                    | Y                             | 100%          | 100%                          | 476       | ureE   | Urease accessory protein UreE                                                                 |
| Mv_NIES-102_01706                                    | Y                             | 100%          | 100%                          | 665       | ureF   | Urease accessory protein UreF                                                                 |
| Mv_NIES-102_00128                                    | Y                             | 100%          | 100%                          | 596       | ureG_1 | Urease accessory protein UreG                                                                 |
| Mv_NIES-102_01543                                    | Y                             | 100%          | 100%                          | 1502      | uvrB_1 | UvrABC system protein B                                                                       |
| Mv_NIES-102_03691                                    | Y                             | 100%          | 100%                          | 1877      | uvrC   | UvrABC system protein C                                                                       |
| Mv_NIES-102_03616                                    | Y                             | 100%          | 100%                          | 2720      | valS   | Valine--tRNA ligase                                                                           |
| Mv_NIES-102_00970                                    | Y                             | 100%          | 100%                          | 686       | vte5   | Phytol kinase                                                                                 |

| Representative gene<br>(Mv_NIES-102 as<br>reference) | Used for core<br>genome tree? | %<br>presence | % intact &<br>single-<br>copy | No.<br>BP | Name   | Product                                                                         |
|------------------------------------------------------|-------------------------------|---------------|-------------------------------|-----------|--------|---------------------------------------------------------------------------------|
| Mv_NIES-102_05073                                    | Y                             | 100%          | 100%                          | 740       | walR_1 | Transcriptional regulatory protein WalR                                         |
| Mv_NIES-102_05728                                    | Y                             | 100%          | 100%                          | 728       | walR_2 | Transcriptional regulatory protein WalR                                         |
| Mv_NIES-102_01716                                    | Y                             | 100%          | 100%                          | 857       | wbbL   | N-acetylglucosaminyl-diphospho-decaprenol L-rhamnosyltransferase                |
| Mv_NIES-102_00292                                    | Y                             | 100%          | 100%                          | 995       | wcaJ   | UDP-glucose:undecaprenyl-phosphate glucose-1-phosphate transferase              |
| Mv_NIES-102_01660                                    | Y                             | 100%          | 100%                          | 2198      | xfp    | Xylulose-5-phosphate/fructose-6-phosphate phosphoketolase                       |
| Mv_NIES-102_05304                                    | Y                             | 100%          | 100%                          | 788       | yadH   | Inner membrane transport permease YadH                                          |
| Mv_NIES-102_01643                                    | Y                             | 100%          | 100%                          | 1694      | ybiT   | putative ABC transporter ATP-binding protein YbiT                               |
| Mv_NIES-102_00120                                    | Y                             | 100%          | 100%                          | 791       | ycbX   | putative protein YcbX                                                           |
| Mv_NIES-102_05672                                    | Y                             | 100%          | 100%                          | 1073      | yceM   | Putative oxidoreductase YceM                                                    |
| Mv_NIES-102_03936                                    | Y                             | 100%          | 100%                          | 119       | ycf12  | Photosystem II reaction center protein Ycf12                                    |
| Mv_NIES-102_00132                                    | Y                             | 100%          | 100%                          | 782       | ycf3_1 | Photosystem I assembly protein Ycf3                                             |
| Mv_NIES-102_00504                                    | Y                             | 100%          | 100%                          | 866       | ycf3_5 | Photosystem I assembly protein Ycf3                                             |
| Mv_NIES-102_00719                                    | Y                             | 100%          | 100%                          | 1103      | yciC_2 | Putative metal chaperone YciC                                                   |
| Mv_NIES-102_00255                                    | Y                             | 100%          | 100%                          | 341       | yciH   | putative protein YciH                                                           |
| Mv_NIES-102_04754                                    | Y                             | 100%          | 100%                          | 641       | yciO   | putative protein YciO                                                           |
| Mv_NIES-102_05489                                    | Y                             | 100%          | 100%                          | 650       | ydjZ   | TVP38/TMEM64 family inner membrane protein YdjZ                                 |
| Mv_NIES-102_01067                                    | Y                             | 100%          | 100%                          | 1013      | ygfZ   | tRNA-modifying protein YgfZ                                                     |
| Mv_NIES-102_05105                                    | Y                             | 100%          | 100%                          | 953       | yhdJ_2 | DNA adenine methyltransferase YhdJ                                              |
| Mv_NIES-102_01657                                    | Y                             | 100%          | 100%                          | 959       | yhdN   | Aldo-keto reductase YhdN                                                        |
| Mv_NIES-102_01338                                    | Y                             | 100%          | 100%                          | 995       | yhdY   | Inner membrane amino-acid ABC transporter permease protein YhdY                 |
| Mv_NIES-102_04949                                    | Y                             | 100%          | 100%                          | 1742      | yhel   | putative multidrug resistance ABC transporter ATP-binding/permease protein Yhel |
| Mv_NIES-102_00066                                    | Y                             | 100%          | 100%                          | 659       | yhfK   | putative sugar epimerase YhfK                                                   |
| Mv_NIES-102_01324                                    | Y                             | 100%          | 100%                          | 1043      | yhhT_2 | Putative transport protein YhhT                                                 |
| Mv_NIES-102_04061                                    | Y                             | 100%          | 100%                          | 1037      | yhhT_3 | Putative transport protein YhhT                                                 |
| Mv_NIES-102_04073                                    | Y                             | 100%          | 100%                          | 1148      | yidC   | Membrane protein insertase YidC                                                 |
| Mv_NIES-102_04320                                    | Y                             | 100%          | 100%                          | 890       | ykfA_1 | putative murein peptide carboxypeptidase                                        |
| Mv_NIES-102_05398                                    | Y                             | 100%          | 100%                          | 1043      | ykfA_2 | putative murein peptide carboxypeptidase                                        |
| Mv_NIES-102_00713                                    | Y                             | 100%          | 100%                          | 830       | ykoC   | Putative HMP/thiamine permease protein YkoC                                     |
| Mv_NIES-102_05116                                    | Y                             | 100%          | 100%                          | 1715      | ykoD   | Putative HMP/thiamine import ATP-binding protein YkoD                           |
| Mv_NIES-102_00626                                    | Y                             | 100%          | 100%                          | 551       | yrdA   | Protein YrdA                                                                    |
| Mv_NIES-102_02469                                    | Y                             | 100%          | 100%                          | 479       | yrrK   | Putative pre-16S rRNA nuclease                                                  |
| Mv_NIES-102_01872                                    | Y                             | 100%          | 100%                          | 491       | ywnH   | Putative phosphinothricin acetyltransferase YwnH                                |
| Mv_NIES-102_05609                                    | Y                             | 100%          | 100%                          | 947       | znuA   | High-affinity zinc uptake system binding-protein ZnuA                           |
| Mv_NIES-102_02682                                    | Y                             | 100%          | 100%                          | 830       | znuB   | High-affinity zinc uptake system membrane protein ZnuB                          |
| Mv_NIES-102_05608                                    | Y                             | 100%          | 100%                          | 743       | znuC   | High-affinity zinc uptake system ATP-binding protein ZnuC                       |
| Mv_NIES-102_03115                                    | Y                             | 100%          | 100%                          | 383       | zur    | Zinc uptake regulation protein                                                  |
| Mv_NIES-102_01877                                    | Y                             | 100%          | 100%                          | 1529      | zwf2   | Glucose-6-phosphate 1-dehydrogenase 2                                           |
| Mv_NIES-102_03447                                    | Y                             | 100%          | 100%                          | 1589      |        | 1%2C4-alpha-glucan branching enzyme                                             |
| Mv_NIES-102_03232                                    | Y                             | 100%          | 100%                          | 944       |        | 2-haloacrylate reductase                                                        |
| Mv_NIES-102_00787                                    | Y                             | 100%          | 100%                          | 2696      |        | A-adding tRNA nucleotidyltransferase                                            |
| Mv_NIES-102_05287                                    | Y                             | 100%          | 100%                          | 2399      |        | ABC transporter ATP-binding/permease protein                                    |
| Mv_NIES-102_02711                                    | Y                             | 100%          | 100%                          | 695       |        | Aldehyde decarboxylase                                                          |
| Mv_NIES-102_03230                                    | Y                             | 100%          | 100%                          | 1427      |        | Beta-monoglucosyldiacylglycerol synthase                                        |
| Mv_NIES-102_02756                                    | Y                             | 100%          | 100%                          | 1088      |        | Ca(2+)/H(+) antiporter                                                          |
| Mv_NIES-102_05280                                    | Y                             | 100%          | 100%                          | 1085      |        | Ca(2+)/H(+) antiporter                                                          |
| Mv_NIES-102_00101                                    | Y                             | 100%          | 100%                          | 1640      |        | Cardiolipin synthase                                                            |
| Mv_NIES-102_01673                                    | Y                             | 100%          | 100%                          | 662       |        | Catechol O-methyltransferase                                                    |
| Mv_NIES-102_02536                                    | Y                             | 100%          | 100%                          | 1217      |        | CC-adding tRNA nucleotidyltransferase                                           |
| Mv_NIES-102_00229                                    | Y                             | 100%          | 100%                          | 947       |        | Epimerase family protein                                                        |

| Representative gene<br>(Mv_NIES-102 as<br>reference) | Used for core<br>genome tree? | %<br>presence | % intact &<br>single-<br>copy | No.<br>BP | Name | Product                         |
|------------------------------------------------------|-------------------------------|---------------|-------------------------------|-----------|------|---------------------------------|
| Mv_NIES-102_00103                                    | Y                             | 100%          | 100%                          | 860       |      | Formylglycine-generating enzyme |
| Mv_NIES-102_03776                                    | Y                             | 100%          | 100%                          | 1373      |      | Gluconeogenesis factor          |
| Mv_NIES-102_03291                                    | Y                             | 100%          | 100%                          | 1190      |      | Glycogen synthase               |
| Mv_NIES-102_01675                                    | Y                             | 100%          | 100%                          | 941       |      | Homogentisate phytyltransferase |
| Mv_NIES-102_00014                                    | Y                             | 100%          | 100%                          | 1505      |      | hypothetical protein            |
| Mv_NIES-102_00019                                    | Y                             | 100%          | 100%                          | 638       |      | hypothetical protein            |
| Mv_NIES-102_00021                                    | Y                             | 100%          | 100%                          | 1556      |      | hypothetical protein            |
| Mv_NIES-102_00028                                    | Y                             | 100%          | 100%                          | 587       |      | hypothetical protein            |
| Mv_NIES-102_00029                                    | Y                             | 100%          | 100%                          | 1463      |      | hypothetical protein            |
| Mv_NIES-102_00038                                    | Y                             | 100%          | 100%                          | 1637      |      | hypothetical protein            |
| Mv_NIES-102_00039                                    | Y                             | 100%          | 100%                          | 809       |      | hypothetical protein            |
| Mv_NIES-102_00043                                    | Y                             | 100%          | 100%                          | 677       |      | hypothetical protein            |
| Mv_NIES-102_00067                                    | Y                             | 100%          | 100%                          | 704       |      | hypothetical protein            |
| Mv_NIES-102_00094                                    | Y                             | 100%          | 100%                          | 782       |      | hypothetical protein            |
| Mv_NIES-102_00096                                    | Y                             | 100%          | 100%                          | 821       |      | hypothetical protein            |
| Mv_NIES-102_00106                                    | Y                             | 100%          | 100%                          | 896       |      | hypothetical protein            |
| Mv_NIES-102_00109                                    | Y                             | 100%          | 100%                          | 827       |      | hypothetical protein            |
| Mv_NIES-102_00111                                    | Y                             | 100%          | 100%                          | 254       |      | hypothetical protein            |
| Mv_NIES-102_00125                                    | Y                             | 100%          | 100%                          | 1601      |      | hypothetical protein            |
| Mv_NIES-102_00126                                    | Y                             | 100%          | 100%                          | 1415      |      | hypothetical protein            |
| Mv_NIES-102_00131                                    | Y                             | 100%          | 100%                          | 548       |      | hypothetical protein            |
| Mv_NIES-102_00133                                    | Y                             | 100%          | 100%                          | 179       |      | hypothetical protein            |
| Mv_NIES-102_00137                                    | Y                             | 100%          | 100%                          | 629       |      | hypothetical protein            |
| Mv_NIES-102_00138                                    | Y                             | 100%          | 100%                          | 2048      |      | hypothetical protein            |
| Mv_NIES-102_00139                                    | Y                             | 100%          | 100%                          | 779       |      | hypothetical protein            |
| Mv_NIES-102_00140                                    | Y                             | 100%          | 100%                          | 509       |      | hypothetical protein            |
| Mv_NIES-102_00181                                    | Y                             | 100%          | 100%                          | 1826      |      | hypothetical protein            |
| Mv_NIES-102_00205                                    | Y                             | 100%          | 100%                          | 362       |      | hypothetical protein            |
| Mv_NIES-102_00213                                    | Y                             | 100%          | 100%                          | 200       |      | hypothetical protein            |
| Mv_NIES-102_00214                                    | Y                             | 100%          | 100%                          | 356       |      | hypothetical protein            |
| Mv_NIES-102_00215                                    | Y                             | 100%          | 100%                          | 3326      |      | hypothetical protein            |
| Mv_NIES-102_00217                                    | Y                             | 100%          | 100%                          | 983       |      | hypothetical protein            |
| Mv_NIES-102_00254                                    | Y                             | 100%          | 100%                          | 467       |      | hypothetical protein            |
| Mv_NIES-102_00263                                    | Y                             | 100%          | 100%                          | 557       |      | hypothetical protein            |
| Mv_NIES-102_00269                                    | Y                             | 100%          | 100%                          | 953       |      | hypothetical protein            |
| Mv_NIES-102_00286                                    | Y                             | 100%          | 100%                          | 386       |      | hypothetical protein            |
| Mv_NIES-102_00287                                    | Y                             | 100%          | 100%                          | 665       |      | hypothetical protein            |
| Mv_NIES-102_00293                                    | Y                             | 100%          | 100%                          | 452       |      | hypothetical protein            |
| Mv_NIES-102_00299                                    | Y                             | 100%          | 100%                          | 1139      |      | hypothetical protein            |
| Mv_NIES-102_00326                                    | Y                             | 100%          | 100%                          | 185       |      | hypothetical protein            |
| Mv_NIES-102_00327                                    | Y                             | 100%          | 100%                          | 1292      |      | hypothetical protein            |
| Mv_NIES-102_00338                                    | Y                             | 100%          | 100%                          | 1511      |      | hypothetical protein            |
| Mv_NIES-102_00345                                    | Y                             | 100%          | 100%                          | 395       |      | hypothetical protein            |
| Mv_NIES-102_00347                                    | Y                             | 100%          | 100%                          | 434       |      | hypothetical protein            |
| Mv_NIES-102_00349                                    | Y                             | 100%          | 100%                          | 656       |      | hypothetical protein            |
| Mv_NIES-102_00358                                    | Y                             | 100%          | 100%                          | 1175      |      | hypothetical protein            |
| Mv_NIES-102_00359                                    | Y                             | 100%          | 100%                          | 527       |      | hypothetical protein            |
| Mv_NIES-102_00363                                    | Y                             | 100%          | 100%                          | 410       |      | hypothetical protein            |
| Mv_NIES-102_00364                                    | Y                             | 100%          | 100%                          | 257       |      | hypothetical protein            |

| Representative gene<br>(Mv_NIES-102 as<br>reference) | Used for core<br>genome tree? | %<br>presence | % intact &<br>single-<br>copy | No.<br>BP | Name | Product              |
|------------------------------------------------------|-------------------------------|---------------|-------------------------------|-----------|------|----------------------|
| Mv_NIES-102_00422                                    | Y                             | 100%          | 100%                          | 212       |      | hypothetical protein |
| Mv_NIES-102_00427                                    | Y                             | 100%          | 100%                          | 281       |      | hypothetical protein |
| Mv_NIES-102_00428                                    | Y                             | 100%          | 100%                          | 479       |      | hypothetical protein |
| Mv_NIES-102_00430                                    | Y                             | 100%          | 100%                          | 773       |      | hypothetical protein |
| Mv_NIES-102_00445                                    | Y                             | 100%          | 100%                          | 815       |      | hypothetical protein |
| Mv_NIES-102_00448                                    | Y                             | 100%          | 100%                          | 1097      |      | hypothetical protein |
| Mv_NIES-102_00450                                    | Y                             | 100%          | 100%                          | 1364      |      | hypothetical protein |
| Mv_NIES-102_00452                                    | Y                             | 100%          | 100%                          | 812       |      | hypothetical protein |
| Mv_NIES-102_00454                                    | Y                             | 100%          | 100%                          | 581       |      | hypothetical protein |
| Mv_NIES-102_00467                                    | Y                             | 100%          | 100%                          | 1646      |      | hypothetical protein |
| Mv_NIES-102_00472                                    | Y                             | 100%          | 100%                          | 1058      |      | hypothetical protein |
| Mv_NIES-102_00480                                    | Y                             | 100%          | 100%                          | 1529      |      | hypothetical protein |
| Mv_NIES-102_00489                                    | Y                             | 100%          | 100%                          | 779       |      | hypothetical protein |
| Mv_NIES-102_00490                                    | Y                             | 100%          | 100%                          | 527       |      | hypothetical protein |
| Mv_NIES-102_00493                                    | Y                             | 100%          | 100%                          | 1547      |      | hypothetical protein |
| Mv_NIES-102_00494                                    | Y                             | 100%          | 100%                          | 812       |      | hypothetical protein |
| Mv_NIES-102_00497                                    | Y                             | 100%          | 100%                          | 1490      |      | hypothetical protein |
| Mv_NIES-102_00505                                    | Y                             | 100%          | 100%                          | 434       |      | hypothetical protein |
| Mv_NIES-102_00507                                    | Y                             | 100%          | 100%                          | 1613      |      | hypothetical protein |
| Mv_NIES-102_00520                                    | Y                             | 100%          | 100%                          | 893       |      | hypothetical protein |
| Mv_NIES-102_00614                                    | Y                             | 100%          | 100%                          | 341       |      | hypothetical protein |
| Mv_NIES-102_00616                                    | Y                             | 100%          | 100%                          | 1055      |      | hypothetical protein |
| Mv_NIES-102_00624                                    | Y                             | 100%          | 100%                          | 497       |      | hypothetical protein |
| Mv_NIES-102_00625                                    | Y                             | 100%          | 100%                          | 566       |      | hypothetical protein |
| Mv_NIES-102_00628                                    | Y                             | 100%          | 100%                          | 1334      |      | hypothetical protein |
| Mv_NIES-102_00639                                    | Y                             | 100%          | 100%                          | 461       |      | hypothetical protein |
| Mv_NIES-102_00663                                    | Y                             | 100%          | 100%                          | 581       |      | hypothetical protein |
| Mv_NIES-102_00668                                    | Y                             | 100%          | 100%                          | 668       |      | hypothetical protein |
| Mv_NIES-102_00705                                    | Y                             | 100%          | 100%                          | 1202      |      | hypothetical protein |
| Mv_NIES-102_00720                                    | Y                             | 100%          | 100%                          | 437       |      | hypothetical protein |
| Mv_NIES-102_00721                                    | Y                             | 100%          | 100%                          | 2636      |      | hypothetical protein |
| Mv_NIES-102_00727                                    | Y                             | 100%          | 100%                          | 341       |      | hypothetical protein |
| Mv_NIES-102_00729                                    | Y                             | 100%          | 100%                          | 779       |      | hypothetical protein |
| Mv_NIES-102_00731                                    | Y                             | 100%          | 100%                          | 554       |      | hypothetical protein |
| Mv_NIES-102_00749                                    | Y                             | 100%          | 100%                          | 995       |      | hypothetical protein |
| Mv_NIES-102_00750                                    | Y                             | 100%          | 100%                          | 1097      |      | hypothetical protein |
| Mv_NIES-102_00755                                    | Y                             | 100%          | 100%                          | 170       |      | hypothetical protein |
| Mv_NIES-102_00756                                    | Y                             | 100%          | 100%                          | 1946      |      | hypothetical protein |
| Mv_NIES-102_00757                                    | Y                             | 100%          | 100%                          | 407       |      | hypothetical protein |
| Mv_NIES-102_00758                                    | Y                             | 100%          | 100%                          | 251       |      | hypothetical protein |
| Mv_NIES-102_00759                                    | Y                             | 100%          | 100%                          | 758       |      | hypothetical protein |
| Mv_NIES-102_00760                                    | Y                             | 100%          | 100%                          | 392       |      | hypothetical protein |
| Mv_NIES-102_00767                                    | Y                             | 100%          | 100%                          | 170       |      | hypothetical protein |
| Mv_NIES-102_00774                                    | Y                             | 100%          | 100%                          | 1175      |      | hypothetical protein |
| Mv_NIES-102_00775                                    | Y                             | 100%          | 100%                          | 1265      |      | hypothetical protein |
| Mv_NIES-102_00785                                    | Y                             | 100%          | 100%                          | 296       |      | hypothetical protein |
| Mv_NIES-102_00786                                    | Y                             | 100%          | 100%                          | 164       |      | hypothetical protein |
| Mv_NIES-102_00795                                    | Y                             | 100%          | 100%                          | 407       |      | hypothetical protein |
| Mv_NIES-102_00804                                    | Y                             | 100%          | 100%                          | 977       |      | hypothetical protein |

| Representative gene<br>(Mv_NIES-102 as<br>reference) | Used for core<br>genome tree? | %<br>presence | % intact &<br>single-<br>copy | No.<br>BP | Name | Product              |
|------------------------------------------------------|-------------------------------|---------------|-------------------------------|-----------|------|----------------------|
| Mv_NIES-102_00810                                    | Y                             | 100%          | 100%                          | 1127      |      | hypothetical protein |
| Mv_NIES-102_00813                                    | Y                             | 100%          | 100%                          | 1304      |      | hypothetical protein |
| Mv_NIES-102_00890                                    | Y                             | 100%          | 100%                          | 347       |      | hypothetical protein |
| Mv_NIES-102_00921                                    | Y                             | 100%          | 100%                          | 1211      |      | hypothetical protein |
| Mv_NIES-102_00923                                    | Y                             | 100%          | 100%                          | 530       |      | hypothetical protein |
| Mv_NIES-102_00928                                    | Y                             | 100%          | 100%                          | 224       |      | hypothetical protein |
| Mv_NIES-102_00929                                    | Y                             | 100%          | 100%                          | 809       |      | hypothetical protein |
| Mv_NIES-102_00933                                    | Y                             | 100%          | 100%                          | 1001      |      | hypothetical protein |
| Mv_NIES-102_00934                                    | Y                             | 100%          | 100%                          | 866       |      | hypothetical protein |
| Mv_NIES-102_00945                                    | Y                             | 100%          | 100%                          | 590       |      | hypothetical protein |
| Mv_NIES-102_00955                                    | Y                             | 100%          | 100%                          | 419       |      | hypothetical protein |
| Mv_NIES-102_00956                                    | Y                             | 100%          | 100%                          | 737       |      | hypothetical protein |
| Mv_NIES-102_00957                                    | Y                             | 100%          | 100%                          | 767       |      | hypothetical protein |
| Mv_NIES-102_00967                                    | Y                             | 100%          | 100%                          | 602       |      | hypothetical protein |
| Mv_NIES-102_00972                                    | Y                             | 100%          | 100%                          | 758       |      | hypothetical protein |
| Mv_NIES-102_01066                                    | Y                             | 100%          | 100%                          | 368       |      | hypothetical protein |
| Mv_NIES-102_01069                                    | Y                             | 100%          | 100%                          | 728       |      | hypothetical protein |
| Mv_NIES-102_01084                                    | Y                             | 100%          | 100%                          | 761       |      | hypothetical protein |
| Mv_NIES-102_01089                                    | Y                             | 100%          | 100%                          | 389       |      | hypothetical protein |
| Mv_NIES-102_01091                                    | Y                             | 100%          | 100%                          | 473       |      | hypothetical protein |
| Mv_NIES-102_01093                                    | Y                             | 100%          | 100%                          | 365       |      | hypothetical protein |
| Mv_NIES-102_01119                                    | Y                             | 100%          | 100%                          | 632       |      | hypothetical protein |
| Mv_NIES-102_01122                                    | Y                             | 100%          | 100%                          | 1391      |      | hypothetical protein |
| Mv_NIES-102_01131                                    | Y                             | 100%          | 100%                          | 1694      |      | hypothetical protein |
| Mv_NIES-102_01135                                    | Y                             | 100%          | 100%                          | 281       |      | hypothetical protein |
| Mv_NIES-102_01136                                    | Y                             | 100%          | 100%                          | 401       |      | hypothetical protein |
| Mv_NIES-102_01137                                    | Y                             | 100%          | 100%                          | 638       |      | hypothetical protein |
| Mv_NIES-102_01140                                    | Y                             | 100%          | 100%                          | 356       |      | hypothetical protein |
| Mv_NIES-102_01141                                    | Y                             | 100%          | 100%                          | 1130      |      | hypothetical protein |
| Mv_NIES-102_01142                                    | Y                             | 100%          | 100%                          | 563       |      | hypothetical protein |
| Mv_NIES-102_01166                                    | Y                             | 100%          | 100%                          | 905       |      | hypothetical protein |
| Mv_NIES-102_01167                                    | Y                             | 100%          | 100%                          | 407       |      | hypothetical protein |
| Mv_NIES-102_01170                                    | Y                             | 100%          | 100%                          | 347       |      | hypothetical protein |
| Mv_NIES-102_01171                                    | Y                             | 100%          | 100%                          | 179       |      | hypothetical protein |
| Mv_NIES-102_01178                                    | Y                             | 100%          | 100%                          | 449       |      | hypothetical protein |
| Mv_NIES-102_01187                                    | Y                             | 100%          | 100%                          | 374       |      | hypothetical protein |
| Mv_NIES-102_01201                                    | Y                             | 100%          | 100%                          | 1094      |      | hypothetical protein |
| Mv_NIES-102_01228                                    | Y                             | 100%          | 100%                          | 1418      |      | hypothetical protein |
| Mv_NIES-102_01231                                    | Y                             | 100%          | 100%                          | 398       |      | hypothetical protein |
| Mv_NIES-102_01235                                    | Y                             | 100%          | 100%                          | 1514      |      | hypothetical protein |
| Mv_NIES-102_01240                                    | Y                             | 100%          | 100%                          | 1283      |      | hypothetical protein |
| Mv_NIES-102_01246                                    | Y                             | 100%          | 100%                          | 2189      |      | hypothetical protein |
| Mv_NIES-102_01247                                    | Y                             | 100%          | 100%                          | 2237      |      | hypothetical protein |
| Mv_NIES-102_01256                                    | Y                             | 100%          | 100%                          | 551       |      | hypothetical protein |
| Mv_NIES-102_01262                                    | Y                             | 100%          | 100%                          | 905       |      | hypothetical protein |
| Mv_NIES-102_01263                                    | Y                             | 100%          | 100%                          | 746       |      | hypothetical protein |
| Mv_NIES-102_01264                                    | Y                             | 100%          | 100%                          | 1214      |      | hypothetical protein |
| Mv_NIES-102_01265                                    | Y                             | 100%          | 100%                          | 2222      |      | hypothetical protein |
| Mv_NIES-102_01271                                    | Y                             | 100%          | 100%                          | 782       |      | hypothetical protein |

| Representative gene<br>(Mv_NIES-102 as<br>reference) | Used for core<br>genome tree? | %<br>presence | % intact &<br>single-<br>copy | No.<br>BP | Name | Product              |
|------------------------------------------------------|-------------------------------|---------------|-------------------------------|-----------|------|----------------------|
| Mv_NIES-102_01280                                    | Y                             | 100%          | 100%                          | 848       |      | hypothetical protein |
| Mv_NIES-102_01281                                    | Y                             | 100%          | 100%                          | 761       |      | hypothetical protein |
| Mv_NIES-102_01314                                    | Y                             | 100%          | 100%                          | 260       |      | hypothetical protein |
| Mv_NIES-102_01315                                    | Y                             | 100%          | 100%                          | 332       |      | hypothetical protein |
| Mv_NIES-102_01322                                    | Y                             | 100%          | 100%                          | 377       |      | hypothetical protein |
| Mv_NIES-102_01329                                    | Y                             | 100%          | 100%                          | 1151      |      | hypothetical protein |
| Mv_NIES-102_01330                                    | Y                             | 100%          | 100%                          | 704       |      | hypothetical protein |
| Mv_NIES-102_01331                                    | Y                             | 100%          | 100%                          | 806       |      | hypothetical protein |
| Mv_NIES-102_01349                                    | Y                             | 100%          | 100%                          | 539       |      | hypothetical protein |
| Mv_NIES-102_01357                                    | Y                             | 100%          | 100%                          | 266       |      | hypothetical protein |
| Mv_NIES-102_01384                                    | Y                             | 100%          | 100%                          | 434       |      | hypothetical protein |
| Mv_NIES-102_01392                                    | Y                             | 100%          | 100%                          | 2051      |      | hypothetical protein |
| Mv_NIES-102_01406                                    | Y                             | 100%          | 100%                          | 380       |      | hypothetical protein |
| Mv_NIES-102_01435                                    | Y                             | 100%          | 100%                          | 1319      |      | hypothetical protein |
| Mv_NIES-102_01443                                    | Y                             | 100%          | 100%                          | 749       |      | hypothetical protein |
| Mv_NIES-102_01444                                    | Y                             | 100%          | 100%                          | 536       |      | hypothetical protein |
| Mv_NIES-102_01523                                    | Y                             | 100%          | 100%                          | 380       |      | hypothetical protein |
| Mv_NIES-102_01524                                    | Y                             | 100%          | 100%                          | 365       |      | hypothetical protein |
| Mv_NIES-102_01572                                    | Y                             | 100%          | 100%                          | 191       |      | hypothetical protein |
| Mv_NIES-102_01599                                    | Y                             | 100%          | 100%                          | 650       |      | hypothetical protein |
| Mv_NIES-102_01600                                    | Y                             | 100%          | 100%                          | 512       |      | hypothetical protein |
| Mv_NIES-102_01601                                    | Y                             | 100%          | 100%                          | 209       |      | hypothetical protein |
| Mv_NIES-102_01605                                    | Y                             | 100%          | 100%                          | 653       |      | hypothetical protein |
| Mv_NIES-102_01606                                    | Y                             | 100%          | 100%                          | 626       |      | hypothetical protein |
| Mv_NIES-102_01612                                    | Y                             | 100%          | 100%                          | 494       |      | hypothetical protein |
| Mv_NIES-102_01614                                    | Y                             | 100%          | 100%                          | 602       |      | hypothetical protein |
| Mv_NIES-102_01656                                    | Y                             | 100%          | 100%                          | 575       |      | hypothetical protein |
| Mv_NIES-102_01659                                    | Y                             | 100%          | 100%                          | 1499      |      | hypothetical protein |
| Mv_NIES-102_01661                                    | Y                             | 100%          | 100%                          | 935       |      | hypothetical protein |
| Mv_NIES-102_01662                                    | Y                             | 100%          | 100%                          | 1127      |      | hypothetical protein |
| Mv_NIES-102_01663                                    | Y                             | 100%          | 100%                          | 1226      |      | hypothetical protein |
| Mv_NIES-102_01664                                    | Y                             | 100%          | 100%                          | 2879      |      | hypothetical protein |
| Mv_NIES-102_01686                                    | Y                             | 100%          | 100%                          | 518       |      | hypothetical protein |
| Mv_NIES-102_01707                                    | Y                             | 100%          | 100%                          | 950       |      | hypothetical protein |
| Mv_NIES-102_01709                                    | Y                             | 100%          | 100%                          | 1751      |      | hypothetical protein |
| Mv_NIES-102_01727                                    | Y                             | 100%          | 100%                          | 965       |      | hypothetical protein |
| Mv_NIES-102_01731                                    | Y                             | 100%          | 100%                          | 1445      |      | hypothetical protein |
| Mv_NIES-102_01733                                    | Y                             | 100%          | 100%                          | 707       |      | hypothetical protein |
| Mv_NIES-102_01744                                    | Y                             | 100%          | 100%                          | 194       |      | hypothetical protein |
| Mv_NIES-102_01745                                    | Y                             | 100%          | 100%                          | 416       |      | hypothetical protein |
| Mv_NIES-102_01749                                    | Y                             | 100%          | 100%                          | 224       |      | hypothetical protein |
| Mv_NIES-102_01750                                    | Y                             | 100%          | 100%                          | 590       |      | hypothetical protein |
| Mv_NIES-102_01751                                    | Y                             | 100%          | 100%                          | 284       |      | hypothetical protein |
| Mv_NIES-102_01754                                    | Y                             | 100%          | 100%                          | 434       |      | hypothetical protein |
| Mv_NIES-102_01756                                    | Y                             | 100%          | 100%                          | 128       |      | hypothetical protein |
| Mv_NIES-102_01769                                    | Y                             | 100%          | 100%                          | 818       |      | hypothetical protein |
| Mv_NIES-102_01780                                    | Y                             | 100%          | 100%                          | 209       |      | hypothetical protein |
| Mv_NIES-102_01796                                    | Y                             | 100%          | 100%                          | 923       |      | hypothetical protein |
| Mv_NIES-102_01806                                    | Y                             | 100%          | 100%                          | 1196      |      | hypothetical protein |



| Representative gene<br>(Mv_NIES-102 as<br>reference) | Used for core<br>genome tree? | %<br>presence | % intact &<br>single-<br>copy | No.<br>BP | Name | Product              |
|------------------------------------------------------|-------------------------------|---------------|-------------------------------|-----------|------|----------------------|
| Mv_NIES-102_01807                                    | Y                             | 100%          | 100%                          | 605       |      | hypothetical protein |
| Mv_NIES-102_01809                                    | Y                             | 100%          | 100%                          | 716       |      | hypothetical protein |
| Mv_NIES-102_01871                                    | Y                             | 100%          | 100%                          | 2972      |      | hypothetical protein |
| Mv_NIES-102_01873                                    | Y                             | 100%          | 100%                          | 6137      |      | hypothetical protein |
| Mv_NIES-102_01874                                    | Y                             | 100%          | 100%                          | 1190      |      | hypothetical protein |
| Mv_NIES-102_01878                                    | Y                             | 100%          | 100%                          | 1355      |      | hypothetical protein |
| Mv_NIES-102_01879                                    | Y                             | 100%          | 100%                          | 584       |      | hypothetical protein |
| Mv_NIES-102_01899                                    | Y                             | 100%          | 100%                          | 701       |      | hypothetical protein |
| Mv_NIES-102_01900                                    | Y                             | 100%          | 100%                          | 668       |      | hypothetical protein |
| Mv_NIES-102_01903                                    | Y                             | 100%          | 100%                          | 1682      |      | hypothetical protein |
| Mv_NIES-102_01934                                    | Y                             | 100%          | 100%                          | 1286      |      | hypothetical protein |
| Mv_NIES-102_01946                                    | Y                             | 100%          | 100%                          | 548       |      | hypothetical protein |
| Mv_NIES-102_01948                                    | Y                             | 100%          | 100%                          | 2306      |      | hypothetical protein |
| Mv_NIES-102_01962                                    | Y                             | 100%          | 100%                          | 305       |      | hypothetical protein |
| Mv_NIES-102_01986                                    | Y                             | 100%          | 100%                          | 290       |      | hypothetical protein |
| Mv_NIES-102_01987                                    | Y                             | 100%          | 100%                          | 419       |      | hypothetical protein |
| Mv_NIES-102_02001                                    | Y                             | 100%          | 100%                          | 935       |      | hypothetical protein |
| Mv_NIES-102_02042                                    | Y                             | 100%          | 100%                          | 1214      |      | hypothetical protein |
| Mv_NIES-102_02048                                    | Y                             | 100%          | 100%                          | 1679      |      | hypothetical protein |
| Mv_NIES-102_02049                                    | Y                             | 100%          | 100%                          | 1997      |      | hypothetical protein |
| Mv_NIES-102_02050                                    | Y                             | 100%          | 100%                          | 503       |      | hypothetical protein |
| Mv_NIES-102_02051                                    | Y                             | 100%          | 100%                          | 890       |      | hypothetical protein |
| Mv_NIES-102_02054                                    | Y                             | 100%          | 100%                          | 392       |      | hypothetical protein |
| Mv_NIES-102_02059                                    | Y                             | 100%          | 100%                          | 302       |      | hypothetical protein |
| Mv_NIES-102_02063                                    | Y                             | 100%          | 100%                          | 782       |      | hypothetical protein |
| Mv_NIES-102_02069                                    | Y                             | 100%          | 100%                          | 431       |      | hypothetical protein |
| Mv_NIES-102_02086                                    | Y                             | 100%          | 100%                          | 1277      |      | hypothetical protein |
| Mv_NIES-102_02097                                    | Y                             | 100%          | 100%                          | 800       |      | hypothetical protein |
| Mv_NIES-102_02098                                    | Y                             | 100%          | 100%                          | 626       |      | hypothetical protein |
| Mv_NIES-102_02116                                    | Y                             | 100%          | 100%                          | 788       |      | hypothetical protein |
| Mv_NIES-102_02135                                    | Y                             | 100%          | 100%                          | 737       |      | hypothetical protein |
| Mv_NIES-102_02137                                    | Y                             | 100%          | 100%                          | 419       |      | hypothetical protein |
| Mv_NIES-102_02140                                    | Y                             | 100%          | 100%                          | 533       |      | hypothetical protein |
| Mv_NIES-102_02175                                    | Y                             | 100%          | 100%                          | 419       |      | hypothetical protein |
| Mv_NIES-102_02179                                    | Y                             | 100%          | 100%                          | 239       |      | hypothetical protein |
| Mv_NIES-102_02196                                    | Y                             | 100%          | 100%                          | 566       |      | hypothetical protein |
| Mv_NIES-102_02232                                    | Y                             | 100%          | 100%                          | 398       |      | hypothetical protein |
| Mv_NIES-102_02234                                    | Y                             | 100%          | 100%                          | 662       |      | hypothetical protein |
| Mv_NIES-102_02235                                    | Y                             | 100%          | 100%                          | 1958      |      | hypothetical protein |
| Mv_NIES-102_02241                                    | Y                             | 100%          | 100%                          | 386       |      | hypothetical protein |
| Mv_NIES-102_02271                                    | Y                             | 100%          | 100%                          | 1433      |      | hypothetical protein |
| Mv_NIES-102_02280                                    | Y                             | 100%          | 100%                          | 635       |      | hypothetical protein |
| Mv_NIES-102_02321                                    | Y                             | 100%          | 100%                          | 1088      |      | hypothetical protein |
| Mv_NIES-102_02333                                    | Y                             | 100%          | 100%                          | 1190      |      | hypothetical protein |
| Mv_NIES-102_02352                                    | Y                             | 100%          | 100%                          | 1727      |      | hypothetical protein |
| Mv_NIES-102_02356                                    | Y                             | 100%          | 100%                          | 374       |      | hypothetical protein |
| Mv_NIES-102_02357                                    | Y                             | 100%          | 100%                          | 494       |      | hypothetical protein |
| Mv_NIES-102_02358                                    | Y                             | 100%          | 100%                          | 1151      |      | hypothetical protein |
| Mv_NIES-102_02359                                    | Y                             | 100%          | 100%                          | 1850      |      | hypothetical protein |

| Representative gene<br>(Mv_NIES-102 as<br>reference) | Used for core<br>genome tree? | %<br>presence | % intact &<br>single-<br>copy | No.<br>BP | Name | Product              |
|------------------------------------------------------|-------------------------------|---------------|-------------------------------|-----------|------|----------------------|
| Mv_NIES-102_02376                                    | Y                             | 100%          | 100%                          | 221       |      | hypothetical protein |
| Mv_NIES-102_02421                                    | Y                             | 100%          | 100%                          | 470       |      | hypothetical protein |
| Mv_NIES-102_02437                                    | Y                             | 100%          | 100%                          | 1217      |      | hypothetical protein |
| Mv_NIES-102_02456                                    | Y                             | 100%          | 100%                          | 605       |      | hypothetical protein |
| Mv_NIES-102_02468                                    | Y                             | 100%          | 100%                          | 1250      |      | hypothetical protein |
| Mv_NIES-102_02470                                    | Y                             | 100%          | 100%                          | 1241      |      | hypothetical protein |
| Mv_NIES-102_02473                                    | Y                             | 100%          | 100%                          | 506       |      | hypothetical protein |
| Mv_NIES-102_02488                                    | Y                             | 100%          | 100%                          | 1811      |      | hypothetical protein |
| Mv_NIES-102_02489                                    | Y                             | 100%          | 100%                          | 1001      |      | hypothetical protein |
| Mv_NIES-102_02507                                    | Y                             | 100%          | 100%                          | 743       |      | hypothetical protein |
| Mv_NIES-102_02537                                    | Y                             | 100%          | 100%                          | 248       |      | hypothetical protein |
| Mv_NIES-102_02542                                    | Y                             | 100%          | 100%                          | 1169      |      | hypothetical protein |
| Mv_NIES-102_02545                                    | Y                             | 100%          | 100%                          | 425       |      | hypothetical protein |
| Mv_NIES-102_02547                                    | Y                             | 100%          | 100%                          | 299       |      | hypothetical protein |
| Mv_NIES-102_02554                                    | Y                             | 100%          | 100%                          | 215       |      | hypothetical protein |
| Mv_NIES-102_02555                                    | Y                             | 100%          | 100%                          | 965       |      | hypothetical protein |
| Mv_NIES-102_02556                                    | Y                             | 100%          | 100%                          | 341       |      | hypothetical protein |
| Mv_NIES-102_02576                                    | Y                             | 100%          | 100%                          | 668       |      | hypothetical protein |
| Mv_NIES-102_02610                                    | Y                             | 100%          | 100%                          | 389       |      | hypothetical protein |
| Mv_NIES-102_02611                                    | Y                             | 100%          | 100%                          | 341       |      | hypothetical protein |
| Mv_NIES-102_02615                                    | Y                             | 100%          | 100%                          | 1001      |      | hypothetical protein |
| Mv_NIES-102_02616                                    | Y                             | 100%          | 100%                          | 215       |      | hypothetical protein |
| Mv_NIES-102_02617                                    | Y                             | 100%          | 100%                          | 386       |      | hypothetical protein |
| Mv_NIES-102_02618                                    | Y                             | 100%          | 100%                          | 407       |      | hypothetical protein |
| Mv_NIES-102_02630                                    | Y                             | 100%          | 100%                          | 410       |      | hypothetical protein |
| Mv_NIES-102_02638                                    | Y                             | 100%          | 100%                          | 830       |      | hypothetical protein |
| Mv_NIES-102_02656                                    | Y                             | 100%          | 100%                          | 767       |      | hypothetical protein |
| Mv_NIES-102_02686                                    | Y                             | 100%          | 100%                          | 380       |      | hypothetical protein |
| Mv_NIES-102_02697                                    | Y                             | 100%          | 100%                          | 200       |      | hypothetical protein |
| Mv_NIES-102_02699                                    | Y                             | 100%          | 100%                          | 1097      |      | hypothetical protein |
| Mv_NIES-102_02702                                    | Y                             | 100%          | 100%                          | 554       |      | hypothetical protein |
| Mv_NIES-102_02709                                    | Y                             | 100%          | 100%                          | 1136      |      | hypothetical protein |
| Mv_NIES-102_02713                                    | Y                             | 100%          | 100%                          | 2438      |      | hypothetical protein |
| Mv_NIES-102_02717                                    | Y                             | 100%          | 100%                          | 356       |      | hypothetical protein |
| Mv_NIES-102_02720                                    | Y                             | 100%          | 100%                          | 2135      |      | hypothetical protein |
| Mv_NIES-102_02723                                    | Y                             | 100%          | 100%                          | 266       |      | hypothetical protein |
| Mv_NIES-102_02724                                    | Y                             | 100%          | 100%                          | 887       |      | hypothetical protein |
| Mv_NIES-102_02743                                    | Y                             | 100%          | 100%                          | 383       |      | hypothetical protein |
| Mv_NIES-102_02745                                    | Y                             | 100%          | 100%                          | 548       |      | hypothetical protein |
| Mv_NIES-102_02753                                    | Y                             | 100%          | 100%                          | 914       |      | hypothetical protein |
| Mv_NIES-102_02757                                    | Y                             | 100%          | 100%                          | 623       |      | hypothetical protein |
| Mv_NIES-102_02758                                    | Y                             | 100%          | 100%                          | 1484      |      | hypothetical protein |
| Mv_NIES-102_02759                                    | Y                             | 100%          | 100%                          | 671       |      | hypothetical protein |
| Mv_NIES-102_02762                                    | Y                             | 100%          | 100%                          | 416       |      | hypothetical protein |
| Mv_NIES-102_02764                                    | Y                             | 100%          | 100%                          | 1955      |      | hypothetical protein |
| Mv_NIES-102_02775                                    | Y                             | 100%          | 100%                          | 587       |      | hypothetical protein |
| Mv_NIES-102_02776                                    | Y                             | 100%          | 100%                          | 596       |      | hypothetical protein |
| Mv_NIES-102_02778                                    | Y                             | 100%          | 100%                          | 1127      |      | hypothetical protein |
| Mv_NIES-102_02783                                    | Y                             | 100%          | 100%                          | 1964      |      | hypothetical protein |

| Representative gene<br>(Mv_NIES-102 as<br>reference) | Used for core<br>genome tree? | %<br>presence | % intact &<br>single-<br>copy | No.<br>BP | Name | Product              |
|------------------------------------------------------|-------------------------------|---------------|-------------------------------|-----------|------|----------------------|
| Mv_NIES-102_02794                                    | Y                             | 100%          | 100%                          | 3236      |      | hypothetical protein |
| Mv_NIES-102_02796                                    | Y                             | 100%          | 100%                          | 425       |      | hypothetical protein |
| Mv_NIES-102_02817                                    | Y                             | 100%          | 100%                          | 1823      |      | hypothetical protein |
| Mv_NIES-102_02818                                    | Y                             | 100%          | 100%                          | 323       |      | hypothetical protein |
| Mv_NIES-102_02819                                    | Y                             | 100%          | 100%                          | 518       |      | hypothetical protein |
| Mv_NIES-102_02823                                    | Y                             | 100%          | 100%                          | 1547      |      | hypothetical protein |
| Mv_NIES-102_02824                                    | Y                             | 100%          | 100%                          | 335       |      | hypothetical protein |
| Mv_NIES-102_02832                                    | Y                             | 100%          | 100%                          | 515       |      | hypothetical protein |
| Mv_NIES-102_02838                                    | Y                             | 100%          | 100%                          | 281       |      | hypothetical protein |
| Mv_NIES-102_02874                                    | Y                             | 100%          | 100%                          | 689       |      | hypothetical protein |
| Mv_NIES-102_02875                                    | Y                             | 100%          | 100%                          | 233       |      | hypothetical protein |
| Mv_NIES-102_02925                                    | Y                             | 100%          | 100%                          | 1898      |      | hypothetical protein |
| Mv_NIES-102_02952                                    | Y                             | 100%          | 100%                          | 347       |      | hypothetical protein |
| Mv_NIES-102_02954                                    | Y                             | 100%          | 100%                          | 536       |      | hypothetical protein |
| Mv_NIES-102_02959                                    | Y                             | 100%          | 100%                          | 272       |      | hypothetical protein |
| Mv_NIES-102_03004                                    | Y                             | 100%          | 100%                          | 920       |      | hypothetical protein |
| Mv_NIES-102_03029                                    | Y                             | 100%          | 100%                          | 785       |      | hypothetical protein |
| Mv_NIES-102_03037                                    | Y                             | 100%          | 100%                          | 1373      |      | hypothetical protein |
| Mv_NIES-102_03075                                    | Y                             | 100%          | 100%                          | 740       |      | hypothetical protein |
| Mv_NIES-102_03076                                    | Y                             | 100%          | 100%                          | 704       |      | hypothetical protein |
| Mv_NIES-102_03099                                    | Y                             | 100%          | 100%                          | 218       |      | hypothetical protein |
| Mv_NIES-102_03109                                    | Y                             | 100%          | 100%                          | 485       |      | hypothetical protein |
| Mv_NIES-102_03121                                    | Y                             | 100%          | 100%                          | 365       |      | hypothetical protein |
| Mv_NIES-102_03146                                    | Y                             | 100%          | 100%                          | 1484      |      | hypothetical protein |
| Mv_NIES-102_03147                                    | Y                             | 100%          | 100%                          | 1307      |      | hypothetical protein |
| Mv_NIES-102_03150                                    | Y                             | 100%          | 100%                          | 2120      |      | hypothetical protein |
| Mv_NIES-102_03156                                    | Y                             | 100%          | 100%                          | 893       |      | hypothetical protein |
| Mv_NIES-102_03180                                    | Y                             | 100%          | 100%                          | 1139      |      | hypothetical protein |
| Mv_NIES-102_03182                                    | Y                             | 100%          | 100%                          | 767       |      | hypothetical protein |
| Mv_NIES-102_03184                                    | Y                             | 100%          | 100%                          | 533       |      | hypothetical protein |
| Mv_NIES-102_03233                                    | Y                             | 100%          | 100%                          | 386       |      | hypothetical protein |
| Mv_NIES-102_03236                                    | Y                             | 100%          | 100%                          | 2159      |      | hypothetical protein |
| Mv_NIES-102_03251                                    | Y                             | 100%          | 100%                          | 983       |      | hypothetical protein |
| Mv_NIES-102_03273                                    | Y                             | 100%          | 100%                          | 389       |      | hypothetical protein |
| Mv_NIES-102_03275                                    | Y                             | 100%          | 100%                          | 1187      |      | hypothetical protein |
| Mv_NIES-102_03276                                    | Y                             | 100%          | 100%                          | 1175      |      | hypothetical protein |
| Mv_NIES-102_03277                                    | Y                             | 100%          | 100%                          | 551       |      | hypothetical protein |
| Mv_NIES-102_03279                                    | Y                             | 100%          | 100%                          | 443       |      | hypothetical protein |
| Mv_NIES-102_03285                                    | Y                             | 100%          | 100%                          | 1169      |      | hypothetical protein |
| Mv_NIES-102_03287                                    | Y                             | 100%          | 100%                          | 578       |      | hypothetical protein |
| Mv_NIES-102_03313                                    | Y                             | 100%          | 100%                          | 1514      |      | hypothetical protein |
| Mv_NIES-102_03314                                    | Y                             | 100%          | 100%                          | 683       |      | hypothetical protein |
| Mv_NIES-102_03317                                    | Y                             | 100%          | 100%                          | 212       |      | hypothetical protein |
| Mv_NIES-102_03334                                    | Y                             | 100%          | 100%                          | 947       |      | hypothetical protein |
| Mv_NIES-102_03341                                    | Y                             | 100%          | 100%                          | 581       |      | hypothetical protein |
| Mv_NIES-102_03343                                    | Y                             | 100%          | 100%                          | 1058      |      | hypothetical protein |
| Mv_NIES-102_03375                                    | Y                             | 100%          | 100%                          | 749       |      | hypothetical protein |
| Mv_NIES-102_03386                                    | Y                             | 100%          | 100%                          | 659       |      | hypothetical protein |
| Mv_NIES-102_03427                                    | Y                             | 100%          | 100%                          | 323       |      | hypothetical protein |

| Representative gene<br>(Mv_NIES-102 as<br>reference) | Used for core<br>genome tree? | %<br>presence | % intact &<br>single-<br>copy | No.<br>BP | Name | Product              |
|------------------------------------------------------|-------------------------------|---------------|-------------------------------|-----------|------|----------------------|
| Mv_NIES-102_03434                                    | Y                             | 100%          | 100%                          | 1190      |      | hypothetical protein |
| Mv_NIES-102_03442                                    | Y                             | 100%          | 100%                          | 293       |      | hypothetical protein |
| Mv_NIES-102_03443                                    | Y                             | 100%          | 100%                          | 1055      |      | hypothetical protein |
| Mv_NIES-102_03450                                    | Y                             | 100%          | 100%                          | 914       |      | hypothetical protein |
| Mv_NIES-102_03451                                    | Y                             | 100%          | 100%                          | 1187      |      | hypothetical protein |
| Mv_NIES-102_03455                                    | Y                             | 100%          | 100%                          | 1796      |      | hypothetical protein |
| Mv_NIES-102_03534                                    | Y                             | 100%          | 100%                          | 290       |      | hypothetical protein |
| Mv_NIES-102_03536                                    | Y                             | 100%          | 100%                          | 674       |      | hypothetical protein |
| Mv_NIES-102_03537                                    | Y                             | 100%          | 100%                          | 410       |      | hypothetical protein |
| Mv_NIES-102_03558                                    | Y                             | 100%          | 100%                          | 275       |      | hypothetical protein |
| Mv_NIES-102_03559                                    | Y                             | 100%          | 100%                          | 560       |      | hypothetical protein |
| Mv_NIES-102_03568                                    | Y                             | 100%          | 100%                          | 239       |      | hypothetical protein |
| Mv_NIES-102_03573                                    | Y                             | 100%          | 100%                          | 1184      |      | hypothetical protein |
| Mv_NIES-102_03610                                    | Y                             | 100%          | 100%                          | 398       |      | hypothetical protein |
| Mv_NIES-102_03667                                    | Y                             | 100%          | 100%                          | 620       |      | hypothetical protein |
| Mv_NIES-102_03671                                    | Y                             | 100%          | 100%                          | 545       |      | hypothetical protein |
| Mv_NIES-102_03684                                    | Y                             | 100%          | 100%                          | 653       |      | hypothetical protein |
| Mv_NIES-102_03690                                    | Y                             | 100%          | 100%                          | 260       |      | hypothetical protein |
| Mv_NIES-102_03694                                    | Y                             | 100%          | 100%                          | 638       |      | hypothetical protein |
| Mv_NIES-102_03695                                    | Y                             | 100%          | 100%                          | 293       |      | hypothetical protein |
| Mv_NIES-102_03698                                    | Y                             | 100%          | 100%                          | 1115      |      | hypothetical protein |
| Mv_NIES-102_03750                                    | Y                             | 100%          | 100%                          | 611       |      | hypothetical protein |
| Mv_NIES-102_03757                                    | Y                             | 100%          | 100%                          | 263       |      | hypothetical protein |
| Mv_NIES-102_03773                                    | Y                             | 100%          | 100%                          | 509       |      | hypothetical protein |
| Mv_NIES-102_03775                                    | Y                             | 100%          | 100%                          | 485       |      | hypothetical protein |
| Mv_NIES-102_03851                                    | Y                             | 100%          | 100%                          | 650       |      | hypothetical protein |
| Mv_NIES-102_03872                                    | Y                             | 100%          | 100%                          | 1916      |      | hypothetical protein |
| Mv_NIES-102_03873                                    | Y                             | 100%          | 100%                          | 353       |      | hypothetical protein |
| Mv_NIES-102_03874                                    | Y                             | 100%          | 100%                          | 551       |      | hypothetical protein |
| Mv_NIES-102_03893                                    | Y                             | 100%          | 100%                          | 938       |      | hypothetical protein |
| Mv_NIES-102_03910                                    | Y                             | 100%          | 100%                          | 440       |      | hypothetical protein |
| Mv_NIES-102_03912                                    | Y                             | 100%          | 100%                          | 434       |      | hypothetical protein |
| Mv_NIES-102_03924                                    | Y                             | 100%          | 100%                          | 572       |      | hypothetical protein |
| Mv_NIES-102_03928                                    | Y                             | 100%          | 100%                          | 674       |      | hypothetical protein |
| Mv_NIES-102_03929                                    | Y                             | 100%          | 100%                          | 200       |      | hypothetical protein |
| Mv_NIES-102_03930                                    | Y                             | 100%          | 100%                          | 881       |      | hypothetical protein |
| Mv_NIES-102_03938                                    | Y                             | 100%          | 100%                          | 1448      |      | hypothetical protein |
| Mv_NIES-102_03960                                    | Y                             | 100%          | 100%                          | 551       |      | hypothetical protein |
| Mv_NIES-102_03961                                    | Y                             | 100%          | 100%                          | 656       |      | hypothetical protein |
| Mv_NIES-102_03962                                    | Y                             | 100%          | 100%                          | 590       |      | hypothetical protein |
| Mv_NIES-102_03966                                    | Y                             | 100%          | 100%                          | 608       |      | hypothetical protein |
| Mv_NIES-102_03967                                    | Y                             | 100%          | 100%                          | 326       |      | hypothetical protein |
| Mv_NIES-102_03973                                    | Y                             | 100%          | 100%                          | 455       |      | hypothetical protein |
| Mv_NIES-102_03977                                    | Y                             | 100%          | 100%                          | 620       |      | hypothetical protein |
| Mv_NIES-102_03979                                    | Y                             | 100%          | 100%                          | 1424      |      | hypothetical protein |
| Mv_NIES-102_03994                                    | Y                             | 100%          | 100%                          | 920       |      | hypothetical protein |
| Mv_NIES-102_04017                                    | Y                             | 100%          | 100%                          | 470       |      | hypothetical protein |
| Mv_NIES-102_04027                                    | Y                             | 100%          | 100%                          | 764       |      | hypothetical protein |
| Mv_NIES-102_04059                                    | Y                             | 100%          | 100%                          | 1406      |      | hypothetical protein |

| Representative gene<br>(Mv_NIES-102 as<br>reference) | Used for core<br>genome tree? | %<br>presence | % intact &<br>single-<br>copy | No.<br>BP | Name | Product              |
|------------------------------------------------------|-------------------------------|---------------|-------------------------------|-----------|------|----------------------|
| Mv_NIES-102_04066                                    | Y                             | 100%          | 100%                          | 1658      |      | hypothetical protein |
| Mv_NIES-102_04072                                    | Y                             | 100%          | 100%                          | 494       |      | hypothetical protein |
| Mv_NIES-102_04074                                    | Y                             | 100%          | 100%                          | 395       |      | hypothetical protein |
| Mv_NIES-102_04076                                    | Y                             | 100%          | 100%                          | 1964      |      | hypothetical protein |
| Mv_NIES-102_04085                                    | Y                             | 100%          | 100%                          | 2570      |      | hypothetical protein |
| Mv_NIES-102_04123                                    | Y                             | 100%          | 100%                          | 395       |      | hypothetical protein |
| Mv_NIES-102_04124                                    | Y                             | 100%          | 100%                          | 530       |      | hypothetical protein |
| Mv_NIES-102_04129                                    | Y                             | 100%          | 100%                          | 524       |      | hypothetical protein |
| Mv_NIES-102_04137                                    | Y                             | 100%          | 100%                          | 215       |      | hypothetical protein |
| Mv_NIES-102_04139                                    | Y                             | 100%          | 100%                          | 1343      |      | hypothetical protein |
| Mv_NIES-102_04146                                    | Y                             | 100%          | 100%                          | 416       |      | hypothetical protein |
| Mv_NIES-102_04147                                    | Y                             | 100%          | 100%                          | 1280      |      | hypothetical protein |
| Mv_NIES-102_04172                                    | Y                             | 100%          | 100%                          | 1223      |      | hypothetical protein |
| Mv_NIES-102_04173                                    | Y                             | 100%          | 100%                          | 494       |      | hypothetical protein |
| Mv_NIES-102_04200                                    | Y                             | 100%          | 100%                          | 1664      |      | hypothetical protein |
| Mv_NIES-102_04201                                    | Y                             | 100%          | 100%                          | 266       |      | hypothetical protein |
| Mv_NIES-102_04207                                    | Y                             | 100%          | 100%                          | 557       |      | hypothetical protein |
| Mv_NIES-102_04218                                    | Y                             | 100%          | 100%                          | 953       |      | hypothetical protein |
| Mv_NIES-102_04219                                    | Y                             | 100%          | 100%                          | 503       |      | hypothetical protein |
| Mv_NIES-102_04221                                    | Y                             | 100%          | 100%                          | 596       |      | hypothetical protein |
| Mv_NIES-102_04243                                    | Y                             | 100%          | 100%                          | 1331      |      | hypothetical protein |
| Mv_NIES-102_04252                                    | Y                             | 100%          | 100%                          | 1247      |      | hypothetical protein |
| Mv_NIES-102_04254                                    | Y                             | 100%          | 100%                          | 479       |      | hypothetical protein |
| Mv_NIES-102_04259                                    | Y                             | 100%          | 100%                          | 674       |      | hypothetical protein |
| Mv_NIES-102_04274                                    | Y                             | 100%          | 100%                          | 1154      |      | hypothetical protein |
| Mv_NIES-102_04275                                    | Y                             | 100%          | 100%                          | 1160      |      | hypothetical protein |
| Mv_NIES-102_04278                                    | Y                             | 100%          | 100%                          | 332       |      | hypothetical protein |
| Mv_NIES-102_04279                                    | Y                             | 100%          | 100%                          | 605       |      | hypothetical protein |
| Mv_NIES-102_04291                                    | Y                             | 100%          | 100%                          | 842       |      | hypothetical protein |
| Mv_NIES-102_04304                                    | Y                             | 100%          | 100%                          | 2312      |      | hypothetical protein |
| Mv_NIES-102_04307                                    | Y                             | 100%          | 100%                          | 464       |      | hypothetical protein |
| Mv_NIES-102_04308                                    | Y                             | 100%          | 100%                          | 203       |      | hypothetical protein |
| Mv_NIES-102_04309                                    | Y                             | 100%          | 100%                          | 512       |      | hypothetical protein |
| Mv_NIES-102_04310                                    | Y                             | 100%          | 100%                          | 497       |      | hypothetical protein |
| Mv_NIES-102_04313                                    | Y                             | 100%          | 100%                          | 239       |      | hypothetical protein |
| Mv_NIES-102_04319                                    | Y                             | 100%          | 100%                          | 977       |      | hypothetical protein |
| Mv_NIES-102_04324                                    | Y                             | 100%          | 100%                          | 797       |      | hypothetical protein |
| Mv_NIES-102_04325                                    | Y                             | 100%          | 100%                          | 659       |      | hypothetical protein |
| Mv_NIES-102_04327                                    | Y                             | 100%          | 100%                          | 284       |      | hypothetical protein |
| Mv_NIES-102_04331                                    | Y                             | 100%          | 100%                          | 224       |      | hypothetical protein |
| Mv_NIES-102_04351                                    | Y                             | 100%          | 100%                          | 284       |      | hypothetical protein |
| Mv_NIES-102_04355                                    | Y                             | 100%          | 100%                          | 941       |      | hypothetical protein |
| Mv_NIES-102_04380                                    | Y                             | 100%          | 100%                          | 551       |      | hypothetical protein |
| Mv_NIES-102_04381                                    | Y                             | 100%          | 100%                          | 317       |      | hypothetical protein |
| Mv_NIES-102_04382                                    | Y                             | 100%          | 100%                          | 152       |      | hypothetical protein |
| Mv_NIES-102_04383                                    | Y                             | 100%          | 100%                          | 890       |      | hypothetical protein |
| Mv_NIES-102_04408                                    | Y                             | 100%          | 100%                          | 452       |      | hypothetical protein |
| Mv_NIES-102_04414                                    | Y                             | 100%          | 100%                          | 242       |      | hypothetical protein |
| Mv_NIES-102_04415                                    | Y                             | 100%          | 100%                          | 815       |      | hypothetical protein |

| Representative gene<br>(Mv_NIES-102 as<br>reference) | Used for core<br>genome tree? | %<br>presence | % intact &<br>single-<br>copy | No.<br>BP | Name | Product              |
|------------------------------------------------------|-------------------------------|---------------|-------------------------------|-----------|------|----------------------|
| Mv_NIES-102_04416                                    | Y                             | 100%          | 100%                          | 680       |      | hypothetical protein |
| Mv_NIES-102_04417                                    | Y                             | 100%          | 100%                          | 1061      |      | hypothetical protein |
| Mv_NIES-102_04418                                    | Y                             | 100%          | 100%                          | 440       |      | hypothetical protein |
| Mv_NIES-102_04425                                    | Y                             | 100%          | 100%                          | 734       |      | hypothetical protein |
| Mv_NIES-102_04437                                    | Y                             | 100%          | 100%                          | 1490      |      | hypothetical protein |
| Mv_NIES-102_04439                                    | Y                             | 100%          | 100%                          | 389       |      | hypothetical protein |
| Mv_NIES-102_04446                                    | Y                             | 100%          | 100%                          | 2282      |      | hypothetical protein |
| Mv_NIES-102_04447                                    | Y                             | 100%          | 100%                          | 254       |      | hypothetical protein |
| Mv_NIES-102_04468                                    | Y                             | 100%          | 100%                          | 176       |      | hypothetical protein |
| Mv_NIES-102_04469                                    | Y                             | 100%          | 100%                          | 1058      |      | hypothetical protein |
| Mv_NIES-102_04470                                    | Y                             | 100%          | 100%                          | 581       |      | hypothetical protein |
| Mv_NIES-102_04472                                    | Y                             | 100%          | 100%                          | 2354      |      | hypothetical protein |
| Mv_NIES-102_04473                                    | Y                             | 100%          | 100%                          | 1568      |      | hypothetical protein |
| Mv_NIES-102_04474                                    | Y                             | 100%          | 100%                          | 464       |      | hypothetical protein |
| Mv_NIES-102_04476                                    | Y                             | 100%          | 100%                          | 629       |      | hypothetical protein |
| Mv_NIES-102_04537                                    | Y                             | 100%          | 100%                          | 875       |      | hypothetical protein |
| Mv_NIES-102_04577                                    | Y                             | 100%          | 100%                          | 719       |      | hypothetical protein |
| Mv_NIES-102_04579                                    | Y                             | 100%          | 100%                          | 350       |      | hypothetical protein |
| Mv_NIES-102_04583                                    | Y                             | 100%          | 100%                          | 2651      |      | hypothetical protein |
| Mv_NIES-102_04585                                    | Y                             | 100%          | 100%                          | 1112      |      | hypothetical protein |
| Mv_NIES-102_04589                                    | Y                             | 100%          | 100%                          | 251       |      | hypothetical protein |
| Mv_NIES-102_04629                                    | Y                             | 100%          | 100%                          | 563       |      | hypothetical protein |
| Mv_NIES-102_04631                                    | Y                             | 100%          | 100%                          | 272       |      | hypothetical protein |
| Mv_NIES-102_04647                                    | Y                             | 100%          | 100%                          | 1148      |      | hypothetical protein |
| Mv_NIES-102_04653                                    | Y                             | 100%          | 100%                          | 173       |      | hypothetical protein |
| Mv_NIES-102_04654                                    | Y                             | 100%          | 100%                          | 368       |      | hypothetical protein |
| Mv_NIES-102_04655                                    | Y                             | 100%          | 100%                          | 1811      |      | hypothetical protein |
| Mv_NIES-102_04723                                    | Y                             | 100%          | 100%                          | 1511      |      | hypothetical protein |
| Mv_NIES-102_04731                                    | Y                             | 100%          | 100%                          | 731       |      | hypothetical protein |
| Mv_NIES-102_04735                                    | Y                             | 100%          | 100%                          | 791       |      | hypothetical protein |
| Mv_NIES-102_04742                                    | Y                             | 100%          | 100%                          | 791       |      | hypothetical protein |
| Mv_NIES-102_04753                                    | Y                             | 100%          | 100%                          | 410       |      | hypothetical protein |
| Mv_NIES-102_04783                                    | Y                             | 100%          | 100%                          | 206       |      | hypothetical protein |
| Mv_NIES-102_04788                                    | Y                             | 100%          | 100%                          | 461       |      | hypothetical protein |
| Mv_NIES-102_04792                                    | Y                             | 100%          | 100%                          | 362       |      | hypothetical protein |
| Mv_NIES-102_04802                                    | Y                             | 100%          | 100%                          | 1352      |      | hypothetical protein |
| Mv_NIES-102_04805                                    | Y                             | 100%          | 100%                          | 410       |      | hypothetical protein |
| Mv_NIES-102_04809                                    | Y                             | 100%          | 100%                          | 1055      |      | hypothetical protein |
| Mv_NIES-102_04860                                    | Y                             | 100%          | 100%                          | 842       |      | hypothetical protein |
| Mv_NIES-102_04903                                    | Y                             | 100%          | 100%                          | 1799      |      | hypothetical protein |
| Mv_NIES-102_04904                                    | Y                             | 100%          | 100%                          | 536       |      | hypothetical protein |
| Mv_NIES-102_04908                                    | Y                             | 100%          | 100%                          | 953       |      | hypothetical protein |
| Mv_NIES-102_04909                                    | Y                             | 100%          | 100%                          | 509       |      | hypothetical protein |
| Mv_NIES-102_04910                                    | Y                             | 100%          | 100%                          | 962       |      | hypothetical protein |
| Mv_NIES-102_04911                                    | Y                             | 100%          | 100%                          | 602       |      | hypothetical protein |
| Mv_NIES-102_04914                                    | Y                             | 100%          | 100%                          | 1118      |      | hypothetical protein |
| Mv_NIES-102_04936                                    | Y                             | 100%          | 100%                          | 377       |      | hypothetical protein |
| Mv_NIES-102_04937                                    | Y                             | 100%          | 100%                          | 419       |      | hypothetical protein |
| Mv_NIES-102_04944                                    | Y                             | 100%          | 100%                          | 1244      |      | hypothetical protein |

| Representative gene<br>(Mv_NIES-102 as<br>reference) | Used for core<br>genome tree? | %<br>presence | % intact &<br>single-<br>copy | No.<br>BP | Name | Product              |
|------------------------------------------------------|-------------------------------|---------------|-------------------------------|-----------|------|----------------------|
| Mv_NIES-102_04950                                    | Y                             | 100%          | 100%                          | 1661      |      | hypothetical protein |
| Mv_NIES-102_04967                                    | Y                             | 100%          | 100%                          | 962       |      | hypothetical protein |
| Mv_NIES-102_04968                                    | Y                             | 100%          | 100%                          | 1001      |      | hypothetical protein |
| Mv_NIES-102_04969                                    | Y                             | 100%          | 100%                          | 983       |      | hypothetical protein |
| Mv_NIES-102_04970                                    | Y                             | 100%          | 100%                          | 386       |      | hypothetical protein |
| Mv_NIES-102_04972                                    | Y                             | 100%          | 100%                          | 794       |      | hypothetical protein |
| Mv_NIES-102_04973                                    | Y                             | 100%          | 100%                          | 797       |      | hypothetical protein |
| Mv_NIES-102_05021                                    | Y                             | 100%          | 100%                          | 569       |      | hypothetical protein |
| Mv_NIES-102_05023                                    | Y                             | 100%          | 100%                          | 281       |      | hypothetical protein |
| Mv_NIES-102_05028                                    | Y                             | 100%          | 100%                          | 320       |      | hypothetical protein |
| Mv_NIES-102_05030                                    | Y                             | 100%          | 100%                          | 377       |      | hypothetical protein |
| Mv_NIES-102_05031                                    | Y                             | 100%          | 100%                          | 1076      |      | hypothetical protein |
| Mv_NIES-102_05035                                    | Y                             | 100%          | 100%                          | 353       |      | hypothetical protein |
| Mv_NIES-102_05067                                    | Y                             | 100%          | 100%                          | 941       |      | hypothetical protein |
| Mv_NIES-102_05084                                    | Y                             | 100%          | 100%                          | 245       |      | hypothetical protein |
| Mv_NIES-102_05086                                    | Y                             | 100%          | 100%                          | 1121      |      | hypothetical protein |
| Mv_NIES-102_05087                                    | Y                             | 100%          | 100%                          | 1163      |      | hypothetical protein |
| Mv_NIES-102_05092                                    | Y                             | 100%          | 100%                          | 725       |      | hypothetical protein |
| Mv_NIES-102_05094                                    | Y                             | 100%          | 100%                          | 1295      |      | hypothetical protein |
| Mv_NIES-102_05104                                    | Y                             | 100%          | 100%                          | 782       |      | hypothetical protein |
| Mv_NIES-102_05110                                    | Y                             | 100%          | 100%                          | 1340      |      | hypothetical protein |
| Mv_NIES-102_05111                                    | Y                             | 100%          | 100%                          | 164       |      | hypothetical protein |
| Mv_NIES-102_05148                                    | Y                             | 100%          | 100%                          | 1367      |      | hypothetical protein |
| Mv_NIES-102_05150                                    | Y                             | 100%          | 100%                          | 212       |      | hypothetical protein |
| Mv_NIES-102_05152                                    | Y                             | 100%          | 100%                          | 467       |      | hypothetical protein |
| Mv_NIES-102_05155                                    | Y                             | 100%          | 100%                          | 797       |      | hypothetical protein |
| Mv_NIES-102_05163                                    | Y                             | 100%          | 100%                          | 1589      |      | hypothetical protein |
| Mv_NIES-102_05173                                    | Y                             | 100%          | 100%                          | 596       |      | hypothetical protein |
| Mv_NIES-102_05179                                    | Y                             | 100%          | 100%                          | 473       |      | hypothetical protein |
| Mv_NIES-102_05181                                    | Y                             | 100%          | 100%                          | 179       |      | hypothetical protein |
| Mv_NIES-102_05243                                    | Y                             | 100%          | 100%                          | 131       |      | hypothetical protein |
| Mv_NIES-102_05250                                    | Y                             | 100%          | 100%                          | 386       |      | hypothetical protein |
| Mv_NIES-102_05269                                    | Y                             | 100%          | 100%                          | 677       |      | hypothetical protein |
| Mv_NIES-102_05279                                    | Y                             | 100%          | 100%                          | 1583      |      | hypothetical protein |
| Mv_NIES-102_05281                                    | Y                             | 100%          | 100%                          | 461       |      | hypothetical protein |
| Mv_NIES-102_05282                                    | Y                             | 100%          | 100%                          | 308       |      | hypothetical protein |
| Mv_NIES-102_05291                                    | Y                             | 100%          | 100%                          | 1652      |      | hypothetical protein |
| Mv_NIES-102_05292                                    | Y                             | 100%          | 100%                          | 2051      |      | hypothetical protein |
| Mv_NIES-102_05299                                    | Y                             | 100%          | 100%                          | 1304      |      | hypothetical protein |
| Mv_NIES-102_05300                                    | Y                             | 100%          | 100%                          | 428       |      | hypothetical protein |
| Mv_NIES-102_05311                                    | Y                             | 100%          | 100%                          | 2750      |      | hypothetical protein |
| Mv_NIES-102_05315                                    | Y                             | 100%          | 100%                          | 653       |      | hypothetical protein |
| Mv_NIES-102_05317                                    | Y                             | 100%          | 100%                          | 1196      |      | hypothetical protein |
| Mv_NIES-102_05320                                    | Y                             | 100%          | 100%                          | 1262      |      | hypothetical protein |
| Mv_NIES-102_05323                                    | Y                             | 100%          | 100%                          | 1334      |      | hypothetical protein |
| Mv_NIES-102_05324                                    | Y                             | 100%          | 100%                          | 341       |      | hypothetical protein |
| Mv_NIES-102_05325                                    | Y                             | 100%          | 100%                          | 566       |      | hypothetical protein |
| Mv_NIES-102_05329                                    | Y                             | 100%          | 100%                          | 2570      |      | hypothetical protein |
| Mv_NIES-102_05396                                    | Y                             | 100%          | 100%                          | 380       |      | hypothetical protein |

| Representative gene<br>(Mv_NIES-102 as<br>reference) | Used for core<br>genome tree? | %<br>presence | % intact &<br>single-<br>copy | No.<br>BP | Name | Product                                 |
|------------------------------------------------------|-------------------------------|---------------|-------------------------------|-----------|------|-----------------------------------------|
| Mv_NIES-102_05401                                    | Y                             | 100%          | 100%                          | 566       |      | hypothetical protein                    |
| Mv_NIES-102_05404                                    | Y                             | 100%          | 100%                          | 161       |      | hypothetical protein                    |
| Mv_NIES-102_05405                                    | Y                             | 100%          | 100%                          | 164       |      | hypothetical protein                    |
| Mv_NIES-102_05406                                    | Y                             | 100%          | 100%                          | 455       |      | hypothetical protein                    |
| Mv_NIES-102_05408                                    | Y                             | 100%          | 100%                          | 1049      |      | hypothetical protein                    |
| Mv_NIES-102_05414                                    | Y                             | 100%          | 100%                          | 1181      |      | hypothetical protein                    |
| Mv_NIES-102_05415                                    | Y                             | 100%          | 100%                          | 266       |      | hypothetical protein                    |
| Mv_NIES-102_05416                                    | Y                             | 100%          | 100%                          | 239       |      | hypothetical protein                    |
| Mv_NIES-102_05425                                    | Y                             | 100%          | 100%                          | 377       |      | hypothetical protein                    |
| Mv_NIES-102_05439                                    | Y                             | 100%          | 100%                          | 515       |      | hypothetical protein                    |
| Mv_NIES-102_05471                                    | Y                             | 100%          | 100%                          | 407       |      | hypothetical protein                    |
| Mv_NIES-102_05474                                    | Y                             | 100%          | 100%                          | 821       |      | hypothetical protein                    |
| Mv_NIES-102_05481                                    | Y                             | 100%          | 100%                          | 284       |      | hypothetical protein                    |
| Mv_NIES-102_05505                                    | Y                             | 100%          | 100%                          | 1163      |      | hypothetical protein                    |
| Mv_NIES-102_05507                                    | Y                             | 100%          | 100%                          | 1043      |      | hypothetical protein                    |
| Mv_NIES-102_05512                                    | Y                             | 100%          | 100%                          | 1001      |      | hypothetical protein                    |
| Mv_NIES-102_05521                                    | Y                             | 100%          | 100%                          | 1064      |      | hypothetical protein                    |
| Mv_NIES-102_05522                                    | Y                             | 100%          | 100%                          | 857       |      | hypothetical protein                    |
| Mv_NIES-102_05529                                    | Y                             | 100%          | 100%                          | 323       |      | hypothetical protein                    |
| Mv_NIES-102_05530                                    | Y                             | 100%          | 100%                          | 611       |      | hypothetical protein                    |
| Mv_NIES-102_05588                                    | Y                             | 100%          | 100%                          | 620       |      | hypothetical protein                    |
| Mv_NIES-102_05589                                    | Y                             | 100%          | 100%                          | 1526      |      | hypothetical protein                    |
| Mv_NIES-102_05590                                    | Y                             | 100%          | 100%                          | 830       |      | hypothetical protein                    |
| Mv_NIES-102_05592                                    | Y                             | 100%          | 100%                          | 980       |      | hypothetical protein                    |
| Mv_NIES-102_05613                                    | Y                             | 100%          | 100%                          | 1829      |      | hypothetical protein                    |
| Mv_NIES-102_05662                                    | Y                             | 100%          | 100%                          | 1130      |      | hypothetical protein                    |
| Mv_NIES-102_05664                                    | Y                             | 100%          | 100%                          | 686       |      | hypothetical protein                    |
| Mv_NIES-102_05674                                    | Y                             | 100%          | 100%                          | 320       |      | hypothetical protein                    |
| Mv_NIES-102_05682                                    | Y                             | 100%          | 100%                          | 497       |      | hypothetical protein                    |
| Mv_NIES-102_05686                                    | Y                             | 100%          | 100%                          | 1964      |      | hypothetical protein                    |
| Mv_NIES-102_05687                                    | Y                             | 100%          | 100%                          | 641       |      | hypothetical protein                    |
| Mv_NIES-102_05688                                    | Y                             | 100%          | 100%                          | 446       |      | hypothetical protein                    |
| Mv_NIES-102_05690                                    | Y                             | 100%          | 100%                          | 683       |      | hypothetical protein                    |
| Mv_NIES-102_05691                                    | Y                             | 100%          | 100%                          | 599       |      | hypothetical protein                    |
| Mv_NIES-102_05692                                    | Y                             | 100%          | 100%                          | 818       |      | hypothetical protein                    |
| Mv_NIES-102_05693                                    | Y                             | 100%          | 100%                          | 806       |      | hypothetical protein                    |
| Mv_NIES-102_05712                                    | Y                             | 100%          | 100%                          | 191       |      | hypothetical protein                    |
| Mv_NIES-102_05713                                    | Y                             | 100%          | 100%                          | 1076      |      | hypothetical protein                    |
| Mv_NIES-102_05729                                    | Y                             | 100%          | 100%                          | 641       |      | hypothetical protein                    |
| Mv_NIES-102_00031                                    | Y                             | 100%          | 100%                          | 476       |      | Inorganic triphosphatase                |
| Mv_NIES-102_04064                                    | Y                             | 100%          | 100%                          | 650       |      | Iron-sulfur cluster carrier protein     |
| Mv_NIES-102_05252                                    | Y                             | 100%          | 100%                          | 944       |      | Isoaspartyl peptidase/L-asparaginase    |
| Mv_NIES-102_05506                                    | Y                             | 100%          | 100%                          | 1043      |      | L-Ala-D/L-Glu epimerase                 |
| Mv_NIES-102_03923                                    | Y                             | 100%          | 100%                          | 170       |      | Metallothionein                         |
| Mv_NIES-102_04424                                    | Y                             | 100%          | 100%                          | 1391      |      | NAD-dependent malic enzyme              |
| Mv_NIES-102_00129                                    | Y                             | 100%          | 100%                          | 587       |      | Nucleoside triphosphate pyrophosphatase |
| Mv_NIES-102_05437                                    | Y                             | 100%          | 100%                          | 962       |      | Orange carotenoid-binding protein       |
| Mv_NIES-102_00041                                    | Y                             | 100%          | 100%                          | 500       |      | Pentapeptide repeat protein Rfr32       |
| Mv_NIES-102_03895                                    | Y                             | 100%          | 100%                          | 509       |      | Pentapeptide repeat protein Rfr32       |



| Representative gene<br>(Mv_NIES-102 as<br>reference) | Used for core<br>genome tree? | %<br>presence | % intact &<br>single-<br>copy | No.<br>BP | Name | Product                                                           |
|------------------------------------------------------|-------------------------------|---------------|-------------------------------|-----------|------|-------------------------------------------------------------------|
| Mv_NIES-102_04960                                    | Y                             | 100%          | 100%                          | 485       |      | Pentapeptide repeat protein Rfr32                                 |
| Mv_NIES-102_01204                                    | Y                             | 100%          | 100%                          | 635       |      | Peroxiredoxin                                                     |
| Mv_NIES-102_05112                                    | Y                             | 100%          | 100%                          | 542       |      | Peroxiredoxin                                                     |
| Mv_NIES-102_01853                                    | Y                             | 100%          | 100%                          | 956       |      | PhoH-like protein                                                 |
| Mv_NIES-102_00051                                    | Y                             | 100%          | 100%                          | 401       |      | Photosystem II lipoprotein Psb27                                  |
| Mv_NIES-102_02820                                    | Y                             | 100%          | 100%                          | 338       |      | Photosystem II reaction center Psb28 protein                      |
| Mv_NIES-102_03612                                    | Y                             | 100%          | 100%                          | 1493      |      | Polyphosphate:AMP phosphotransferase                              |
| Mv_NIES-102_00002                                    | Y                             | 100%          | 100%                          | 950       |      | Protoheme IX farnesyltransferase                                  |
| Mv_NIES-102_05032                                    | Y                             | 100%          | 100%                          | 1814      |      | putative ABC transporter ATP-binding protein                      |
| Mv_NIES-102_04187                                    | Y                             | 100%          | 100%                          | 1742      |      | putative ABC transporter-binding protein                          |
| Mv_NIES-102_05775                                    | Y                             | 100%          | 100%                          | 1385      |      | Putative cytochrome P450 135A1                                    |
| Mv_NIES-102_05696                                    | Y                             | 100%          | 100%                          | 860       |      | putative ketoamine kinase                                         |
| Mv_NIES-102_03696                                    | Y                             | 100%          | 100%                          | 518       |      | Putative low molecular weight protein-tyrosine-phosphatase        |
| Mv_NIES-102_00710                                    | Y                             | 100%          | 100%                          | 1727      |      | Putative multidrug export ATP-binding/permease protein            |
| Mv_NIES-102_05171                                    | Y                             | 100%          | 100%                          | 953       |      | putative oxidoreductase                                           |
| Mv_NIES-102_00615                                    | Y                             | 100%          | 100%                          | 887       |      | putative protein                                                  |
| Mv_NIES-102_00959                                    | Y                             | 100%          | 100%                          | 899       |      | putative protein                                                  |
| Mv_NIES-102_03759                                    | Y                             | 100%          | 100%                          | 323       |      | putative protein                                                  |
| Mv_NIES-102_04261                                    | Y                             | 100%          | 100%                          | 1859      |      | putative protein                                                  |
| Mv_NIES-102_04626                                    | Y                             | 100%          | 100%                          | 1562      |      | putative protein                                                  |
| Mv_NIES-102_03286                                    | Y                             | 100%          | 100%                          | 1337      |      | putative transporter                                              |
| Mv_NIES-102_05427                                    | Y                             | 100%          | 100%                          | 965       |      | Putative two-component membrane permease complex subunit SMU_747c |
| Mv_NIES-102_02338                                    | Y                             | 100%          | 100%                          | 488       |      | Putative universal stress protein                                 |
| Mv_NIES-102_03937                                    | Y                             | 100%          | 100%                          | 1556      |      | putative zinc protease                                            |
| Mv_NIES-102_05614                                    | Y                             | 100%          | 100%                          | 1277      |      | putative zinc protease                                            |
| Mv_NIES-102_05699                                    | Y                             | 100%          | 100%                          | 1211      |      | putative zinc protease                                            |
| Mv_NIES-102_02958                                    | Y                             | 100%          | 100%                          | 659       |      | Pyridoxal phosphate homeostasis protein                           |
| Mv_NIES-102_00110                                    | Y                             | 100%          | 100%                          | 944       |      | Renalase                                                          |
| Mv_NIES-102_01325                                    | Y                             | 100%          | 100%                          | 980       |      | S-adenosylmethionine/S-adenosylhomocysteine transporter           |
| Mv_NIES-102_04328                                    | Y                             | 100%          | 100%                          | 317       |      | Thioredoxin-like protein                                          |
| Mv_NIES-102_00100                                    | Y                             | 100%          | 100%                          | 311       |      | Ycf54-like protein                                                |

**Table S3.**

**ANI and dDDH basis for genospecies determination.** Number of monophyletic clusters in both core and pan gene phylogenies (see Fig. 2), number of genomes (strains) in each cluster, and the minimum within cluster and maximum between cluster ANI and dDDH values for each group. Minimum OGRI thresholds were chosen as the lowest value observed across all clusters with three or more genomes. Clusters with acceptable OGRI values (i.e., minimum within cluster ANI and dDDH values  $\geq 0.970$  and  $0.750$ , respectively, and maximum between cluster values  $< 0.970$  and  $0.750$ , respectively) are indicated in **bold** and labeled as putative genospecies.

| Cluster   | No. of Genomes | ANI                    |                         | dDDH                   |                         | Genospecies |
|-----------|----------------|------------------------|-------------------------|------------------------|-------------------------|-------------|
|           |                | Minimum within cluster | Maximum between cluster | Minimum within cluster | Maximum between cluster |             |
| <b>1</b>  | <b>2</b>       | <b>0.983</b>           | <b>0.956</b>            | <b>0.865</b>           | <b>0.652</b>            | <b>A</b>    |
| <b>2</b>  | <b>4</b>       | <b>0.990</b>           | <b>0.969</b>            | <b>0.929</b>           | <b>0.668</b>            | <b>B</b>    |
| <b>3</b>  | <b>4</b>       | <b>0.998</b>           | <b>0.958</b>            | <b>0.990</b>           | <b>0.659</b>            | <b>C</b>    |
| <b>4</b>  | <b>3</b>       | <b>0.986</b>           | <b>0.969</b>            | <b>0.881</b>           | <b>0.740</b>            | <b>D</b>    |
| 5         | 3              | 0.970                  | 0.970                   | 0.753                  | 0.740                   |             |
| <b>6</b>  | <b>2</b>       | <b>0.981</b>           | <b>0.958</b>            | <b>0.835</b>           | <b>0.656</b>            | <b>E</b>    |
| 7         | 2              | 0.963                  | 0.963                   | 0.703                  | 0.702                   |             |
| 8         | 2              | 0.966                  | 0.964                   | 0.720                  | 0.703                   |             |
| <b>9</b>  | <b>3</b>       | <b>0.989</b>           | <b>0.969</b>            | <b>0.913</b>           | <b>0.746</b>            | <b>F</b>    |
| <b>10</b> | <b>16</b>      | <b>0.971</b>           | <b>0.969</b>            | <b>0.758</b>           | <b>0.746</b>            | <b>G</b>    |
| <b>11</b> | <b>5</b>       | <b>0.970</b>           | <b>0.960</b>            | <b>0.753</b>           | <b>0.673</b>            | <b>H</b>    |
| <b>12</b> | <b>3</b>       | <b>0.988</b>           | <b>0.961</b>            | <b>0.894</b>           | <b>0.673</b>            | <b>I</b>    |
| <b>13</b> | <b>3</b>       | <b>0.979</b>           | <b>0.961</b>            | <b>0.814</b>           | <b>0.670</b>            | <b>J</b>    |
| <b>14</b> | <b>6</b>       | <b>0.988</b>           | <b>0.959</b>            | <b>0.898</b>           | <b>0.669</b>            | <b>K</b>    |
| <b>15</b> | <b>2</b>       | <b>0.972</b>           | <b>0.963</b>            | <b>0.766</b>           | <b>0.681</b>            | <b>L</b>    |
| <b>16</b> | <b>4</b>       | <b>0.984</b>           | <b>0.964</b>            | <b>0.864</b>           | <b>0.700</b>            | <b>M</b>    |
| <b>17</b> | <b>6</b>       | <b>0.971</b>           | <b>0.964</b>            | <b>0.750</b>           | <b>0.702</b>            | <b>N</b>    |
| 18        | 3              | 0.983                  | 0.971                   | 0.859                  | 0.753                   |             |
| 19        | 2              | 0.986                  | 0.973                   | 0.875                  | 0.765                   |             |
| 20        | 2              | 0.974                  | 0.973                   | 0.771                  | 0.769                   |             |
| 21        | 5              | 0.972                  | 0.973                   | 0.772                  | 0.769                   |             |
| <b>22</b> | <b>2</b>       | <b>0.988</b>           | <b>0.969</b>            | <b>0.905</b>           | <b>0.736</b>            | <b>O</b>    |
| <b>23</b> | <b>29</b>      | <b>0.971</b>           | <b>0.962</b>            | <b>0.770</b>           | <b>0.680</b>            | <b>P</b>    |

**Table S4.**

**Sequence similarity matrix of 16S rRNA genes extracted from *Microcystis* genomes (begin next page).** Pairwise comparisons of sequence similarities for the 61 full length 16S sequences identified in the set of 122 genomes. Each sequence was compared to all others in the dataset using MUSCLE alignment tool built-in MEGA (44). The lowest pairwise sequence similarity across the entire set of 1,653 comparisons was 0.9931.

| Genome ID              | Ma_1130S32 | Ma_BLCCF108 | Ma_BLCCF158 | Ma_FD4     | Ma_KLA2    | Ma_KWA     | Ma_L211_11 |
|------------------------|------------|-------------|-------------|------------|------------|------------|------------|
| Ma_1130S32             |            |             |             |            |            |            |            |
| Ma_BLCCF108            | 0.99662166 |             |             |            |            |            |            |
| Ma_BLCCF158            | 0.99593918 | 0.99797373  |             |            |            |            |            |
| Ma_FD4                 | 0.99932553 | 0.99730003  | 0.99661937  |            |            |            |            |
| Ma_KLA2                | 0.9966174  | 0.99729743  | 0.99661611  | 0.99729663 |            |            |            |
| Ma_KWA                 | 0.99662066 | 0.99458883  | 0.99390219  | 0.99729923 | 0.99458199 |            |            |
| Ma_L211_11             | 0.99729833 | 0.99526838  | 0.99458335  | 0.99797577 | 0.99526242 | 0.99932576 |            |
| Ma_LEGE11464           | 0.99389658 | 0.99458179  | 0.99389425  | 0.99458018 | 0.99457494 | 0.99593816 | 0.99525802 |
| Ma_LEGE91341           | 0.99594448 | 0.99932596  | 0.9972973   | 0.99662378 | 0.99662053 | 0.99391017 | 0.99459043 |
| Ma_LG11_05             | 0.9979745  | 0.99865141  | 0.99662037  | 0.99865101 | 0.99729743 | 0.99594463 | 0.99662278 |
| Ma_MB_S_20031200_S102D | 0.99661953 | 0.99729913  | 0.99661824  | 0.99729833 | 0.99729573 | 0.99458541 | 0.9952654  |
| Ma_NIES_1211           | 0.99594448 | 0.99797637  | 0.99594294  | 0.99662378 | 0.99662053 | 0.99662178 | 0.99729923 |
| Ma_NIES_2481           | 0.99662166 | 0.99730082  | 0.99662037  | 0.99730003 | 0.99729743 | 0.99729843 | 0.99797517 |
| Ma_NIES_2519           | 0.99594448 | 0.99797637  | 0.99594294  | 0.99662378 | 0.99662053 | 0.99662178 | 0.99729923 |
| Ma_NIES_2520           | 0.99797322 | 0.99594328  | 0.99525921  | 0.99865017 | 0.99593816 | 0.99729833 | 0.9979751  |
| Ma_NIES_2521           | 0.99662166 | 1           | 0.99797373  | 0.99730003 | 0.99729743 | 0.99458883 | 0.99526838 |
| Ma_NIES_2522           | 0.9952654  | 0.99730003  | 0.9952636   | 0.99594583 | 0.99594193 | 0.99594343 | 0.99662178 |
| Ma_NIES_2549           | 0.99662166 | 0.99730082  | 0.99662037  | 0.99730003 | 0.99729743 | 0.99729843 | 0.99797517 |
| Ma_NIES_298            | 0.9979745  | 0.99865141  | 0.99797373  | 0.99865101 | 0.99864972 | 0.99594463 | 0.99662278 |
| Ma_NIES_3787           | 0.99594193 | 0.99662266  | 0.99594038  | 0.99662166 | 0.9966184  | 0.99661965 | 0.99729753 |
| Ma_NIES_3804           | 0.99526382 | 0.99729913  | 0.99526202  | 0.99594448 | 0.99594057 | 0.99594208 | 0.99662066 |
| Ma_NIES_3806           | 0.99662166 | 0.99730082  | 0.99662037  | 0.99730003 | 0.99729743 | 0.99729843 | 0.99797517 |
| Ma_NIES_3807           | 0.99662166 | 0.99730082  | 0.99662037  | 0.99730003 | 0.99729743 | 0.99729843 | 0.99797517 |
| Ma_NIES_4264           | 0.99662166 | 0.99730082  | 0.99662037  | 0.99730003 | 0.99729743 | 0.99729843 | 0.99797517 |
| Ma_NIES_4285           | 0.99729663 | 0.9979751   | 0.9972956   | 0.9979745  | 0.99932553 | 0.995264   | 0.99594328 |
| Ma_NIES_4325           | 0.99526101 | 0.99594328  | 0.99797654  | 0.99594208 | 0.9966174  | 0.9932227  | 0.99390451 |
| Ma_NIES_44             | 0.99594448 | 0.99797637  | 0.9972973   | 0.99662378 | 0.99662053 | 0.99662178 | 0.99729923 |
| Ma_NIES_843            | 0.99865057 | 0.99797577  | 0.99594174  | 0.99932596 | 0.99661953 | 0.99662278 | 0.99730003 |
| Ma_NIES_87             | 0.99458179 | 0.99526523  | 0.99457973  | 0.99526382 | 0.99525925 | 0.99526101 | 0.99594072 |
| Ma_NIES_88             | 0.99932553 | 0.99730003  | 0.99661937  | 1          | 0.99729663 | 0.99729923 | 0.99797577 |
| Ma_PCC7005             | 0.99661853 | 0.99729833  | 0.99661724  | 0.99729753 | 0.99865017 | 0.99594328 | 0.995264   |
| Ma_PCC7806SL           | 0.99729833 | 0.99932596  | 0.99864965  | 0.99797577 | 0.99797382 | 0.99526698 | 0.99594583 |
| Ma_PCC7941             | 0.9979745  | 0.99865141  | 0.99797373  | 0.99865101 | 0.99864972 | 0.99594463 | 0.99662278 |
| Ma_PCC9432             | 0.99729663 | 0.9979751   | 0.9972956   | 0.9979745  | 0.99797255 | 0.995264   | 0.99594328 |
| Ma_PCC9443             | 0.995264   | 0.99865061  | 0.99661837  | 0.99594463 | 0.99594072 | 0.99322698 | 0.99390836 |
| Ma_PCC9701             | 0.99729913 | 0.99662378  | 0.99594174  | 0.99797637 | 0.99661953 | 0.99797517 | 0.99865101 |
| Ma_PCC9717             | 0.99662166 | 1           | 0.99797373  | 0.99730003 | 0.99729743 | 0.99458883 | 0.99526838 |
| Ma_PCC9806             | 0.9952668  | 0.99730082  | 0.99526501  | 0.99594703 | 0.99594313 | 0.99594463 | 0.99662278 |
| Ma_PCC9807             | 0.9979745  | 0.99865141  | 0.99662037  | 0.99865101 | 0.99729743 | 0.99594463 | 0.99662278 |
| Ma_PCC9808             | 0.99729833 | 0.99932596  | 0.99864965  | 0.99797577 | 0.99797382 | 0.99526698 | 0.99594583 |
| Ma_PCC9809             | 0.99729833 | 0.99526838  | 0.99458335  | 0.99797577 | 0.99526242 | 0.99932576 | 1          |
| Ma_QC_Ch_20071001_M135 | 0.99797322 | 0.99594328  | 0.99525921  | 0.99865017 | 0.99593816 | 0.99729833 | 0.9979751  |
| Ma_SC_T_19800800_S464  | 0.9979745  | 0.99865141  | 0.99797373  | 0.99865101 | 0.99864972 | 0.99594463 | 0.99662278 |
| Ma_Sj                  | 0.99729663 | 0.9979751   | 0.9972956   | 0.9979745  | 0.99932553 | 0.995264   | 0.99594328 |
| Ma_TAIHU98             | 0.99594193 | 0.99662266  | 0.99594038  | 0.99662166 | 0.9966184  | 0.99661965 | 0.99729753 |
| Mf_FACHB_1344          | 0.9979745  | 0.99729923  | 0.99661837  | 0.99865101 | 0.99729583 | 0.99730003 | 0.99797637 |
| Mf_QC_C_20070823_S20D  | 0.99729913 | 0.99662378  | 0.99594174  | 0.99797637 | 0.99661953 | 0.99797517 | 0.99865101 |
| Mf_WU_F_19750830_S460  | 0.9952668  | 0.99730082  | 0.99526501  | 0.99594703 | 0.99594313 | 0.99594463 | 0.99662278 |
| Mn_MB_F_20050700_S1D   | 0.99594448 | 0.99932596  | 0.9972973   | 0.99662378 | 0.99662053 | 0.99391017 | 0.99459043 |
| Mp_FACHB_1757          | 0.99729833 | 0.99932596  | 0.99864965  | 0.99797577 | 0.99797382 | 0.99526698 | 0.99594583 |
| Mp_MB_F_20051200_S9D   | 0.99729663 | 0.9979751   | 0.9972956   | 0.9979745  | 0.99932553 | 0.995264   | 0.99594328 |
| Msp_0824               | 0.99729913 | 0.99932576  | 0.9972965   | 0.99797637 | 0.99661953 | 0.99526838 | 0.99594703 |
| Msp_LEGE00066          | 0.99729833 | 0.99797637  | 0.9972973   | 0.99797577 | 0.99662053 | 0.99662178 | 0.99729923 |
| Msp_MC19               | 0.98768159 | 0.98975588  | 0.98767686  | 0.98837776 | 0.9883664  | 0.98768207 | 0.98837427 |
| Msp_OC_L_20101000_S702 | 0.99729663 | 0.9979751   | 0.9972956   | 0.9979745  | 0.99932553 | 0.995264   | 0.99594328 |
| Msp_TI_4               | 0.99594448 | 0.99797637  | 0.99594294  | 0.99662378 | 0.99662053 | 0.99662178 | 0.99729923 |
| Mv_FACHB_1342          | 0.99729833 | 0.99797637  | 0.9972973   | 0.99797577 | 0.99662053 | 0.99662178 | 0.99729923 |
| Mv_NIES_102            | 0.99729833 | 0.99526838  | 0.99458335  | 0.99797577 | 0.99526242 | 0.99932576 | 1          |
| Mw_FACHB_1317          | 0.99729753 | 0.99797577  | 0.99594174  | 0.99797517 | 0.99661953 | 0.99662278 | 0.99594463 |
| Mw_FACHB_1339          | 0.99594448 | 0.99797637  | 0.9972973   | 0.99662378 | 0.99662053 | 0.99662178 | 0.99729923 |
| Mw_MB_S_20031200_S109D | 0.99458702 | 0.99797577  | 0.99594174  | 0.99526838 | 0.99526382 | 0.99526558 | 0.99594463 |

| Genome ID              | Ma LEGE11464 | Ma LEGE91341 | Ma LG11_05 | Ma MB S 20031200 S102D | Ma NIES 1211 | Ma NIES 2481 | Ma NIES 2519 |
|------------------------|--------------|--------------|------------|------------------------|--------------|--------------|--------------|
| Ma_1130S32             |              |              |            |                        |              |              |              |
| Ma_BLCCF108            |              |              |            |                        |              |              |              |
| Ma_BLCCF158            |              |              |            |                        |              |              |              |
| Ma_FD4                 |              |              |            |                        |              |              |              |
| Ma_KLA2                |              |              |            |                        |              |              |              |
| Ma_KWA                 |              |              |            |                        |              |              |              |
| Ma_L211_11             |              |              |            |                        |              |              |              |
| Ma_LEGE11464           |              |              |            |                        |              |              |              |
| Ma_LEGE91341           | 0.99390225   |              |            |                        |              |              |              |
| Ma_LG11_05             | 0.99458179   | 0.99797637   |            |                        |              |              |              |
| Ma_MB_S_20031200_S102D | 0.99457837   | 0.99662266   | 0.99729913 |                        |              |              |              |
| Ma_NIES_1211           | 0.9966174    | 0.99730082   | 0.99797637 | 0.99662266             |              |              |              |
| Ma_NIES_2481           | 0.99729493   | 0.99662478   | 0.99730082 | 0.99729913             | 0.99932596   |              |              |
| Ma_NIES_2519           | 0.9966174    | 0.99730082   | 0.99797637 | 0.99662266             | 1            | 0.99932596   |              |
| Ma_NIES_2520           | 0.99390247   | 0.9952654    | 0.99729753 | 0.99594072             | 0.9952654    | 0.99594328   | 0.9952654    |
| Ma_NIES_2521           | 0.99458179   | 0.99932596   | 0.99865141 | 0.99729913             | 0.99797637   | 0.99730082   | 0.99797637   |
| Ma_NIES_2522           | 0.99593816   | 0.99662378   | 0.99730003 | 0.99594448             | 0.99932576   | 0.99865101   | 0.99932576   |
| Ma_NIES_2549           | 0.99729493   | 0.99662478   | 0.99730082 | 0.99729913             | 0.99932596   | 1            | 0.99932596   |
| Ma_NIES_298            | 0.99593937   | 0.99797637   | 0.99865141 | 0.99865057             | 0.99797637   | 0.99865141   | 0.99797637   |
| Ma_NIES_3787           | 0.99797322   | 0.99594568   | 0.99662266 | 0.99662053             | 0.99865057   | 0.99932553   | 0.99865057   |
| Ma_NIES_3804           | 0.99729663   | 0.99729663   | 0.99729913 | 0.99594313             | 0.99932553   | 0.99865057   | 0.99932553   |
| Ma_NIES_3806           | 0.99729493   | 0.99662478   | 0.99730082 | 0.99729913             | 0.99932596   | 1            | 0.99932596   |
| Ma_NIES_3807           | 0.99729493   | 0.99662478   | 0.99730082 | 0.99729913             | 0.99932596   | 1            | 0.99932596   |
| Ma_NIES_4264           | 0.99729493   | 0.99662478   | 0.99730082 | 0.99729913             | 0.99932596   | 1            | 0.99932596   |
| Ma_NIES_4285           | 0.99525784   | 0.99729913   | 0.9979751  | 0.99797382             | 0.99729913   | 0.9979751    | 0.99729913   |
| Ma_NIES_4325           | 0.99321387   | 0.9952654    | 0.99594328 | 0.99594072             | 0.9952654    | 0.99594328   | 0.9952654    |
| Ma_NIES_44             | 0.9966174    | 0.99730082   | 0.99662478 | 0.99662266             | 0.99865141   | 0.99932596   | 0.99865141   |
| Ma_NIES_843            | 0.99390043   | 0.99730003   | 0.99932576 | 0.99662166             | 0.99730003   | 0.99662378   | 0.99730003   |
| Ma_NIES_87             | 0.9979745    | 0.99458682   | 0.99526523 | 0.99526224             | 0.99729743   | 0.99797382   | 0.99729743   |
| Ma_NIES_88             | 0.99458018   | 0.99662378   | 0.99865101 | 0.99729833             | 0.99662378   | 0.99730003   | 0.99662378   |
| Ma_PCC7005             | 0.99593801   | 0.99662166   | 0.99729833 | 0.99729663             | 0.99662166   | 0.99729833   | 0.99662166   |
| Ma_PCC7806SL           | 0.99526083   | 0.99865141   | 0.99797637 | 0.9979751              | 0.99730082   | 0.99797637   | 0.99730082   |
| Ma_PCC7941             | 0.99593937   | 0.99797637   | 0.99865141 | 0.99865057             | 0.99797637   | 0.99865141   | 0.99797637   |
| Ma_PCC9432             | 0.99661953   | 0.99729913   | 0.9979751  | 0.99797382             | 0.99729913   | 0.9979751    | 0.99729913   |
| Ma_PCC9443             | 0.99390043   | 0.99797517   | 0.99729923 | 0.99594328             | 0.99662278   | 0.99594583   | 0.99662278   |
| Ma_PCC9701             | 0.9966164    | 0.99594703   | 0.99662378 | 0.99662166             | 0.99865101   | 0.99932576   | 0.99865101   |
| Ma_PCC9717             | 0.99458179   | 0.99932596   | 0.99865141 | 0.99729913             | 0.99797637   | 0.99730082   | 0.99797637   |
| Ma_PCC9806             | 0.99593937   | 0.99662478   | 0.99730082 | 0.99594568             | 0.99932596   | 0.99865141   | 0.99932596   |
| Ma_PCC9807             | 0.99458179   | 0.99797637   | 1          | 0.99729913             | 0.99797637   | 0.99730082   | 0.99797637   |
| Ma_PCC9808             | 0.99526083   | 0.99865141   | 0.99797637 | 0.9979751              | 0.99730082   | 0.99797637   | 0.99730082   |
| Ma_PCC9809             | 0.99525802   | 0.99459043   | 0.99662278 | 0.9952654              | 0.99729923   | 0.99797517   | 0.99729923   |
| Ma_QC_Ch_20071001_M135 | 0.99458199   | 0.9952654    | 0.99729753 | 0.99594072             | 0.9952654    | 0.99594328   | 0.9952654    |
| Ma_SC_T_19800800_S464  | 0.99593937   | 0.99797637   | 0.99865141 | 0.99865057             | 0.99797637   | 0.99865141   | 0.99797637   |
| Ma_Sj                  | 0.99525784   | 0.99729913   | 0.9979751  | 0.99797382             | 0.99729913   | 0.9979751    | 0.99729913   |
| Ma_TAIHU98             | 0.99797322   | 0.99594568   | 0.99662266 | 0.99662053             | 0.99865057   | 0.99932553   | 0.99865057   |
| Mf_FACHB_1344          | 0.99457857   | 0.99662278   | 0.99729923 | 0.99729753             | 0.99662278   | 0.99729923   | 0.99662278   |
| Mf_QC_C_20070823_S20D  | 0.9966164    | 0.99594703   | 0.99662378 | 0.99662166             | 0.99865101   | 0.99932576   | 0.99865101   |
| Mf_WU_F_19750830_S460  | 0.99593937   | 0.99662478   | 0.99730082 | 0.99594568             | 0.99932596   | 0.99865141   | 0.99932596   |
| Mn_MB_F_20050700_S1D   | 0.99390225   | 0.99865141   | 0.99797637 | 0.99662266             | 0.99730082   | 0.99662478   | 0.99730082   |
| Mp_FACHB_1757          | 0.99526083   | 0.99865141   | 0.99797637 | 0.9979751              | 0.99730082   | 0.99797637   | 0.99730082   |
| Mp_MB_F_20051200_S9D   | 0.99525784   | 0.99729913   | 0.9979751  | 0.99797382             | 0.99729913   | 0.9979751    | 0.99729913   |
| Msp_0824               | 0.99390043   | 0.99865101   | 0.99797577 | 0.99662166             | 0.99730003   | 0.99662378   | 0.99730003   |
| Msp_LEGE00066          | 0.99526083   | 0.99730082   | 0.99797637 | 0.99662266             | 0.99730082   | 0.99797637   | 0.99730082   |
| Msp_MC19               | 0.98766582   | 0.98906882   | 0.98975588 | 0.98837383             | 0.99112844   | 0.99044242   | 0.99112844   |
| Msp_OC_L_20101000_S702 | 0.99525784   | 0.99729913   | 0.9979751  | 0.99797382             | 0.99729913   | 0.9979751    | 0.99729913   |
| Msp_TI_4               | 0.9966174    | 0.99730082   | 0.99797637 | 0.99662266             | 1            | 0.99932596   | 1            |
| Mv_FACHB_1342          | 0.99526083   | 0.99730082   | 0.99797637 | 0.99662266             | 0.99730082   | 0.99797637   | 0.99730082   |
| Mv_NIES_102            | 0.99525802   | 0.99459043   | 0.99662278 | 0.9952654              | 0.99729923   | 0.99797517   | 0.99729923   |
| Mw_FACHB_1317          | 0.99526224   | 0.99730003   | 0.99932576 | 0.99662166             | 0.99730003   | 0.99662378   | 0.99730003   |
| Mw_FACHB_1339          | 0.9966174    | 0.99730082   | 0.99662478 | 0.99662266             | 0.99865141   | 0.99932596   | 0.99865141   |
| Mw_MB_S_20031200_S109D | 0.99525943   | 0.99730003   | 0.99662378 | 0.9952668              | 0.99865101   | 0.99797577   | 0.99865101   |

| Genome ID              | Ma NIES 2520 | Ma NIES 2521 | Ma NIES 2522 | Ma NIES 2549 | Ma NIES 298 | Ma NIES 3787 | Ma NIES 3804 |
|------------------------|--------------|--------------|--------------|--------------|-------------|--------------|--------------|
| Ma_1130S32             |              |              |              |              |             |              |              |
| Ma_BLCCF108            |              |              |              |              |             |              |              |
| Ma_BLCCF158            |              |              |              |              |             |              |              |
| Ma_FD4                 |              |              |              |              |             |              |              |
| Ma_KLA2                |              |              |              |              |             |              |              |
| Ma_KWA                 |              |              |              |              |             |              |              |
| Ma_L211_11             |              |              |              |              |             |              |              |
| Ma_LEGE11464           |              |              |              |              |             |              |              |
| Ma_LEGE91341           |              |              |              |              |             |              |              |
| Ma_LG11_05             |              |              |              |              |             |              |              |
| Ma_MB_S_20031200_S102D |              |              |              |              |             |              |              |
| Ma_NIES_1211           |              |              |              |              |             |              |              |
| Ma_NIES_2481           |              |              |              |              |             |              |              |
| Ma_NIES_2519           |              |              |              |              |             |              |              |
| Ma_NIES_2520           |              |              |              |              |             |              |              |
| Ma_NIES_2521           | 0.99594328   |              |              |              |             |              |              |
| Ma_NIES_2522           | 0.99458541   | 0.99730003   |              |              |             |              |              |
| Ma_NIES_2549           | 0.99594328   | 0.99730082   | 0.99865101   |              |             |              |              |
| Ma_NIES_298            | 0.99729753   | 0.99865141   | 0.99730003   | 0.99865141   |             |              |              |
| Ma_NIES_3787           | 0.99594583   | 0.99662266   | 0.9979745    | 0.99932553   | 0.9979751   |              |              |
| Ma_NIES_3804           | 0.9945836    | 0.99729913   | 0.99865017   | 0.99865057   | 0.99729913  | 0.99797382   |              |
| Ma_NIES_3806           | 0.99594328   | 0.99730082   | 0.99865101   | 1            | 0.99865141  | 0.99932553   | 0.99865057   |
| Ma_NIES_3807           | 0.99594328   | 0.99730082   | 0.99865101   | 1            | 0.99865141  | 0.99932553   | 0.99865057   |
| Ma_NIES_4264           | 0.99594328   | 0.99730082   | 0.99865101   | 1            | 0.99865141  | 0.99932553   | 0.99865057   |
| Ma_NIES_4285           | 0.99661853   | 0.9979751    | 0.99662166   | 0.9979751    | 0.99932553  | 0.99729743   | 0.99662053   |
| Ma_NIES_4325           | 0.99458038   | 0.99594328   | 0.99458541   | 0.99594328   | 0.99729753  | 0.99526242   | 0.9945836    |
| Ma_NIES_44             | 0.9952654    | 0.99797637   | 0.99797577   | 0.99932596   | 0.99797637  | 0.99865057   | 0.9979751    |
| Ma_NIES_843            | 0.9979745    | 0.99797577   | 0.99662278   | 0.99662378   | 0.99797577  | 0.99594448   | 0.99662166   |
| Ma_NIES_87             | 0.99458702   | 0.99526523   | 0.99661953   | 0.99797382   | 0.99662053  | 0.99865057   | 0.9979751    |
| Ma_NIES_88             | 0.99865017   | 0.99730003   | 0.99594583   | 0.99730003   | 0.99865101  | 0.99662166   | 0.99594448   |
| Ma_PCC7005             | 0.99593952   | 0.99729833   | 0.99594328   | 0.99729833   | 0.99865017  | 0.99661953   | 0.99594193   |
| Ma_PCC7806SL           | 0.99662066   | 0.99932596   | 0.99662378   | 0.99797637   | 0.99932596  | 0.99729913   | 0.99662266   |
| Ma_PCC7941             | 0.99729753   | 0.99865141   | 0.99730003   | 0.99865141   | 1           | 0.9979751    | 0.99729913   |
| Ma_PCC9432             | 0.99729923   | 0.9979751    | 0.99662166   | 0.9979751    | 0.99932553  | 0.99865141   | 0.99662053   |
| Ma_PCC9443             | 0.995264     | 0.99865061   | 0.99594463   | 0.99594583   | 0.99729923  | 0.99594448   | 0.99594328   |
| Ma_PCC9701             | 0.99662166   | 0.99662378   | 0.99797517   | 0.99932576   | 0.99797577  | 0.99865017   | 0.9979745    |
| Ma_PCC9717             | 0.99594328   | 1            | 0.99730003   | 0.99730082   | 0.99865141  | 0.99662266   | 0.99729913   |
| Ma_PCC9806             | 0.99458702   | 0.99730082   | 0.99865101   | 0.99865141   | 0.99730082  | 0.9979751    | 0.99865057   |
| Ma_PCC9807             | 0.99729753   | 0.99865141   | 0.99730003   | 0.99730082   | 0.99865141  | 0.99662266   | 0.99729913   |
| Ma_PCC9808             | 0.99662066   | 0.99932596   | 0.99662378   | 0.99797637   | 0.99932596  | 0.99729913   | 0.99662266   |
| Ma_PCC9809             | 0.9979751    | 0.99526838   | 0.99662178   | 0.99797517   | 0.99662278  | 0.99729753   | 0.99662066   |
| Ma_QC_Ch_20071001_M135 | 0.99932596   | 0.99594328   | 0.99458541   | 0.99594328   | 0.99729753  | 0.99662278   | 0.9945836    |
| Ma_SC_T_19800800_S464  | 0.99729753   | 0.99865141   | 0.99730003   | 0.99865141   | 1           | 0.9979751    | 0.99729913   |
| Ma_Sj                  | 0.99661853   | 0.9979751    | 0.99662166   | 0.9979751    | 0.99932553  | 0.99729743   | 0.99662053   |
| Ma_TAIHU98             | 0.99594583   | 0.99662266   | 0.9979745    | 0.99932553   | 0.9979751   | 1            | 0.99797382   |
| Mf_FACHB_1344          | 0.99865057   | 0.99729923   | 0.99594463   | 0.99729923   | 0.99865061  | 0.99662066   | 0.99594328   |
| Mf_QC_C_20070823_S20D  | 0.99662166   | 0.99662378   | 0.99797517   | 0.99932576   | 0.99797577  | 0.99865017   | 0.9979745    |
| Mf_WU_F_19750830_S460  | 0.99458702   | 0.99730082   | 0.99865101   | 0.99865141   | 0.99730082  | 0.9979751    | 0.99865057   |
| Mn_MB_F_20050700_S1D   | 0.9952654    | 0.99932596   | 0.99662378   | 0.99662478   | 0.99797637  | 0.99594568   | 0.99662266   |
| Mp_FACHB_1757          | 0.99662066   | 0.99932596   | 0.99662378   | 0.99797637   | 0.99932596  | 0.99729913   | 0.99662266   |
| Mp_MB_F_20051200_S9D   | 0.99661853   | 0.9979751    | 0.99662166   | 0.9979751    | 0.99932553  | 0.99729743   | 0.99662053   |
| Msp_0824               | 0.99662166   | 0.99932576   | 0.99662278   | 0.99662378   | 0.99797577  | 0.99594448   | 0.99662166   |
| Msp_LEGE00066          | 0.99662066   | 0.99797637   | 0.99662378   | 0.99797637   | 0.99729913  | 0.99729913   | 0.99662266   |
| Msp_MC19               | 0.98698842   | 0.98975588   | 0.99043956   | 0.99044242   | 0.98975588  | 0.98974934   | 0.99043632   |
| Msp_OC_L_20101000_S702 | 0.99661853   | 0.9979751    | 0.99662166   | 0.9979751    | 0.99932553  | 0.99729743   | 0.99662053   |
| Msp_T1_4               | 0.9952654    | 0.99797637   | 0.99932576   | 0.99932596   | 0.99797637  | 0.99865057   | 0.99932553   |
| Mv_FACHB_1342          | 0.99662066   | 0.99797637   | 0.99662378   | 0.99797637   | 0.99797637  | 0.99729913   | 0.99662266   |
| Mv_NIES_102            | 0.9979751    | 0.99526838   | 0.99662178   | 0.99797517   | 0.99662278  | 0.99729753   | 0.99662066   |
| Mw_FACHB_1317          | 0.99661965   | 0.99797577   | 0.99662278   | 0.99662378   | 0.99797577  | 0.99594448   | 0.99662166   |
| Mw_FACHB_1339          | 0.9952654    | 0.99797637   | 0.99797577   | 0.99932596   | 0.99797637  | 0.99865057   | 0.9979751    |
| Mw_MB_S_20031200_S109D | 0.99390632   | 0.99797577   | 0.99797517   | 0.99797577   | 0.99662378  | 0.99729833   | 0.9979745    |

| Genome ID              | Ma_NIES_3806 | Ma_NIES_3807 | Ma_NIES_4264 | Ma_NIES_4285 | Ma_NIES_4325 | Ma_NIES_44 | Ma_NIES_843 |
|------------------------|--------------|--------------|--------------|--------------|--------------|------------|-------------|
| Ma_1130S32             |              |              |              |              |              |            |             |
| Ma_BLCCF108            |              |              |              |              |              |            |             |
| Ma_BLCCF158            |              |              |              |              |              |            |             |
| Ma_FD4                 |              |              |              |              |              |            |             |
| Ma_KLA2                |              |              |              |              |              |            |             |
| Ma_KWA                 |              |              |              |              |              |            |             |
| Ma_L211_11             |              |              |              |              |              |            |             |
| Ma_LEGE11464           |              |              |              |              |              |            |             |
| Ma_LEGE91341           |              |              |              |              |              |            |             |
| Ma_LG11_05             |              |              |              |              |              |            |             |
| Ma_MB_S_20031200_S102D |              |              |              |              |              |            |             |
| Ma_NIES_1211           |              |              |              |              |              |            |             |
| Ma_NIES_2481           |              |              |              |              |              |            |             |
| Ma_NIES_2519           |              |              |              |              |              |            |             |
| Ma_NIES_2520           |              |              |              |              |              |            |             |
| Ma_NIES_2521           |              |              |              |              |              |            |             |
| Ma_NIES_2522           |              |              |              |              |              |            |             |
| Ma_NIES_2549           |              |              |              |              |              |            |             |
| Ma_NIES_298            |              |              |              |              |              |            |             |
| Ma_NIES_3787           |              |              |              |              |              |            |             |
| Ma_NIES_3804           |              |              |              |              |              |            |             |
| Ma_NIES_3806           |              |              |              |              |              |            |             |
| Ma_NIES_3807           |              |              |              |              |              |            |             |
| Ma_NIES_4264           | 1            |              |              |              |              |            |             |
| Ma_NIES_4285           | 1            | 1            |              |              |              |            |             |
| Ma_NIES_4325           | 0.9979751    | 0.9979751    | 0.9979751    |              |              |            |             |
| Ma_NIES_44             | 0.99594328   | 0.99594328   | 0.99594328   | 0.99729663   |              |            |             |
| Ma_NIES_843            | 0.99932596   | 0.99932596   | 0.99932596   | 0.99729913   | 0.9952654    |            |             |
| Ma_NIES_87             | 0.99662378   | 0.99662378   | 0.99662378   | 0.99729833   | 0.995264     | 0.99594703 |             |
| Ma_NIES_88             | 0.99797382   | 0.99797382   | 0.99797382   | 0.99594057   | 0.99390043   | 0.99729743 | 0.99458521  |
| Ma_PCC7005             | 0.99730003   | 0.99730003   | 0.99730003   | 0.9979745    | 0.99594208   | 0.99662378 | 0.99932596  |
| Ma_PCC7806SL           | 0.99729833   | 0.99729833   | 0.99729833   | 0.99932576   | 0.99661853   | 0.99662166 | 0.99662066  |
| Ma_PCC7941             | 0.99797637   | 0.99797637   | 0.99797637   | 0.99865057   | 0.99662066   | 0.99865141 | 0.99730003  |
| Ma_PCC9432             | 0.99865141   | 0.99865141   | 0.99865141   | 0.99932553   | 0.99729753   | 0.99797637 | 0.99797577  |
| Ma_PCC9443             | 0.9979751    | 0.9979751    | 0.9979751    | 0.99864972   | 0.99661853   | 0.99729913 | 0.99729833  |
| Ma_PCC9701             | 0.99594583   | 0.99594583   | 0.99594583   | 0.99662066   | 0.9945838    | 0.99662278 | 0.99662178  |
| Ma_PCC9717             | 0.99932576   | 0.99932576   | 0.99932576   | 0.99729833   | 0.995264     | 0.99865101 | 0.99730082  |
| Ma_PCC9806             | 0.99730082   | 0.99730082   | 0.99730082   | 0.9979751    | 0.99594328   | 0.99797637 | 0.99797577  |
| Ma_PCC9807             | 0.99865141   | 0.99865141   | 0.99865141   | 0.99662266   | 0.99458702   | 0.99797637 | 0.99662378  |
| Ma_PCC9808             | 0.99730082   | 0.99730082   | 0.99730082   | 0.9979751    | 0.99594328   | 0.99662478 | 0.99932576  |
| Ma_PCC9809             | 0.99797637   | 0.99797637   | 0.99797637   | 0.99865057   | 0.99662066   | 0.99865141 | 0.99730003  |
| Ma_QC_Ch_20071001_M135 | 0.99797517   | 0.99797517   | 0.99797517   | 0.99594328   | 0.99390451   | 0.99729923 | 0.99730003  |
| Ma_SC_T_19800800_S464  | 0.99594328   | 0.99594328   | 0.99594328   | 0.99661853   | 0.99458038   | 0.9952654  | 0.9979745   |
| Ma_Sj                  | 0.99865141   | 0.99865141   | 0.99865141   | 0.99932553   | 0.99729753   | 0.99797637 | 0.99797577  |
| Ma_TAIHU98             | 0.9979751    | 0.9979751    | 0.9979751    | 1            | 0.99729663   | 0.99729913 | 0.99729833  |
| Mf_FACHB_1344          | 0.99932553   | 0.99932553   | 0.99932553   | 0.99729743   | 0.99526242   | 0.99865057 | 0.99594448  |
| Mf_QC_C_20070823_S20D  | 0.99729923   | 0.99729923   | 0.99729923   | 0.9979739    | 0.99594087   | 0.99662278 | 0.99797577  |
| Mf_WU_F_19750830_S460  | 0.99932576   | 0.99932576   | 0.99932576   | 0.99729833   | 0.995264     | 0.99865101 | 0.99730082  |
| Mn_MB_F_20050700_S1D   | 0.99865141   | 0.99865141   | 0.99865141   | 0.99662266   | 0.99458702   | 0.99797637 | 0.99662378  |
| Mp_FACHB_1757          | 0.99662478   | 0.99662478   | 0.99662478   | 0.99729913   | 0.9952654    | 0.99730082 | 0.99730003  |
| Mp_MB_F_20051200_S9D   | 0.99797637   | 0.99797637   | 0.99797637   | 0.99865057   | 0.99662066   | 0.99865141 | 0.99730003  |
| Msp_0824               | 0.9979751    | 0.9979751    | 0.9979751    | 1            | 0.99729663   | 0.99729913 | 0.99729833  |
| Msp_LEGE00066          | 0.99662378   | 0.99662378   | 0.99662378   | 0.99729833   | 0.995264     | 0.99730003 | 0.99865141  |
| Msp_MC19               | 0.99797637   | 0.99797637   | 0.99797637   | 0.99729913   | 0.9952654    | 0.99865141 | 0.99730003  |
| Msp_OC_L_20101000_S702 | 0.99044242   | 0.99044242   | 0.99044242   | 0.98906184   | 0.98698842   | 0.98975588 | 0.98906554  |
| Msp_TI_4               | 0.9979751    | 0.9979751    | 0.9979751    | 1            | 0.99729663   | 0.99729913 | 0.99729833  |
| Mv_FACHB_1342          | 0.99932596   | 0.99932596   | 0.99932596   | 0.99729913   | 0.9952654    | 0.99865141 | 0.99730003  |
| Mv_NIES_102            | 0.99797637   | 0.99797637   | 0.99797637   | 0.99729913   | 0.9952654    | 0.99865141 | 0.99730003  |
| Mw_FACHB_1317          | 0.99797517   | 0.99797517   | 0.99797517   | 0.99594328   | 0.99390451   | 0.99729923 | 0.99730003  |
| Mw_FACHB_1339          | 0.99662378   | 0.99662378   | 0.99662378   | 0.99729833   | 0.995264     | 0.99594703 | 0.99865061  |
| Mw_MB_S_20031200_S109D | 0.99932596   | 0.99932596   | 0.99932596   | 0.99729913   | 0.9952654    | 1          | 0.99594703  |
|                        | 0.99797577   | 0.99797577   | 0.99797577   | 0.99594448   | 0.9952668    | 0.99865101 | 0.99594583  |

| Genome ID              | Ma_NIES_87 | Ma_NIES_88 | Ma_PCC7005 | Ma_PCC7806SL | Ma_PCC7941 | Ma_PCC9432 | Ma_PCC9443 |
|------------------------|------------|------------|------------|--------------|------------|------------|------------|
| Ma_1130S32             |            |            |            |              |            |            |            |
| Ma_BLCCF108            |            |            |            |              |            |            |            |
| Ma_BLCCF158            |            |            |            |              |            |            |            |
| Ma_FD4                 |            |            |            |              |            |            |            |
| Ma_KLA2                |            |            |            |              |            |            |            |
| Ma_KWA                 |            |            |            |              |            |            |            |
| Ma_L211_11             |            |            |            |              |            |            |            |
| Ma_LEGE11464           |            |            |            |              |            |            |            |
| Ma_LEGE91341           |            |            |            |              |            |            |            |
| Ma_LG11_05             |            |            |            |              |            |            |            |
| Ma_MB_S_20031200_S102D |            |            |            |              |            |            |            |
| Ma_NIES_1211           |            |            |            |              |            |            |            |
| Ma_NIES_2481           |            |            |            |              |            |            |            |
| Ma_NIES_2519           |            |            |            |              |            |            |            |
| Ma_NIES_2520           |            |            |            |              |            |            |            |
| Ma_NIES_2521           |            |            |            |              |            |            |            |
| Ma_NIES_2522           |            |            |            |              |            |            |            |
| Ma_NIES_2549           |            |            |            |              |            |            |            |
| Ma_NIES_298            |            |            |            |              |            |            |            |
| Ma_NIES_3787           |            |            |            |              |            |            |            |
| Ma_NIES_3804           |            |            |            |              |            |            |            |
| Ma_NIES_3806           |            |            |            |              |            |            |            |
| Ma_NIES_3807           |            |            |            |              |            |            |            |
| Ma_NIES_4264           |            |            |            |              |            |            |            |
| Ma_NIES_4285           |            |            |            |              |            |            |            |
| Ma_NIES_4325           |            |            |            |              |            |            |            |
| Ma_NIES_44             |            |            |            |              |            |            |            |
| Ma_NIES_843            |            |            |            |              |            |            |            |
| Ma_NIES_87             |            |            |            |              |            |            |            |
| Ma_NIES_88             | 0.99526382 |            |            |              |            |            |            |
| Ma_PCC7005             | 0.99526083 | 0.99729753 |            |              |            |            |            |
| Ma_PCC7806SL           | 0.99594313 | 0.99797577 | 0.9979745  |              |            |            |            |
| Ma_PCC7941             | 0.99662053 | 0.99865101 | 0.99865017 | 0.99932596   |            |            |            |
| Ma_PCC9432             | 0.99729913 | 0.9979745  | 0.99797322 | 0.99865057   | 0.99932553 |            |            |
| Ma_PCC9443             | 0.99458521 | 0.99594463 | 0.99594208 | 0.99797517   | 0.99729923 | 0.99729833 |            |
| Ma_PCC9701             | 0.99729663 | 0.99797637 | 0.99662066 | 0.99730003   | 0.99797577 | 0.99729833 | 0.99526698 |
| Ma_PCC9717             | 0.99526523 | 0.99730003 | 0.99729833 | 0.99932596   | 0.99865141 | 0.9979751  | 0.99865061 |
| Ma_PCC9806             | 0.99662053 | 0.99594703 | 0.99594448 | 0.99662478   | 0.99730082 | 0.99662266 | 0.99594583 |
| Ma_PCC9807             | 0.99526523 | 0.99865101 | 0.99729833 | 0.99797637   | 0.99865141 | 0.9979751  | 0.99729923 |
| Ma_PCC9808             | 0.99594313 | 0.99797577 | 0.9979745  | 1            | 0.99932596 | 0.99865057 | 0.99797517 |
| Ma_PCC9809             | 0.99594072 | 0.99797577 | 0.995264   | 0.99594583   | 0.99662278 | 0.99594328 | 0.99390836 |
| Ma_QC_Ch_20071001_M135 | 0.9952654  | 0.99865017 | 0.99593952 | 0.99662066   | 0.99729753 | 0.99797517 | 0.995264   |
| Ma_SC_T_19800800_S464  | 0.99662053 | 0.99865101 | 0.99865017 | 0.99932596   | 1          | 0.99932553 | 0.99729923 |
| Ma_Sj                  | 0.99594057 | 0.9979745  | 0.99932576 | 0.99865057   | 0.99932553 | 0.99864972 | 0.99662066 |
| Ma_TAIHU98             | 0.99865057 | 0.99662166 | 0.99661953 | 0.99729913   | 0.9979751  | 0.99865141 | 0.99594448 |
| Mf_FACHB_1344          | 0.99526242 | 0.99865101 | 0.99729673 | 0.99797517   | 0.99865061 | 0.9979739  | 0.99594343 |
| Mf_QC_C_20070823_S20D  | 0.99729663 | 0.99797637 | 0.99662066 | 0.99730003   | 0.99797577 | 0.99729833 | 0.99526698 |
| Mf_WU_F_19750830_S460  | 0.99662053 | 0.99594703 | 0.99594448 | 0.99662478   | 0.99730082 | 0.99662266 | 0.99594583 |
| Mn_MB_F_20050700_S1D   | 0.99458682 | 0.99662378 | 0.99662166 | 0.99865141   | 0.99797637 | 0.99729913 | 0.99797517 |
| Mp_FACHB_1757          | 0.99594313 | 0.99797577 | 0.9979745  | 1            | 0.99932596 | 0.99865057 | 0.99797517 |
| Mp_MB_F_20051200_S9D   | 0.99594057 | 0.9979745  | 0.99932576 | 0.99865057   | 0.99932553 | 0.99864972 | 0.99662066 |
| Msp_0824               | 0.99458521 | 0.99797637 | 0.99662066 | 0.99865101   | 0.99797577 | 0.99729833 | 0.99797457 |
| Msp_LEGE00066          | 0.99594313 | 0.99797577 | 0.99662166 | 0.99865141   | 0.99797637 | 0.99729913 | 0.99662278 |
| Msp_MC19               | 0.9883664  | 0.98837776 | 0.98837034 | 0.98906882   | 0.98975588 | 0.98906184 | 0.98837427 |
| Msp_OC_L_20101000_S702 | 0.99594057 | 0.9979745  | 0.99932576 | 0.99865057   | 0.99932553 | 0.99864972 | 0.99662066 |
| Msp_TI_4               | 0.99729743 | 0.99662378 | 0.99662166 | 0.99730082   | 0.99797637 | 0.99729913 | 0.99662278 |
| Mv_FACHB_1342          | 0.99594313 | 0.99797577 | 0.99662166 | 0.99865141   | 0.99797637 | 0.99729913 | 0.99662278 |
| Mv_NIES_102            | 0.99594072 | 0.99797577 | 0.995264   | 0.99594583   | 0.99662278 | 0.99594328 | 0.99390836 |
| Mw_FACHB_1317          | 0.99458521 | 0.99797517 | 0.9979751  | 0.99730003   | 0.99797577 | 0.99729833 | 0.99662178 |
| Mw_FACHB_1339          | 0.99729743 | 0.99662378 | 0.99662166 | 0.99865141   | 0.99797637 | 0.99729913 | 0.99662278 |
| Mw_MB_S_20031200_S109D | 0.99594193 | 0.99526838 | 0.9952654  | 0.99730003   | 0.99662378 | 0.99594448 | 0.99662178 |



| Genome ID              | Ma_PCC9701 | Ma_PCC9717 | Ma_PCC9806 | Ma_PCC9807 | Ma_PCC9808 | Ma_PCC9809 | Ma_QC_Ch_20071001_M135 |
|------------------------|------------|------------|------------|------------|------------|------------|------------------------|
| Ma_1130S32             |            |            |            |            |            |            |                        |
| Ma_BLCCF108            |            |            |            |            |            |            |                        |
| Ma_BLCCF158            |            |            |            |            |            |            |                        |
| Ma_FD4                 |            |            |            |            |            |            |                        |
| Ma_KLA2                |            |            |            |            |            |            |                        |
| Ma_KWA                 |            |            |            |            |            |            |                        |
| Ma_L211_11             |            |            |            |            |            |            |                        |
| Ma_LEGE11464           |            |            |            |            |            |            |                        |
| Ma_LEGE91341           |            |            |            |            |            |            |                        |
| Ma_LG11_05             |            |            |            |            |            |            |                        |
| Ma_MB_S_20031200_S102D |            |            |            |            |            |            |                        |
| Ma_NIES_1211           |            |            |            |            |            |            |                        |
| Ma_NIES_2481           |            |            |            |            |            |            |                        |
| Ma_NIES_2519           |            |            |            |            |            |            |                        |
| Ma_NIES_2520           |            |            |            |            |            |            |                        |
| Ma_NIES_2521           |            |            |            |            |            |            |                        |
| Ma_NIES_2522           |            |            |            |            |            |            |                        |
| Ma_NIES_2549           |            |            |            |            |            |            |                        |
| Ma_NIES_298            |            |            |            |            |            |            |                        |
| Ma_NIES_3787           |            |            |            |            |            |            |                        |
| Ma_NIES_3804           |            |            |            |            |            |            |                        |
| Ma_NIES_3806           |            |            |            |            |            |            |                        |
| Ma_NIES_3807           |            |            |            |            |            |            |                        |
| Ma_NIES_4264           |            |            |            |            |            |            |                        |
| Ma_NIES_4285           |            |            |            |            |            |            |                        |
| Ma_NIES_4325           |            |            |            |            |            |            |                        |
| Ma_NIES_44             |            |            |            |            |            |            |                        |
| Ma_NIES_843            |            |            |            |            |            |            |                        |
| Ma_NIES_87             |            |            |            |            |            |            |                        |
| Ma_NIES_88             |            |            |            |            |            |            |                        |
| Ma_PCC7005             |            |            |            |            |            |            |                        |
| Ma_PCC7806SL           |            |            |            |            |            |            |                        |
| Ma_PCC7941             |            |            |            |            |            |            |                        |
| Ma_PCC9432             |            |            |            |            |            |            |                        |
| Ma_PCC9443             |            |            |            |            |            |            |                        |
| Ma_PCC9701             |            |            |            |            |            |            |                        |
| Ma_PCC9717             | 0.99662378 |            |            |            |            |            |                        |
| Ma_PCC9806             | 0.99797577 | 0.99730082 |            |            |            |            |                        |
| Ma_PCC9807             | 0.99662378 | 0.99865141 | 0.99730082 |            |            |            |                        |
| Ma_PCC9808             | 0.99730003 | 0.99932596 | 0.99662478 | 0.99797637 |            |            |                        |
| Ma_PCC9809             | 0.99865101 | 0.99526838 | 0.99662278 | 0.99662278 | 0.99594583 |            |                        |
| Ma_QC_Ch_20071001_M135 | 0.99662166 | 0.99594328 | 0.99458702 | 0.99729753 | 0.99662066 | 0.9979751  |                        |
| Ma_SC_T_19800800_S464  | 0.99797577 | 0.99865141 | 0.99730082 | 0.99865141 | 0.99932596 | 0.99662278 | 0.99729753             |
| Ma_Sj                  | 0.99729833 | 0.9979751  | 0.99662266 | 0.9979751  | 0.99865057 | 0.99594328 | 0.99661853             |
| Ma_TAIHU98             | 0.99865017 | 0.99662266 | 0.9979751  | 0.99662266 | 0.99729913 | 0.99729753 | 0.99662278             |
| Mf_FACHB_1344          | 0.99797577 | 0.99729923 | 0.99594583 | 0.99729923 | 0.99797517 | 0.99797637 | 0.99865057             |
| Mf_QC_C_20070823_S20D  | 1          | 0.99662378 | 0.99797577 | 0.99662378 | 0.99730003 | 0.99865101 | 0.99662166             |
| Mf_WU_F_19750830_S460  | 0.99797577 | 0.99730082 | 1          | 0.99730082 | 0.99662478 | 0.99662278 | 0.99458702             |
| Mn_MB_F_20050700_S1D   | 0.99594703 | 0.99932596 | 0.99662478 | 0.99797637 | 0.99865141 | 0.99459043 | 0.9952654              |
| Mp_FACHB_1757          | 0.99730003 | 0.99932596 | 0.99662478 | 0.99797637 | 1          | 0.99594583 | 0.99662066             |
| Mp_MB_F_20051200_S9D   | 0.99729833 | 0.9979751  | 0.99662266 | 0.9979751  | 0.99865057 | 0.99594328 | 0.99661853             |
| Msp_0824               | 0.99730082 | 0.99932576 | 0.99662378 | 0.99797577 | 0.99865101 | 0.99594703 | 0.99662166             |
| Msp_LEGE00066          | 0.99730003 | 0.99797637 | 0.99662478 | 0.99797637 | 0.99865141 | 0.99729923 | 0.99662066             |
| Msp_MC19               | 0.98975281 | 0.98975588 | 0.99044242 | 0.98975588 | 0.98906882 | 0.98837427 | 0.98698842             |
| Msp_OC_L_20101000_S702 | 0.99729833 | 0.9979751  | 0.99662266 | 0.9979751  | 0.99865057 | 0.99594328 | 0.99661853             |
| Msp_TI_4               | 0.99865101 | 0.99797637 | 0.99932596 | 0.99797637 | 0.99730082 | 0.99729923 | 0.9952654              |
| Mv_FACHB_1342          | 0.99730003 | 0.99797637 | 0.99662478 | 0.99797637 | 0.99865141 | 0.99729923 | 0.99662066             |
| Mv_NIES_102            | 0.99865101 | 0.99526838 | 0.99662278 | 0.99662278 | 0.99594583 | 1          | 0.9979751              |
| Mw_FACHB_1317          | 0.99594583 | 0.99797577 | 0.99662378 | 0.99932576 | 0.99730003 | 0.99594463 | 0.99661965             |
| Mw_FACHB_1339          | 0.99865101 | 0.99797637 | 0.99797637 | 0.99662478 | 0.99865141 | 0.99729923 | 0.9952654              |
| Mw_MB_S_20031200_S109D | 0.99729923 | 0.99797577 | 0.99797577 | 0.99662378 | 0.99730003 | 0.99594463 | 0.99390632             |

| Genome ID              | Ma_SC_T_19800800_S464 | Ma_Sj      | Ma_TAIHU98 | Mf_FACHB_1344 | Mf_QC_C_20070823_S20D | Mf_WU_F_19750830_S460 | Mn_MB_F_20050700_S1D |
|------------------------|-----------------------|------------|------------|---------------|-----------------------|-----------------------|----------------------|
| Ma_1130S32             |                       |            |            |               |                       |                       |                      |
| Ma_BLCCF108            |                       |            |            |               |                       |                       |                      |
| Ma_BLCCF158            |                       |            |            |               |                       |                       |                      |
| Ma_FD4                 |                       |            |            |               |                       |                       |                      |
| Ma_KLA2                |                       |            |            |               |                       |                       |                      |
| Ma_KWA                 |                       |            |            |               |                       |                       |                      |
| Ma_L211_11             |                       |            |            |               |                       |                       |                      |
| Ma_LEGE11464           |                       |            |            |               |                       |                       |                      |
| Ma_LEGE91341           |                       |            |            |               |                       |                       |                      |
| Ma_LG11_05             |                       |            |            |               |                       |                       |                      |
| Ma_MB_S_20031200_S102D |                       |            |            |               |                       |                       |                      |
| Ma_NIES_1211           |                       |            |            |               |                       |                       |                      |
| Ma_NIES_2481           |                       |            |            |               |                       |                       |                      |
| Ma_NIES_2519           |                       |            |            |               |                       |                       |                      |
| Ma_NIES_2520           |                       |            |            |               |                       |                       |                      |
| Ma_NIES_2521           |                       |            |            |               |                       |                       |                      |
| Ma_NIES_2522           |                       |            |            |               |                       |                       |                      |
| Ma_NIES_2549           |                       |            |            |               |                       |                       |                      |
| Ma_NIES_298            |                       |            |            |               |                       |                       |                      |
| Ma_NIES_3787           |                       |            |            |               |                       |                       |                      |
| Ma_NIES_3804           |                       |            |            |               |                       |                       |                      |
| Ma_NIES_3806           |                       |            |            |               |                       |                       |                      |
| Ma_NIES_3807           |                       |            |            |               |                       |                       |                      |
| Ma_NIES_4264           |                       |            |            |               |                       |                       |                      |
| Ma_NIES_4285           |                       |            |            |               |                       |                       |                      |
| Ma_NIES_4325           |                       |            |            |               |                       |                       |                      |
| Ma_NIES_44             |                       |            |            |               |                       |                       |                      |
| Ma_NIES_843            |                       |            |            |               |                       |                       |                      |
| Ma_NIES_87             |                       |            |            |               |                       |                       |                      |
| Ma_NIES_88             |                       |            |            |               |                       |                       |                      |
| Ma_PCC7005             |                       |            |            |               |                       |                       |                      |
| Ma_PCC7806SL           |                       |            |            |               |                       |                       |                      |
| Ma_PCC7941             |                       |            |            |               |                       |                       |                      |
| Ma_PCC9432             |                       |            |            |               |                       |                       |                      |
| Ma_PCC9443             |                       |            |            |               |                       |                       |                      |
| Ma_PCC9701             |                       |            |            |               |                       |                       |                      |
| Ma_PCC9717             |                       |            |            |               |                       |                       |                      |
| Ma_PCC9806             |                       |            |            |               |                       |                       |                      |
| Ma_PCC9807             |                       |            |            |               |                       |                       |                      |
| Ma_PCC9808             |                       |            |            |               |                       |                       |                      |
| Ma_PCC9809             |                       |            |            |               |                       |                       |                      |
| Ma_QC_Ch_20071001_M135 |                       |            |            |               |                       |                       |                      |
| Ma_SC_T_19800800_S464  |                       |            |            |               |                       |                       |                      |
| Ma_Sj                  | 0.99932553            |            |            |               |                       |                       |                      |
| Ma_TAIHU98             | 0.9979751             | 0.99729743 |            |               |                       |                       |                      |
| Mf_FACHB_1344          | 0.99865061            | 0.9979739  | 0.99662066 |               |                       |                       |                      |
| Mf_QC_C_20070823_S20D  | 0.99797577            | 0.99729833 | 0.99865017 | 0.99797577    |                       |                       |                      |
| Mf_WU_F_19750830_S460  | 0.99730082            | 0.99662266 | 0.9979751  | 0.99594583    | 0.99797577            |                       |                      |
| Mn_MB_F_20050700_S1D   | 0.99797637            | 0.99729913 | 0.99594568 | 0.99662278    | 0.99594703            | 0.99662478            |                      |
| Mp_FACHB_1757          | 0.99932596            | 0.99865057 | 0.99729913 | 0.99797517    | 0.99730003            | 0.99662478            | 0.99865141           |
| Mp_MB_F_20051200_S9D   | 0.99932553            | 1          | 0.99729743 | 0.9979739     | 0.99729833            | 0.99662266            | 0.99729913           |
| Msp_0824               | 0.99797577            | 0.99729833 | 0.99594448 | 0.99797577    | 0.99730082            | 0.99662378            | 0.99865101           |
| Msp_LEGE00066          | 0.99797637            | 0.99729913 | 0.99729913 | 0.99662278    | 0.99730003            | 0.99662478            | 0.99730082           |
| Msp_MC19               | 0.98975588            | 0.98906184 | 0.98974934 | 0.98837427    | 0.98975281            | 0.99044242            | 0.98906882           |
| Msp_OC_L_20101000_S702 | 0.99932553            | 1          | 0.99729743 | 0.9979739     | 0.99729833            | 0.99662266            | 0.99729913           |
| Msp_TI_4               | 0.99797637            | 0.99729913 | 0.99865057 | 0.99662278    | 0.99865101            | 0.99932596            | 0.99730082           |
| Mv_FACHB_1342          | 0.99797637            | 0.99729913 | 0.99729913 | 0.99662278    | 0.99730003            | 0.99662478            | 0.99730082           |
| Mv_NIES_102            | 0.99662278            | 0.99594328 | 0.99729753 | 0.99797637    | 0.99865101            | 0.99662278            | 0.99459043           |
| Mw_FACHB_1317          | 0.99797577            | 0.99729833 | 0.99594448 | 0.99662178    | 0.99594583            | 0.99662378            | 0.99730003           |
| Mw_FACHB_1339          | 0.99797637            | 0.99729913 | 0.99865057 | 0.99662278    | 0.99865101            | 0.99797637            | 0.99730082           |
| Mw_MB_S_20031200_S109D | 0.99662378            | 0.99594448 | 0.99729833 | 0.99526698    | 0.99729923            | 0.99797577            | 0.99730003           |

| Genome ID              | Mp_FACHB_1757 | Mp_MB_F_20051200_S9D | Msp_0824   | Msp_LEGE00066 | Msp_MC19   | Msp_OC_L_20101000_S702 | Msp_TI_4   |
|------------------------|---------------|----------------------|------------|---------------|------------|------------------------|------------|
| Ma_1130S32             |               |                      |            |               |            |                        |            |
| Ma_BLCCF108            |               |                      |            |               |            |                        |            |
| Ma_BLCCF158            |               |                      |            |               |            |                        |            |
| Ma_FD4                 |               |                      |            |               |            |                        |            |
| Ma_KLA2                |               |                      |            |               |            |                        |            |
| Ma_KWA                 |               |                      |            |               |            |                        |            |
| Ma_L211_11             |               |                      |            |               |            |                        |            |
| Ma_LEGE11464           |               |                      |            |               |            |                        |            |
| Ma_LEGE91341           |               |                      |            |               |            |                        |            |
| Ma_LG11_05             |               |                      |            |               |            |                        |            |
| Ma_MB_S_20031200_S102D |               |                      |            |               |            |                        |            |
| Ma_NIES_1211           |               |                      |            |               |            |                        |            |
| Ma_NIES_2481           |               |                      |            |               |            |                        |            |
| Ma_NIES_2519           |               |                      |            |               |            |                        |            |
| Ma_NIES_2520           |               |                      |            |               |            |                        |            |
| Ma_NIES_2521           |               |                      |            |               |            |                        |            |
| Ma_NIES_2522           |               |                      |            |               |            |                        |            |
| Ma_NIES_2549           |               |                      |            |               |            |                        |            |
| Ma_NIES_298            |               |                      |            |               |            |                        |            |
| Ma_NIES_3787           |               |                      |            |               |            |                        |            |
| Ma_NIES_3804           |               |                      |            |               |            |                        |            |
| Ma_NIES_3806           |               |                      |            |               |            |                        |            |
| Ma_NIES_3807           |               |                      |            |               |            |                        |            |
| Ma_NIES_4264           |               |                      |            |               |            |                        |            |
| Ma_NIES_4285           |               |                      |            |               |            |                        |            |
| Ma_NIES_4325           |               |                      |            |               |            |                        |            |
| Ma_NIES_44             |               |                      |            |               |            |                        |            |
| Ma_NIES_843            |               |                      |            |               |            |                        |            |
| Ma_NIES_87             |               |                      |            |               |            |                        |            |
| Ma_NIES_88             |               |                      |            |               |            |                        |            |
| Ma_PCC7005             |               |                      |            |               |            |                        |            |
| Ma_PCC7806SL           |               |                      |            |               |            |                        |            |
| Ma_PCC7941             |               |                      |            |               |            |                        |            |
| Ma_PCC9432             |               |                      |            |               |            |                        |            |
| Ma_PCC9443             |               |                      |            |               |            |                        |            |
| Ma_PCC9701             |               |                      |            |               |            |                        |            |
| Ma_PCC9717             |               |                      |            |               |            |                        |            |
| Ma_PCC9806             |               |                      |            |               |            |                        |            |
| Ma_PCC9807             |               |                      |            |               |            |                        |            |
| Ma_PCC9808             |               |                      |            |               |            |                        |            |
| Ma_PCC9809             |               |                      |            |               |            |                        |            |
| Ma_QC_Ch_20071001_M135 |               |                      |            |               |            |                        |            |
| Ma_SC_T_19800800_S464  |               |                      |            |               |            |                        |            |
| Ma_Sj                  |               |                      |            |               |            |                        |            |
| Ma_TAIHU98             |               |                      |            |               |            |                        |            |
| Mf_FACHB_1344          |               |                      |            |               |            |                        |            |
| Mf_QC_C_20070823_S20D  |               |                      |            |               |            |                        |            |
| Mf_WU_F_19750830_S460  |               |                      |            |               |            |                        |            |
| Mn_MB_F_20050700_S1D   |               |                      |            |               |            |                        |            |
| Mp_FACHB_1757          |               |                      |            |               |            |                        |            |
| Mp_MB_F_20051200_S9D   | 0.99865057    |                      |            |               |            |                        |            |
| Msp_0824               | 0.99865101    | 0.99729833           |            |               |            |                        |            |
| Msp_LEGE00066          | 0.99865141    | 0.99729913           | 0.99730003 |               |            |                        |            |
| Msp_MC19               | 0.98906882    | 0.98906184           | 0.98906554 | 0.98906882    |            |                        |            |
| Msp_OC_L_20101000_S702 | 0.99865057    | 1                    | 0.99729833 | 0.99729913    | 0.98906184 |                        |            |
| Msp_TI_4               | 0.99730082    | 0.99729913           | 0.99730003 | 0.99730082    |            | 0.99729913             |            |
| Mv_FACHB_1342          | 0.99865141    | 0.99729913           | 0.99730003 | 1             | 0.98906882 | 0.99729913             | 0.99730082 |
| Mv_NIES_102            | 0.99594583    | 0.99594328           | 0.99594703 | 0.99729923    | 0.98837427 | 0.99594328             | 0.99729923 |
| Mw_FACHB_1317          | 0.99730003    | 0.99729833           | 0.99729923 | 0.99730003    | 0.98906554 | 0.99729833             | 0.99730003 |
| Mw_FACHB_1339          | 0.99865141    | 0.99729913           | 0.99730003 | 0.99865141    | 0.98975588 | 0.99729913             | 0.99865141 |
| Mw_MB_S_20031200_S109D | 0.99730003    | 0.99594448           | 0.99729923 | 0.99730003    | 0.98975281 | 0.99594448             | 0.99865101 |

| Genome ID              | Mv_FACHB_1342 | Mv_NIES_102 | Mw_FACHB_1317 | Mw_FACHB_1339 |
|------------------------|---------------|-------------|---------------|---------------|
| Ma_1130S32             |               |             |               |               |
| Ma_BLCCF108            |               |             |               |               |
| Ma_BLCCF158            |               |             |               |               |
| Ma_FD4                 |               |             |               |               |
| Ma_KLA2                |               |             |               |               |
| Ma_KWA                 |               |             |               |               |
| Ma_L211_11             |               |             |               |               |
| Ma_LEGE11464           |               |             |               |               |
| Ma_LEGE91341           |               |             |               |               |
| Ma_LG11_05             |               |             |               |               |
| Ma_MB_S_20031200_S102D |               |             |               |               |
| Ma_NIES_1211           |               |             |               |               |
| Ma_NIES_2481           |               |             |               |               |
| Ma_NIES_2519           |               |             |               |               |
| Ma_NIES_2520           |               |             |               |               |
| Ma_NIES_2521           |               |             |               |               |
| Ma_NIES_2522           |               |             |               |               |
| Ma_NIES_2549           |               |             |               |               |
| Ma_NIES_298            |               |             |               |               |
| Ma_NIES_3787           |               |             |               |               |
| Ma_NIES_3804           |               |             |               |               |
| Ma_NIES_3806           |               |             |               |               |
| Ma_NIES_3807           |               |             |               |               |
| Ma_NIES_4264           |               |             |               |               |
| Ma_NIES_4285           |               |             |               |               |
| Ma_NIES_4325           |               |             |               |               |
| Ma_NIES_44             |               |             |               |               |
| Ma_NIES_843            |               |             |               |               |
| Ma_NIES_87             |               |             |               |               |
| Ma_NIES_88             |               |             |               |               |
| Ma_PCC7005             |               |             |               |               |
| Ma_PCC7806SL           |               |             |               |               |
| Ma_PCC7941             |               |             |               |               |
| Ma_PCC9432             |               |             |               |               |
| Ma_PCC9443             |               |             |               |               |
| Ma_PCC9701             |               |             |               |               |
| Ma_PCC9717             |               |             |               |               |
| Ma_PCC9806             |               |             |               |               |
| Ma_PCC9807             |               |             |               |               |
| Ma_PCC9808             |               |             |               |               |
| Ma_PCC9809             |               |             |               |               |
| Ma_QC_Ch_20071001_M135 |               |             |               |               |
| Ma_SC_T_19800800_S464  |               |             |               |               |
| Ma_Sj                  |               |             |               |               |
| Ma_TAIHU98             |               |             |               |               |
| Mf_FACHB_1344          |               |             |               |               |
| Mf_QC_C_20070823_S20D  |               |             |               |               |
| Mf_WU_F_19750830_S460  |               |             |               |               |
| Mn_MB_F_20050700_S1D   |               |             |               |               |
| Mp_FACHB_1757          |               |             |               |               |
| Mp_MB_F_20051200_S9D   |               |             |               |               |
| Msp_0824               |               |             |               |               |
| Msp_LEGE00066          |               |             |               |               |
| Msp_MC19               |               |             |               |               |
| Msp_OC_L_20101000_S702 |               |             |               |               |
| Msp_T1_4               |               |             |               |               |
| Mv_FACHB_1342          |               |             |               |               |
| Mv_NIES_102            | 0.99729923    |             |               |               |
| Mw_FACHB_1317          | 0.99730003    | 0.99594463  |               |               |
| Mw_FACHB_1339          | 0.99865141    | 0.99729923  | 0.99594703    |               |
| Mw_MB_S_20031200_S109D | 0.99730003    | 0.99594463  | 0.99594583    | 0.99865101    |

**Table S5.**

**Proposed marker genes and primer sets for Sanger and Illumina sequencing.** Proposed marker genes that can generate similar phylogenies to the core gene phylogeny shown in Fig. 2. See Fig S6 for the distribution of variable and conserved sites for marker genes.

| Gene        | Length (bp) | product                                       | Ratio of variable to conserved sites <sup>§</sup> | Sanger sequencing                          |                                             | Illumina sequencing                         |                                             |
|-------------|-------------|-----------------------------------------------|---------------------------------------------------|--------------------------------------------|---------------------------------------------|---------------------------------------------|---------------------------------------------|
|             |             |                                               |                                                   | Forward (5' → 3')                          | Reverse (5' → 3')                           | Forward (5' → 3')                           | Reverse (5' → 3')                           |
| <i>acrB</i> | 3065        | Multidrug efflux pump subunit AcrB            | 0.216                                             | acrB_133:<br>CCTTCITTTAGTATCGATC<br>AGAGAG | acrB_1305:<br>TGGAGATTATCGGAGG<br>CAATATA   | acrB_605:<br>GGTAGTTTACAGRTAA<br>ATACGGT    | acrB_975:<br>CCTAAAATTTGATCGT<br>GAGTGGGA   |
| <i>amtB</i> | 1436        | Ammonia transporter                           | 0.223                                             | amtB_4:<br>AACGAATTGCTCGAAAAT<br>CYGGGG    | amtB_1280:<br>TCTTCGGGAGTAACAC<br>GAATACCG  | amtB_290:<br>ATCGTTTTCGCCCTCTC<br>CACCAT    | amtB_610:<br>ACCRGCGAAGTCYTTA<br>AAACCAAG   |
| <i>cpoB</i> | 2168        | Cell division coordinator CpoB                | 0.185                                             | cpoB_60:<br>GCSCITTTTACTCTCACCA<br>GTCTC   | cpoB_1520:<br>ACCGAGGTTAAATTGT<br>TCGTCAACR | cpoB_785:<br>CYGAACAAGCCTATCG<br>TTACGC     | cpoB_1090:<br>AGCGATAATCGGCSGC<br>TTCGT     |
| <i>dppA</i> | 1616        | ABC transporter substrate-binding protein     | 0.250                                             | dppA_225:<br>GAAGGAACCACTAATTTA<br>AAGCCC  | dppA_1485:<br>GGAACITTCATCRGCGA<br>GAATITTC | dppA_225:<br>GAAGGAACCACTAAT<br>TAAAGCCC    | dppA_490:<br>GGRTAAGCTAAAAGAG<br>CRGGAAA    |
| <i>glnA</i> | 1421        | type I glutamate-- ammonia ligase             | 0.161                                             | glnA_1:<br>ATGCCCCGAAACGCCACAA<br>GAAGTC   | glnA_1352:<br>CATCGGGTTAACTTCGT<br>TATCGAG  | glnA_812:<br>ATGCACGTTACCCAGT<br>CTATCTGG   | glnA_1352:<br>CATCGGGTTAACTTCG<br>TTATCGAG  |
| <i>helY</i> | 2927        | putative helicase HelY                        | 0.178                                             | helY_220:<br>GCTCTTTCTAACCAAAAAT<br>TCCGGG | helY_1820:<br>GGCAATITTAGATGTA<br>TTTCCTGTC | helY_580:<br>CCGACTGGATTAAGT<br>GGTGCG      | helY_835:<br>GGAGCATATCCTTGTC<br>CCGCGA     |
| <i>murC</i> | 1427        | UDP-N-acetylmuramate--L-alanine ligase        | 0.174                                             | murC_40:<br>GGTATTGGCGGYATTGGG<br>ATGTC    | murC_1065:<br>CGTTGGTAYTGTTGCC<br>TTCTACC   | murC_40:<br>GGTATTGGCGGYATTG<br>GGATGTC     | murC_400:<br>TAACCGATKARGCTGC<br>TAGTGGTG   |
| <i>recJ</i> | 1964        | single-stranded-DNA-specific exonuclease RecJ | 0.179                                             | recJ_15:<br>TCCCATCCARCGCTGGTAT<br>ATTGC   | recJ_1455:<br>ATTCCCCAGGGTTGYA<br>AACTATCA  | recJ_15:<br>TCCCATCCARCGCTGGT<br>ATATTGC    | recJ_360:<br>ATTCCGTATCCCTCTTT<br>CATGCGA   |
| <i>sbcC</i> | 3023        | exonuclease subunit SbcC                      | 0.207                                             | sbcC_425:<br>CAAGCGGACGARTTTATG<br>AAACAG  | sbcC_1900:<br>AACGCCATCTTTTTTCT<br>TCTCCTC  | sbcC_425:<br>CAAGCGGACGARTTTA<br>TGAAACAG   | sbcC_771:<br>GTCTAATCTCTCRATTT<br>CYGCTAAT  |
| <i>trpE</i> | 1505        | anthranilate synthase component I             | 0.148                                             | trpE_90:<br>ATTGCCGAGATCGCTAATC<br>GGATGC  | trpE_1290:<br>CGCTGGCAAATCGAG<br>GCTATCAAAG | trpE_490:<br>AAAGATTGCGAAACGG<br>GAACCCCTAA | trpE_850:<br>CCATAGTAACCCATGT<br>GATCACCAAA |
| <i>yccS</i> | 2237        | FUSC-like inner membrane protein yccS         | 0.238                                             | ycc_415:<br>GTCGCTTACAACGGGCCG<br>GAAT     | ycc_1660:<br>TAGTCTTAATGCTTTA<br>ATGGCAGC   | ycc_1260:<br>CCCATAGTTTTTGATT<br>GGTTTAACC  | ycc_1660:<br>TAGTCTTAATGCTTTA<br>ATGGCAGC   |

§Based on alignment of 122 sequences of a marker gene using MUSCLE alignment tool with MEGA software (44).

**Table S6.**

**Cluster fidelity of the concatenated marker gene phylogeny.** Correlation matrix between phylogenies based on concatenated marker genes and the original core gene phylogeny (Fig. 2).

| Marker gene | <i>acrB</i> | <i>amtB</i> | <i>cpoB</i> | <i>dppA</i> | <i>glnA</i> | <i>hlyY</i> | <i>murC</i> | <i>recJ</i> | <i>sbcC</i> | <i>trpE</i> |
|-------------|-------------|-------------|-------------|-------------|-------------|-------------|-------------|-------------|-------------|-------------|
| <i>acrB</i> |             |             |             |             |             |             |             |             |             |             |
| <i>amtB</i> | 0.947       |             |             |             |             |             |             |             |             |             |
| <i>cpoB</i> | 0.938       | 0.965       |             |             |             |             |             |             |             |             |
| <i>dppA</i> | 0.982       | 0.965       | 0.956       |             |             |             |             |             |             |             |
| <i>glnA</i> | 1.000       | 0.991       | 0.965       | 0.982       |             |             |             |             |             |             |
| <i>hlyY</i> | 0.973       | 0.956       | 0.965       | 0.973       | 1.000       |             |             |             |             |             |
| <i>murC</i> | 0.956       | 0.965       | 0.982       | 0.982       | 0.973       | 0.956       |             |             |             |             |
| <i>recJ</i> | 0.938       | 0.947       | 0.903       | 0.920       | 0.929       | 0.938       | 0.920       |             |             |             |
| <i>sbcC</i> | 0.965       | 1.000       | 0.965       | 0.982       | 0.956       | 1.000       | 0.982       | 0.956       |             |             |
| <i>trpE</i> | 0.973       | 0.965       | 0.938       | 0.956       | 0.982       | 0.973       | 0.920       | 0.903       | 0.965       |             |
| <i>yccS</i> | 0.956       | 0.982       | 0.973       | 0.982       | 0.982       | 0.973       | 0.982       | 0.947       | 0.982       | 0.956       |
